# Supplementary material for: Integrating single-cell RNA-seq to identify fibroblast-based molecular subtypes for predicting prognosis and therapeutic response in bladder cancer
Source: publisher site journal article supplement (doi:10.18632/aging.206021), 2024-07-18
Supplement: Supplementary file [file aging-v16i14-206021-supplementary-material-SD2.pdf]

## SUPPLEMENTARY TABLES

**Supplementary Table 1. Primer sequences in RT-qPCR.**

|        | <b>Forward primer</b> | <b>Reverse primer</b>   |
|--------|-----------------------|-------------------------|
| EMP1   | GTGCTGGCTGTGCATTCTTG  | CCGTGGTGATACTGCGTTCC    |
| CERCAM | GAGCCCAGGTTCTACCCAGAT | GCAGAGTCTGATTGTTGGTCA   |
| TM4SF1 | TGCATCGGACATTCTCTGGTG | GTTCCAGCCCAATGAAGACAA   |
| FN1    | CGGTGGCTGTCAGTCAAAG   | AAACCTCGGCTTCCTCCATAA   |
| HEYL   | GGAAGAAACGCAGAGGGATCA | CAAGCGTCGCAATTCAGAAAG   |
| FBN1   | TTTAGCGTCCTACACGAGCC  | CCATCCAGGGCAACAGTAAGC   |
| ANXA1  | GCGGTGAGCCCCTATCCTA   | TGATGGTTGCTTCATCCACAC   |
| LOX    | CGGCGGAGGAAAACGTCT    | TCGGCTGGGTAAGAAATCTGA   |
| SLC2A3 | GCTGGGCATCGTTGTTGGA   | GCACTTTGTAGGATAGCAGGAAG |
| GAPDH  | CCCACTCCTCCACCTTGAC   | CCACCACCCTGTTGCTGTAG    |
