# Supplementary material for: Integrating single-cell RNA-seq to identify fibroblast-based molecular subtypes for predicting prognosis and therapeutic response in bladder cancer
Source: Aging (Albany NY). 2024 Jul 18;16(14):11385–408. doi: 10.18632/aging.206021 (PMC11315389; doi:10.18632/aging.206021)
Supplement: Supplementary Table 2 [file aging-16-206021-s003.xlsx]

## Sheet: Supplementary Table 2
Supplementary Table 2. A detailed list of differential genes.
	p_val	avg_log2FC	pct.1	pct.2	p_val_adj	cluster	gene
HCLS1	0	-0.663858	0.04	0.274	0	Malignant	HCLS1
PMP22	0	-0.737322	0.017	0.254	0	Malignant	PMP22
GYPC	0	-0.798388	0.008	0.289	0	Malignant	GYPC
TIMP2	0	-0.804873	0.029	0.275	0	Malignant	TIMP2
AXL	0	-0.834154	0.045	0.289	0	Malignant	AXL
GLIPR1	0	-0.841156	0.053	0.324	0	Malignant	GLIPR1
FYB	0	-0.854049	0.009	0.277	0	Malignant	FYB
MSN	0	-0.874564	0.049	0.353	0	Malignant	MSN
MEF2C	0	-0.891704	0.024	0.301	0	Malignant	MEF2C
SAMSN1	0	-0.902978	0.007	0.257	0	Malignant	SAMSN1
PTPRC	0	-0.90398	0.008	0.303	0	Malignant	PTPRC
IGSF6	0	-0.915402	0.006	0.25	0	Malignant	IGSF6
CD53	0	-0.964284	0.006	0.3	0	Malignant	CD53
ENG	0	-0.972506	0.033	0.257	0	Malignant	ENG
LY86	0	-0.979662	0.004	0.265	0	Malignant	LY86
TMEM176A	0	-1.02029	0.021	0.253	0	Malignant	TMEM176A
C1orf162	0	-1.04379	0.007	0.273	0	Malignant	C1orf162
CD37	0	-1.07826	0.012	0.34	0	Malignant	CD37
HCST	0	-1.09937	0.036	0.335	0	Malignant	HCST
SPI1	0	-1.12307	0.006	0.285	0	Malignant	SPI1
TGFBI	0	-1.23172	0.055	0.38	0	Malignant	TGFBI
ITGB2	0	-1.23945	0.006	0.325	0	Malignant	ITGB2
RNASE6	0	-1.25618	0.009	0.283	0	Malignant	RNASE6
A2M	0	-1.28228	0.006	0.303	0	Malignant	A2M
FCGR2A	0	-1.34889	0.01	0.295	0	Malignant	FCGR2A
SERPINF1	0	-1.36617	0.034	0.304	0	Malignant	SERPINF1
TUBA1A	0	-1.36676	0.071	0.384	0	Malignant	TUBA1A
MS4A7	0	-1.40878	0.016	0.315	0	Malignant	MS4A7
RGS10	0	-1.47203	0.127	0.497	0	Malignant	RGS10
CORO1A	0	-1.4968	0.034	0.432	0	Malignant	CORO1A
TREM2	0	-1.52855	0.005	0.265	0	Malignant	TREM2
TMEM176B	0	-1.55531	0.024	0.33	0	Malignant	TMEM176B
EMP3	0	-1.62906	0.036	0.491	0	Malignant	EMP3
CXCR4	0	-1.70291	0.027	0.39	0	Malignant	CXCR4
LST1	0	-1.80492	0.015	0.38	0	Malignant	LST1
CD14	0	-1.90852	0.011	0.312	0	Malignant	CD14
RGS2	0	-1.96729	0.051	0.386	0	Malignant	RGS2
MS4A6A	0	-2.0505	0.012	0.377	0	Malignant	MS4A6A
LYZ	0	-2.231	0.057	0.349	0	Malignant	LYZ
LAPTM5	0	-2.29163	0.067	0.54	0	Malignant	LAPTM5
GPR183	0	-2.3554	0.014	0.341	0	Malignant	GPR183
HLA-DQA1	0	-2.51872	0.067	0.449	0	Malignant	HLA-DQA1
AIF1	0	-2.62659	0.031	0.454	0	Malignant	AIF1
ALOX5AP	0	-2.63187	0.023	0.49	0	Malignant	ALOX5AP
FCER1G	0	-2.81862	0.034	0.473	0	Malignant	FCER1G
SRGN	0	-3.05364	0.178	0.631	0	Malignant	SRGN
SPARC	0	-3.1445	0.021	0.254	0	Malignant	SPARC
C1QC	0	-3.29127	0.022	0.385	0	Malignant	C1QC
RGS1	0	-3.32423	0.042	0.528	0	Malignant	RGS1
CCL4	0	-3.39186	0.048	0.358	0	Malignant	CCL4
TYROBP	0	-3.54246	0.052	0.523	0	Malignant	TYROBP
C1QA	0	-3.5863	0.034	0.409	0	Malignant	C1QA
CCL4L2	0	-3.59248	0.049	0.335	0	Malignant	CCL4L2
VIM	0	-3.60453	0.033	0.706	0	Malignant	VIM
CCL3L3	0	-3.62933	0.033	0.312	0	Malignant	CCL3L3
C1QB	0	-3.78931	0.036	0.418	0	Malignant	C1QB
CCL3	0	-3.84146	0.046	0.339	0	Malignant	CCL3
CD52	4.67459e-278	-1.32991	0.049	0.284	9.88489e-274	Malignant	CD52
HTRA1	6.29481e-266	-1.13491	0.056	0.296	1.3311e-261	Malignant	HTRA1
LGALS1	2.25795e-263	-2.63116	0.516	0.841	4.77467e-259	Malignant	LGALS1
S100P	5.56367e-259	1.06645	0.999	0.926	1.17649e-254	Malignant	S100P
IFITM2	1.15091e-254	-1.71967	0.159	0.493	2.43371e-250	Malignant	IFITM2
FAM26F	1.58804e-252	-0.99755	0.042	0.25	3.35807e-248	Malignant	FAM26F
ANXA5	1.66277e-246	-1.27626	0.219	0.561	3.5161e-242	Malignant	ANXA5
ACTB	8.74155e-246	-1.22313	0.999	1	1.84849e-241	Malignant	ACTB
HLA-DMB	3.81762e-244	-1.35535	0.088	0.357	8.07275e-240	Malignant	HLA-DMB
HLA-DQB1	6.92182e-242	-2.577	0.181	0.505	1.46369e-237	Malignant	HLA-DQB1
MGST1	5.31151e-235	1.06692	0.968	0.642	1.12317e-230	Malignant	MGST1
HLA-DPB1	1.40508e-229	-3.60695	0.29	0.612	2.97117e-225	Malignant	HLA-DPB1
KRT19	2.43519e-229	1.1007	1	0.935	5.14946e-225	Malignant	KRT19
LSP1	5.74578e-229	-1.06061	0.09	0.36	1.215e-224	Malignant	LSP1
AP1S2	7.78122e-214	-0.826177	0.082	0.33	1.64542e-209	Malignant	AP1S2
B2M	6.15842e-213	-0.970364	1	1	1.30226e-208	Malignant	B2M
LY96	9.74187e-209	-0.824516	0.081	0.33	2.06002e-204	Malignant	LY96
RNF130	4.85386e-207	-0.853762	0.084	0.33	1.0264e-202	Malignant	RNF130
FXYD3	8.65465e-200	0.985488	0.998	0.874	1.83011e-195	Malignant	FXYD3
PFN1	1.67549e-186	-0.870319	0.98	0.988	3.54298e-182	Malignant	PFN1
GSN	1.80906e-186	-1.41227	0.307	0.599	3.82543e-182	Malignant	GSN
CD83	1.60314e-185	-1.50155	0.074	0.296	3.39001e-181	Malignant	CD83
HLA-DPA1	7.20959e-185	-3.52791	0.326	0.617	1.52454e-180	Malignant	HLA-DPA1
KRT8	1.53926e-184	0.992943	0.948	0.7	3.25491e-180	Malignant	KRT8
SPP1	7.88122e-183	-4.12382	0.073	0.289	1.66656e-178	Malignant	SPP1
HSPA1A	3.09267e-182	-1.77501	0.495	0.788	6.53976e-178	Malignant	HSPA1A
EVL	1.66424e-181	-0.584331	0.057	0.257	3.5192e-177	Malignant	EVL
YWHAH	5.87993e-180	-1.57755	0.333	0.622	1.24337e-175	Malignant	YWHAH
TMSB4X	5.93171e-180	-0.804309	1	1	1.25432e-175	Malignant	TMSB4X
GMFG	3.92765e-179	-0.957509	0.23	0.558	8.30541e-175	Malignant	GMFG
CYB5A	8.76813e-179	0.830635	0.926	0.634	1.85411e-174	Malignant	CYB5A
IL1B	3.91141e-175	-2.44597	0.072	0.283	8.27106e-171	Malignant	IL1B
TACSTD2	5.2667e-175	0.850589	0.98	0.729	1.1137e-170	Malignant	TACSTD2
ARID5A	1.14994e-174	-0.613145	0.057	0.253	2.43166e-170	Malignant	ARID5A
AGR2	2.16261e-173	1.01832	0.887	0.554	4.57306e-169	Malignant	AGR2
PPP1R18	4.46767e-169	-0.532952	0.068	0.277	9.44733e-165	Malignant	PPP1R18
SMIM22	1.62782e-168	0.792454	0.939	0.554	3.44218e-164	Malignant	SMIM22
TCF4	1.15294e-167	-0.826529	0.062	0.259	2.43801e-163	Malignant	TCF4
ELF3	7.12648e-167	0.928035	0.964	0.688	1.50696e-162	Malignant	ELF3
KRT7	1.213e-165	0.832217	0.969	0.734	2.56501e-161	Malignant	KRT7
HLA-DRB1	4.65783e-165	-2.9217	0.423	0.676	9.84944e-161	Malignant	HLA-DRB1
PPDPF	5.85338e-165	0.807578	0.994	0.869	1.23776e-160	Malignant	PPDPF
COTL1	1.12496e-164	-1.55725	0.306	0.581	2.37884e-160	Malignant	COTL1
ADIRF	1.38151e-163	1.21542	0.966	0.93	2.92135e-159	Malignant	ADIRF
AKR1C2	9.62056e-159	0.850842	0.897	0.543	2.03436e-154	Malignant	AKR1C2
RGCC	2.21974e-158	-1.78852	0.108	0.346	4.69386e-154	Malignant	RGCC
RAB31	1.57401e-157	-0.874027	0.127	0.367	3.32841e-153	Malignant	RAB31
HLA-DRA	9.65682e-155	-3.74675	0.484	0.699	2.04203e-150	Malignant	HLA-DRA
SDC1	1.73004e-153	0.800133	0.897	0.526	3.65834e-149	Malignant	SDC1
HPGD	8.09147e-152	1.02721	0.834	0.486	1.71102e-147	Malignant	HPGD
KLF5	8.84944e-148	0.820155	0.831	0.442	1.8713e-143	Malignant	KLF5
UQCRH	1.1633e-144	0.657244	0.983	0.923	2.45992e-140	Malignant	UQCRH
APOE	3.16389e-144	-4.08177	0.161	0.402	6.69037e-140	Malignant	APOE
VSIG2	1.02903e-141	0.9126	0.795	0.454	2.17598e-137	Malignant	VSIG2
AKR1C3	4.6789e-140	1.05219	0.817	0.493	9.89399e-136	Malignant	AKR1C3
GPX2	3.46265e-139	0.840358	0.901	0.585	7.32212e-135	Malignant	GPX2
ARL4C	2.83921e-135	-0.714666	0.081	0.277	6.00379e-131	Malignant	ARL4C
TMSB10	3.17408e-131	-0.614638	0.998	1	6.71192e-127	Malignant	TMSB10
FABP5	8.90774e-131	0.953179	0.963	0.812	1.88363e-126	Malignant	FABP5
RAB25	1.08691e-130	0.737902	0.732	0.357	2.29838e-126	Malignant	RAB25
CSTB	8.20209e-130	1.17188	0.974	0.939	1.73441e-125	Malignant	CSTB
HLA-C	2.37856e-128	-0.974039	0.889	0.935	5.02971e-124	Malignant	HLA-C
PSCA	8.52106e-128	0.845351	0.968	0.818	1.80186e-123	Malignant	PSCA
TSTD1	2.02637e-127	0.655308	0.858	0.512	4.28497e-123	Malignant	TSTD1
DAB2	1.13007e-126	-0.657752	0.078	0.266	2.38965e-122	Malignant	DAB2
PERP	1.09585e-125	0.673287	0.932	0.561	2.31729e-121	Malignant	PERP
SERINC2	1.78803e-125	0.737212	0.809	0.452	3.78098e-121	Malignant	SERINC2
CTSB	5.5973e-124	-1.45512	0.573	0.73	1.18361e-119	Malignant	CTSB
SERPINA1	5.82507e-124	-0.686496	0.077	0.265	1.23177e-119	Malignant	SERPINA1
DHRS2	7.64884e-123	0.977851	0.82	0.53	1.61742e-118	Malignant	DHRS2
SNCG	1.21041e-119	0.908792	0.925	0.677	2.55954e-115	Malignant	SNCG
LCP1	3.24346e-119	-0.573804	0.074	0.251	6.85862e-115	Malignant	LCP1
GATA3	1.43295e-118	0.755016	0.781	0.433	3.03012e-114	Malignant	GATA3
RPL23A	2.05161e-118	0.416074	1	1	4.33833e-114	Malignant	RPL23A
RPL41	1.20568e-117	0.479883	1	1	2.54952e-113	Malignant	RPL41
RPS21	1.71962e-117	0.449806	0.999	0.984	3.6363e-113	Malignant	RPS21
STOM	6.47858e-117	-0.723042	0.111	0.318	1.36996e-112	Malignant	STOM
TSC22D3	1.03634e-114	-1.13604	0.389	0.616	2.19144e-110	Malignant	TSC22D3
RPL30	6.19407e-114	0.4765	0.999	0.996	1.3098e-109	Malignant	RPL30
S100A6	3.42391e-113	0.887659	0.998	0.999	7.2402e-109	Malignant	S100A6
CLDN4	1.18129e-112	0.933912	0.907	0.748	2.49796e-108	Malignant	CLDN4
CD74	1.20848e-111	-2.86446	0.785	0.869	2.55545e-107	Malignant	CD74
HLA-B	2.32949e-111	-0.930989	0.927	0.973	4.92594e-107	Malignant	HLA-B
CD24	1.48542e-110	1.22934	0.755	0.465	3.14106e-106	Malignant	CD24
CXADR	5.08068e-109	0.626103	0.745	0.381	1.07436e-104	Malignant	CXADR
SPINT2	1.35935e-106	0.634679	0.899	0.658	2.87448e-102	Malignant	SPINT2
LINC00152	1.48651e-106	-0.851513	0.14	0.356	3.14336e-102	Malignant	LINC00152
MT2A	2.14185e-100	-1.88103	0.388	0.601	4.52915e-96	Malignant	MT2A
TP53TG1	8.83149e-100	0.578723	0.791	0.48	1.86751e-95	Malignant	TP53TG1
OCIAD2	4.68433e-99	0.564974	0.837	0.51	9.90547e-95	Malignant	OCIAD2
RPS28	1.36697e-98	0.362627	1	0.998	2.8906e-94	Malignant	RPS28
AQP3	1.6177e-98	0.741067	0.756	0.434	3.42078e-94	Malignant	AQP3
RPL37	2.3607e-98	0.454388	1	0.995	4.99194e-94	Malignant	RPL37
S100A4	2.15309e-97	-0.540166	0.559	0.828	4.55292e-93	Malignant	S100A4
FABP6	7.42315e-97	0.61065	0.56	0.219	1.5697e-92	Malignant	FABP6
KLF2	6.05739e-96	-0.88971	0.086	0.251	1.2809e-91	Malignant	KLF2
RPLP0	1.77383e-95	0.518191	0.994	0.989	3.75094e-91	Malignant	RPLP0
GPSM3	1.16039e-94	-0.7396	0.189	0.397	2.45377e-90	Malignant	GPSM3
ID1	4.09101e-94	0.82449	0.967	0.824	8.65085e-90	Malignant	ID1
TYMP	1.58507e-93	-1.23409	0.388	0.588	3.3518e-89	Malignant	TYMP
KRT18	1.1783e-92	0.680673	0.936	0.718	2.49164e-88	Malignant	KRT18
SCCPDH	1.40359e-92	0.631437	0.768	0.464	2.96803e-88	Malignant	SCCPDH
RPS2	1.58259e-92	0.433608	1	0.999	3.34656e-88	Malignant	RPS2
RPL36	9.52485e-92	0.425999	1	0.998	2.01412e-87	Malignant	RPL36
CD68	1.24633e-91	-1.46895	0.235	0.426	2.6355e-87	Malignant	CD68
CMTM3	3.39371e-90	-0.514213	0.101	0.273	7.17635e-86	Malignant	CMTM3
PPT1	5.70323e-90	-0.781385	0.246	0.449	1.20601e-85	Malignant	PPT1
EHF	2.66908e-89	0.601386	0.574	0.253	5.64403e-85	Malignant	EHF
IL32	1.90824e-88	-1.2057	0.171	0.369	4.03515e-84	Malignant	IL32
CLDN7	2.1489e-88	0.652021	0.638	0.328	4.54407e-84	Malignant	CLDN7
ARPC1B	6.76121e-88	-0.783292	0.707	0.804	1.42973e-83	Malignant	ARPC1B
SPINK1	1.20066e-87	1.07192	0.846	0.82	2.53892e-83	Malignant	SPINK1
PSAP	2.95704e-87	-1.15061	0.754	0.829	6.25295e-83	Malignant	PSAP
HLA-A	1.84493e-86	-0.783765	0.872	0.922	3.9013e-82	Malignant	HLA-A
RPS18	2.47072e-86	0.426571	1	0.999	5.22458e-82	Malignant	RPS18
RPL19	4.15723e-86	0.299027	1	1	8.79088e-82	Malignant	RPL19
HLA-DMA	4.50713e-86	-1.51481	0.37	0.54	9.53077e-82	Malignant	HLA-DMA
RHOG	1.49992e-85	-0.780136	0.217	0.412	3.17172e-81	Malignant	RHOG
S100A2	2.04826e-84	0.675986	0.867	0.645	4.33126e-80	Malignant	S100A2
FXYD5	2.55657e-84	-0.695507	0.502	0.699	5.40613e-80	Malignant	FXYD5
PLPP2	3.24113e-84	0.542535	0.643	0.32	6.85369e-80	Malignant	PLPP2
CYP4B1	9.47876e-84	0.705961	0.684	0.379	2.00438e-79	Malignant	CYP4B1
CALD1	3.19996e-83	-2.20402	0.114	0.276	6.76663e-79	Malignant	CALD1
MAL2	4.31356e-83	0.688909	0.519	0.222	9.12145e-79	Malignant	MAL2
G0S2	1.43653e-82	-1.90298	0.117	0.289	3.03768e-78	Malignant	G0S2
MAFB	2.08852e-82	-0.890068	0.143	0.325	4.41639e-78	Malignant	MAFB
FAM213A	1.73253e-81	0.561134	0.748	0.471	3.6636e-77	Malignant	FAM213A
BTBD16	1.07371e-80	0.632041	0.526	0.231	2.27046e-76	Malignant	BTBD16
GSTP1	2.95378e-80	0.523511	0.979	0.941	6.24606e-76	Malignant	GSTP1
RPL37A	1.33658e-79	0.355187	0.999	0.997	2.82632e-75	Malignant	RPL37A
SAT1	1.48272e-79	-1.13106	0.904	0.949	3.13536e-75	Malignant	SAT1
MDK	2.00863e-79	0.732356	0.824	0.585	4.24745e-75	Malignant	MDK
ZFAS1	8.36424e-79	0.538917	0.939	0.793	1.7687e-74	Malignant	ZFAS1
UQCRQ	2.53035e-78	0.466308	0.989	0.92	5.35068e-74	Malignant	UQCRQ
KRT17	2.76623e-78	0.795901	0.901	0.826	5.84947e-74	Malignant	KRT17
TXNDC17	2.94891e-78	0.575674	0.876	0.677	6.23577e-74	Malignant	TXNDC17
DUSP1	9.39048e-78	-0.952317	0.759	0.879	1.98571e-73	Malignant	DUSP1
HES1	1.12573e-76	0.646438	0.916	0.695	2.38046e-72	Malignant	HES1
CTSZ	1.25586e-76	-0.899257	0.25	0.432	2.65564e-72	Malignant	CTSZ
CAMK2N1	1.81202e-76	0.747263	0.655	0.374	3.8317e-72	Malignant	CAMK2N1
CYBA	1.50632e-75	-0.988271	0.881	0.895	3.18526e-71	Malignant	CYBA
HLA-DRB5	1.71942e-75	-2.24715	0.317	0.503	3.63589e-71	Malignant	HLA-DRB5
RPL39	3.05657e-75	0.393934	1	1	6.46343e-71	Malignant	RPL39
RAC2	3.46503e-75	-0.594622	0.102	0.255	7.32716e-71	Malignant	RAC2
ARHGDIB	5.32758e-75	-0.863545	0.716	0.759	1.12657e-70	Malignant	ARHGDIB
IFITM3	5.96219e-75	-1.46333	0.641	0.735	1.26076e-70	Malignant	IFITM3
SRI	6.53995e-75	0.636552	0.847	0.671	1.38294e-70	Malignant	SRI
GPX1	5.98137e-74	-1.0679	0.923	0.93	1.26482e-69	Malignant	GPX1
GNAI2	9.87344e-74	-0.736703	0.277	0.458	2.08784e-69	Malignant	GNAI2
SFN	1.2008e-73	0.800865	0.78	0.545	2.53921e-69	Malignant	SFN
TMEM97	1.33127e-73	0.950145	0.563	0.295	2.8151e-69	Malignant	TMEM97
RPLP1	1.56384e-73	0.274523	1	1	3.3069e-69	Malignant	RPLP1
RPS8	6.11054e-73	0.397638	1	0.999	1.29214e-68	Malignant	RPS8
PRDX2	1.12843e-72	0.510625	0.856	0.646	2.38618e-68	Malignant	PRDX2
MPZL2	3.79361e-72	0.485781	0.667	0.363	8.02196e-68	Malignant	MPZL2
FLNA	6.86761e-72	-0.637457	0.108	0.262	1.45223e-67	Malignant	FLNA
PABPC1	9.92299e-72	0.491643	0.965	0.906	2.09832e-67	Malignant	PABPC1
RPL22	5.34704e-71	0.350063	0.996	0.991	1.13069e-66	Malignant	RPL22
TNFAIP3	6.53445e-71	-0.948287	0.228	0.411	1.38177e-66	Malignant	TNFAIP3
SELM	1.15897e-70	-1.13091	0.177	0.347	2.45076e-66	Malignant	SELM
CRTAC1	1.40202e-70	0.845728	0.48	0.217	2.96471e-66	Malignant	CRTAC1
CTSE	3.41756e-70	0.703568	0.444	0.182	7.22678e-66	Malignant	CTSE
C10orf99	3.50458e-70	0.683616	0.557	0.273	7.41078e-66	Malignant	C10orf99
RPL35A	3.94327e-70	0.349716	1	0.997	8.33845e-66	Malignant	RPL35A
JUP	6.25437e-70	0.565987	0.624	0.347	1.32255e-65	Malignant	JUP
C16orf74	5.20286e-69	0.494277	0.513	0.237	1.1002e-64	Malignant	C16orf74
KRT10	7.16906e-69	0.462682	0.902	0.711	1.51597e-64	Malignant	KRT10
PCBD1	1.6462e-68	0.488517	0.76	0.509	3.48106e-64	Malignant	PCBD1
CTSC	1.67967e-68	-0.815231	0.46	0.634	3.55183e-64	Malignant	CTSC
RHOA	4.90124e-68	-0.561658	0.757	0.841	1.03642e-63	Malignant	RHOA
TMEM54	1.94234e-67	0.512567	0.57	0.301	4.10727e-63	Malignant	TMEM54
TOB1	2.88759e-67	0.544704	0.777	0.503	6.10609e-63	Malignant	TOB1
KRTCAP3	2.02499e-66	0.469455	0.505	0.23	4.28205e-62	Malignant	KRTCAP3
AKR1C1	1.30538e-65	0.686379	0.515	0.254	2.76035e-61	Malignant	AKR1C1
PPARG	2.16867e-65	0.446237	0.504	0.223	4.58588e-61	Malignant	PPARG
SHFM1	2.42372e-65	0.402536	0.951	0.836	5.1252e-61	Malignant	SHFM1
BTG2	7.65033e-65	0.794885	0.856	0.755	1.61774e-60	Malignant	BTG2
GADD45B	8.13417e-65	-1.03755	0.557	0.696	1.72005e-60	Malignant	GADD45B
RP11-532F12.5	8.37643e-65	0.442529	0.522	0.247	1.77128e-60	Malignant	RP11-532F12.5
S100A11	9.33164e-65	0.347704	1	0.996	1.97327e-60	Malignant	S100A11
UQCR10	1.56099e-64	0.486742	0.976	0.902	3.30086e-60	Malignant	UQCR10
COX7C	1.6338e-64	0.340351	0.997	0.976	3.45484e-60	Malignant	COX7C
HLA-E	1.77016e-64	-0.711049	0.783	0.838	3.74318e-60	Malignant	HLA-E
VAMP5	1.77451e-64	-0.741888	0.22	0.399	3.75239e-60	Malignant	VAMP5
TUBA1B	2.15269e-64	-0.831381	0.742	0.825	4.55207e-60	Malignant	TUBA1B
ARHGAP18	2.94454e-64	-0.48	0.11	0.257	6.22652e-60	Malignant	ARHGAP18
C10orf54	8.37603e-64	-0.752296	0.194	0.36	1.7712e-59	Malignant	C10orf54
CAPS	1.25233e-63	0.617209	0.594	0.338	2.64817e-59	Malignant	CAPS
NQO1	1.5701e-63	0.567665	0.54	0.281	3.32014e-59	Malignant	NQO1
LYPD3	2.04123e-63	0.562242	0.626	0.356	4.31639e-59	Malignant	LYPD3
PRDX5	2.16264e-63	0.40977	0.978	0.87	4.57312e-59	Malignant	PRDX5
CDC42EP5	1.05837e-62	0.545748	0.497	0.241	2.23803e-58	Malignant	CDC42EP5
OVOL1	1.26621e-62	0.63511	0.491	0.231	2.67752e-58	Malignant	OVOL1
PVRL4	1.73362e-62	0.47246	0.501	0.237	3.6659e-58	Malignant	PVRL4
C19orf33	2.06613e-62	0.483913	0.697	0.417	4.36904e-58	Malignant	C19orf33
DDAH2	7.34764e-62	-0.505752	0.165	0.33	1.55373e-57	Malignant	DDAH2
CALM2	9.39055e-62	-0.466552	0.94	0.957	1.98573e-57	Malignant	CALM2
CARD16	1.01287e-61	-0.567012	0.178	0.342	2.14182e-57	Malignant	CARD16
RPL31	1.10562e-61	0.429688	1	0.997	2.33795e-57	Malignant	RPL31
FBP1	2.05705e-61	0.580071	0.611	0.359	4.34984e-57	Malignant	FBP1
WFDC2	2.56508e-61	0.56237	0.615	0.341	5.42411e-57	Malignant	WFDC2
PTGR1	6.43329e-61	0.639815	0.547	0.303	1.36038e-56	Malignant	PTGR1
PSMB9	8.21626e-61	-0.644247	0.323	0.492	1.73741e-56	Malignant	PSMB9
TESC	1.10543e-60	0.631875	0.558	0.301	2.33754e-56	Malignant	TESC
LPAR6	3.51644e-60	-0.686031	0.191	0.353	7.43586e-56	Malignant	LPAR6
TLN1	7.03772e-60	-0.416465	0.113	0.257	1.4882e-55	Malignant	TLN1
NGFRAP1	1.41378e-59	0.428131	0.906	0.698	2.98959e-55	Malignant	NGFRAP1
SPOCD1	1.48513e-59	0.635334	0.401	0.161	3.14046e-55	Malignant	SPOCD1
HOOK2	4.20423e-59	0.438072	0.562	0.298	8.89027e-55	Malignant	HOOK2
TNFRSF21	6.84375e-59	0.463956	0.635	0.374	1.44718e-54	Malignant	TNFRSF21
TRAF4	9.01874e-59	0.585095	0.607	0.357	1.9071e-54	Malignant	TRAF4
RPL32	3.78007e-58	0.318918	1	1	7.99334e-54	Malignant	RPL32
FCGRT	4.53162e-58	-0.943571	0.477	0.587	9.58256e-54	Malignant	FCGRT
SGK1	4.63043e-58	-0.798739	0.292	0.477	9.7915e-54	Malignant	SGK1
CAPZB	5.07777e-58	-0.579278	0.693	0.763	1.07374e-53	Malignant	CAPZB
EPCAM	5.82354e-58	0.431551	0.456	0.201	1.23145e-53	Malignant	EPCAM
NACA	1.0897e-57	0.338107	0.988	0.985	2.30427e-53	Malignant	NACA
ERRFI1	1.42636e-57	0.680953	0.598	0.359	3.01619e-53	Malignant	ERRFI1
ID2	2.0182e-57	-0.756111	0.632	0.742	4.26769e-53	Malignant	ID2
APOL1	3.82671e-57	0.502072	0.526	0.279	8.09196e-53	Malignant	APOL1
PFN2	6.45124e-57	0.402097	0.597	0.325	1.36418e-52	Malignant	PFN2
SYT8	7.71694e-57	0.523111	0.666	0.407	1.63182e-52	Malignant	SYT8
ATP6V1B2	1.97855e-56	-0.492154	0.113	0.251	4.18384e-52	Malignant	ATP6V1B2
FAM162A	6.75106e-56	0.564682	0.786	0.574	1.42758e-51	Malignant	FAM162A
RB1	1.80108e-55	-0.618101	0.14	0.28	3.80857e-51	Malignant	RB1
CXCL2	1.88204e-55	-1.19346	0.143	0.295	3.97977e-51	Malignant	CXCL2
ROMO1	6.11152e-55	0.383337	0.91	0.727	1.29234e-50	Malignant	ROMO1
H2AFJ	1.2165e-54	0.520298	0.849	0.675	2.5724e-50	Malignant	H2AFJ
CST3	1.29872e-54	-0.861233	0.986	0.979	2.74627e-50	Malignant	CST3
MAOA	1.74104e-54	0.400182	0.495	0.241	3.6816e-50	Malignant	MAOA
CRB3	2.32228e-54	0.434629	0.43	0.196	4.9107e-50	Malignant	CRB3
RPS6	3.02191e-54	0.516689	1	0.999	6.39014e-50	Malignant	RPS6
RPS7	3.74972e-54	0.304816	0.999	0.996	7.92915e-50	Malignant	RPS7
LYPD6B	5.93595e-54	0.367402	0.393	0.158	1.25522e-49	Malignant	LYPD6B
LSR	7.13935e-54	0.424424	0.557	0.307	1.50969e-49	Malignant	LSR
RPL14	8.832e-54	0.28522	0.999	0.997	1.86761e-49	Malignant	RPL14
CFL1	9.87531e-54	-0.371499	0.981	0.98	2.08823e-49	Malignant	CFL1
RPL13A	1.18392e-53	0.328648	1	1	2.50353e-49	Malignant	RPL13A
IDH1	5.70177e-53	0.447643	0.706	0.472	1.2057e-48	Malignant	IDH1
LAD1	7.65785e-53	0.397484	0.509	0.259	1.61933e-48	Malignant	LAD1
RPS5	1.31305e-52	0.297062	0.999	0.99	2.77658e-48	Malignant	RPS5
NPC2	1.37737e-52	-1.02382	0.892	0.885	2.91259e-48	Malignant	NPC2
ACTN1	2.94389e-52	-0.661766	0.154	0.296	6.22516e-48	Malignant	ACTN1
CD99	7.65161e-52	-0.866029	0.449	0.573	1.61801e-47	Malignant	CD99
TMEM134	9.91792e-52	0.451971	0.692	0.466	2.09724e-47	Malignant	TMEM134
PHLDA3	1.04684e-51	0.535944	0.515	0.288	2.21364e-47	Malignant	PHLDA3
CREM	1.29e-51	-0.796356	0.21	0.354	2.72783e-47	Malignant	CREM
TSPAN13	3.39154e-51	0.365092	0.563	0.31	7.17176e-47	Malignant	TSPAN13
KRT13	3.45069e-51	0.827718	0.662	0.465	7.29683e-47	Malignant	KRT13
IGFBP3	5.36759e-51	0.345354	0.619	0.386	1.13503e-46	Malignant	IGFBP3
HINT1	5.60001e-51	0.375681	0.971	0.924	1.18418e-46	Malignant	HINT1
SH3BGRL3	9.29455e-51	-0.491006	0.944	0.943	1.96543e-46	Malignant	SH3BGRL3
HEBP2	1.11318e-50	0.485862	0.699	0.473	2.35392e-46	Malignant	HEBP2
MIF	1.47957e-50	0.437426	0.891	0.72	3.1287e-46	Malignant	MIF
RPL8	1.72015e-50	0.300708	1	0.998	3.63743e-46	Malignant	RPL8
RPL24	2.43818e-50	0.27833	0.998	0.991	5.15579e-46	Malignant	RPL24
HSD17B2	3.15312e-50	0.489082	0.44	0.211	6.66759e-46	Malignant	HSD17B2
HSPA1B	3.6947e-50	-0.90637	0.733	0.797	7.81281e-46	Malignant	HSPA1B
FAM3B	9.06659e-50	0.491972	0.487	0.255	1.91722e-45	Malignant	FAM3B
UPK1B	9.5338e-50	0.811913	0.369	0.163	2.01602e-45	Malignant	UPK1B
DMKN	1.47584e-49	0.4837	0.592	0.345	3.12081e-45	Malignant	DMKN
RPL11	1.96077e-49	0.281478	1	1	4.14624e-45	Malignant	RPL11
PAFAH1B3	2.32459e-49	0.400513	0.52	0.278	4.91557e-45	Malignant	PAFAH1B3
RP11-44F21.5	4.56995e-49	0.353038	0.418	0.189	9.66361e-45	Malignant	RP11-44F21.5
CLU	5.02592e-49	0.414905	0.681	0.453	1.06278e-44	Malignant	CLU
RPL3	8.05949e-49	0.367648	1	0.998	1.70426e-44	Malignant	RPL3
GRN	1.44011e-48	-0.819518	0.759	0.791	3.04526e-44	Malignant	GRN
SLPI	1.63349e-48	0.634719	0.69	0.454	3.45419e-44	Malignant	SLPI
AP1M2	4.43992e-48	0.332215	0.391	0.169	9.38864e-44	Malignant	AP1M2
CAP1	5.13281e-48	-0.577862	0.6	0.67	1.08538e-43	Malignant	CAP1
AIG1	6.74503e-48	0.389912	0.634	0.4	1.4263e-43	Malignant	AIG1
AC090498.1	1.07326e-47	0.416004	0.811	0.607	2.26952e-43	Malignant	AC090498.1
SSH3	1.38316e-47	0.333767	0.427	0.198	2.92484e-43	Malignant	SSH3
SLC2A1	1.80768e-47	0.484056	0.485	0.254	3.82253e-43	Malignant	SLC2A1
SPTSSB	2.91079e-47	0.581911	0.444	0.223	6.15516e-43	Malignant	SPTSSB
KTN1	3.64503e-47	0.35653	0.888	0.699	7.70777e-43	Malignant	KTN1
RPS27A	4.11091e-47	0.285562	0.999	1	8.69294e-43	Malignant	RPS27A
SERPINB5	4.33266e-47	0.422418	0.433	0.209	9.16184e-43	Malignant	SERPINB5
SYTL1	5.87566e-47	0.368264	0.481	0.246	1.24247e-42	Malignant	SYTL1
CD9	8.74579e-47	0.379605	0.964	0.822	1.84938e-42	Malignant	CD9
THEM6	1.44213e-46	0.359416	0.403	0.187	3.04952e-42	Malignant	THEM6
GPRC5C	1.96e-46	0.371742	0.467	0.237	4.14461e-42	Malignant	GPRC5C
CTSL	2.97296e-46	-0.686454	0.235	0.384	6.28661e-42	Malignant	CTSL
NUDT4	6.82118e-46	0.390872	0.671	0.441	1.44241e-41	Malignant	NUDT4
NDUFC1	7.08984e-46	0.353278	0.817	0.611	1.49922e-41	Malignant	NDUFC1
MYL12A	9.19601e-46	-0.5083	0.888	0.898	1.94459e-41	Malignant	MYL12A
CROT	1.49087e-45	0.389842	0.469	0.239	3.15259e-41	Malignant	CROT
IRF6	1.85658e-45	0.339389	0.446	0.217	3.92592e-41	Malignant	IRF6
TSPO	2.13055e-45	0.34594	0.958	0.869	4.50527e-41	Malignant	TSPO
GSTM3	2.26177e-45	0.993498	0.698	0.551	4.78273e-41	Malignant	GSTM3
BCAS1	2.47243e-45	0.34057	0.407	0.191	5.2282e-41	Malignant	BCAS1
BLCAP	3.3256e-45	0.40848	0.586	0.36	7.03231e-41	Malignant	BLCAP
TPP1	3.85798e-45	-0.511496	0.209	0.348	8.15808e-41	Malignant	TPP1
TXN	4.89782e-45	0.410039	0.936	0.838	1.03569e-40	Malignant	TXN
CTSS	2.32858e-44	-0.876358	0.372	0.491	4.92401e-40	Malignant	CTSS
SPINT1	2.40192e-44	0.382978	0.556	0.331	5.0791e-40	Malignant	SPINT1
NSG1	2.80845e-44	0.429222	0.453	0.24	5.93875e-40	Malignant	NSG1
ATPIF1	4.0563e-44	0.349224	0.895	0.751	8.57744e-40	Malignant	ATPIF1
MAST4	4.12783e-44	0.338608	0.517	0.28	8.72872e-40	Malignant	MAST4
TMEM14A	5.80168e-44	0.368957	0.671	0.438	1.22682e-39	Malignant	TMEM14A
MZT2A	9.38853e-44	0.393737	0.796	0.586	1.9853e-39	Malignant	MZT2A
CALM1	1.29313e-43	-0.543632	0.858	0.874	2.73445e-39	Malignant	CALM1
COLCA1	1.59825e-43	0.319769	0.294	0.103	3.37966e-39	Malignant	COLCA1
SH3BGRL	1.74525e-43	-0.5163	0.59	0.66	3.6905e-39	Malignant	SH3BGRL
ATP8B1	2.53049e-43	0.320388	0.392	0.183	5.35097e-39	Malignant	ATP8B1
RPS3	3.57126e-43	0.281735	0.999	1	7.55179e-39	Malignant	RPS3
PTMA	4.37706e-43	-0.328423	0.999	1	9.25573e-39	Malignant	PTMA
RPS27	5.64746e-43	0.286871	1	1	1.19421e-38	Malignant	RPS27
IGFBP5	7.16376e-43	0.665419	0.427	0.222	1.51485e-38	Malignant	IGFBP5
NDFIP2	7.76062e-43	0.34676	0.527	0.289	1.64106e-38	Malignant	NDFIP2
DDT	8.47266e-43	0.457978	0.841	0.662	1.79163e-38	Malignant	DDT
C15orf48	9.09971e-43	-0.972376	0.158	0.288	1.92422e-38	Malignant	C15orf48
RPL10A	1.17424e-42	0.366198	0.998	0.995	2.48304e-38	Malignant	RPL10A
RALBP1	1.20499e-42	0.678117	0.618	0.426	2.54808e-38	Malignant	RALBP1
APOC1	1.73745e-42	-2.65452	0.319	0.43	3.67402e-38	Malignant	APOC1
EPSTI1	1.76702e-42	-0.524131	0.142	0.27	3.73653e-38	Malignant	EPSTI1
SH3YL1	3.42188e-42	0.342717	0.613	0.379	7.23591e-38	Malignant	SH3YL1
GIPC1	3.44207e-42	0.360473	0.515	0.298	7.2786e-38	Malignant	GIPC1
LY6D	4.36997e-42	0.839227	0.575	0.383	9.24074e-38	Malignant	LY6D
EPHA2	4.5065e-42	0.383428	0.432	0.221	9.52944e-38	Malignant	EPHA2
TINAGL1	5.55613e-42	0.390711	0.649	0.41	1.1749e-37	Malignant	TINAGL1
CA12	7.58161e-42	0.343442	0.358	0.159	1.60321e-37	Malignant	CA12
HMGCS2	8.03694e-42	0.621928	0.471	0.271	1.69949e-37	Malignant	HMGCS2
MRPS33	1.12689e-41	0.372703	0.684	0.462	2.38292e-37	Malignant	MRPS33
ANXA10	1.20563e-41	0.423349	0.27	0.092	2.54943e-37	Malignant	ANXA10
RPS10	1.20856e-41	0.362106	0.959	0.915	2.55562e-37	Malignant	RPS10
TSPAN6	1.35355e-41	0.340697	0.48	0.252	2.86221e-37	Malignant	TSPAN6
LIMS1	1.5974e-41	-0.564959	0.413	0.525	3.37786e-37	Malignant	LIMS1
SNRPE	3.18419e-41	0.313422	0.899	0.761	6.73328e-37	Malignant	SNRPE
CAPG	4.26016e-41	-0.835423	0.61	0.669	9.00852e-37	Malignant	CAPG
WDR72	4.8924e-41	0.329572	0.285	0.101	1.03455e-36	Malignant	WDR72
SYPL1	7.71931e-41	0.369986	0.811	0.59	1.63233e-36	Malignant	SYPL1
PHLDA2	7.89067e-41	0.864733	0.85	0.743	1.66856e-36	Malignant	PHLDA2
MSMO1	8.974e-41	0.442556	0.417	0.213	1.89764e-36	Malignant	MSMO1
IL20RA	9.66693e-41	0.275466	0.296	0.11	2.04417e-36	Malignant	IL20RA
FBLN1	1.15213e-40	0.375048	0.627	0.407	2.43629e-36	Malignant	FBLN1
FERMT1	1.70027e-40	0.290562	0.32	0.128	3.59539e-36	Malignant	FERMT1
SNRPD2	2.19596e-40	0.29569	0.959	0.886	4.64358e-36	Malignant	SNRPD2
RHOV	2.28832e-40	0.449986	0.473	0.258	4.83887e-36	Malignant	RHOV
SCN11A	2.65691e-40	0.412209	0.271	0.098	5.61831e-36	Malignant	SCN11A
PRSS22	3.40532e-40	0.481564	0.386	0.194	7.20089e-36	Malignant	PRSS22
HOXB7	3.62587e-40	0.28929	0.428	0.215	7.66727e-36	Malignant	HOXB7
HS3ST1	4.22398e-40	0.371114	0.375	0.181	8.93202e-36	Malignant	HS3ST1
STAP2	4.55147e-40	0.321721	0.469	0.253	9.62454e-36	Malignant	STAP2
PTP4A2	4.85178e-40	0.360616	0.772	0.566	1.02596e-35	Malignant	PTP4A2
DDR1	6.91451e-40	0.293271	0.388	0.183	1.46214e-35	Malignant	DDR1
F11R	8.12864e-40	0.314216	0.431	0.223	1.71888e-35	Malignant	F11R
CRABP2	9.728e-40	0.635417	0.575	0.384	2.05708e-35	Malignant	CRABP2
LIPH	1.26598e-39	0.495421	0.361	0.166	2.67705e-35	Malignant	LIPH
PADI3	1.5104e-39	0.404055	0.38	0.186	3.1939e-35	Malignant	PADI3
STEAP1	1.68433e-39	0.357359	0.332	0.143	3.56169e-35	Malignant	STEAP1
SNHG18	2.21747e-39	0.37427	0.444	0.235	4.68907e-35	Malignant	SNHG18
PLAUR	2.23331e-39	-1.16329	0.358	0.489	4.72256e-35	Malignant	PLAUR
SOD1	2.4851e-39	0.308552	0.947	0.86	5.255e-35	Malignant	SOD1
OST4	4.13957e-39	0.257311	0.984	0.944	8.75354e-35	Malignant	OST4
BTF3	9.0048e-39	0.353969	0.977	0.96	1.90415e-34	Malignant	BTF3
PNRC1	1.52222e-38	-0.690095	0.67	0.722	3.21888e-34	Malignant	PNRC1
SDCBP	1.544e-38	-0.631416	0.601	0.665	3.26494e-34	Malignant	SDCBP
GID8	2.31573e-38	0.297266	0.495	0.283	4.89684e-34	Malignant	GID8
TMEM205	2.37038e-38	0.362868	0.664	0.446	5.01241e-34	Malignant	TMEM205
GADD45A	2.76193e-38	0.556431	0.63	0.435	5.84038e-34	Malignant	GADD45A
LINC00493	2.84895e-38	0.323799	0.827	0.642	6.0244e-34	Malignant	LINC00493
PIR	5.05655e-38	0.338782	0.345	0.158	1.06926e-33	Malignant	PIR
RPS4X	6.43826e-38	0.349146	0.999	0.997	1.36143e-33	Malignant	RPS4X
FAM84A	7.71724e-38	0.479064	0.455	0.253	1.63189e-33	Malignant	FAM84A
S100A16	1.085e-37	0.466477	0.674	0.471	2.29435e-33	Malignant	S100A16
CCND1	1.5346e-37	0.722837	0.721	0.563	3.24507e-33	Malignant	CCND1
MTX2	2.67272e-37	0.312391	0.492	0.285	5.65174e-33	Malignant	MTX2
PTPRF	3.08394e-37	0.271378	0.415	0.211	6.5213e-33	Malignant	PTPRF
ANXA1	4.90997e-37	-0.398162	0.533	0.675	1.03826e-32	Malignant	ANXA1
RPL23	7.73188e-37	0.25819	0.997	0.985	1.63498e-32	Malignant	RPL23
SNX31	1.05391e-36	0.355397	0.309	0.129	2.22859e-32	Malignant	SNX31
ICA1	1.25968e-36	0.271308	0.372	0.177	2.66372e-32	Malignant	ICA1
VGLL1	1.35847e-36	0.310648	0.3	0.124	2.87263e-32	Malignant	VGLL1
COX6A1	2.07468e-36	0.309302	0.975	0.938	4.38711e-32	Malignant	COX6A1
GCLC	2.43921e-36	0.445443	0.381	0.196	5.15796e-32	Malignant	GCLC
NR4A2	2.46966e-36	-0.729479	0.297	0.428	5.22233e-32	Malignant	NR4A2
CTSH	2.92544e-36	0.381088	0.858	0.726	6.18614e-32	Malignant	CTSH
SOWAHC	4.72991e-36	0.335288	0.39	0.195	1.00019e-31	Malignant	SOWAHC
FOSL1	7.26032e-36	0.438424	0.424	0.238	1.53527e-31	Malignant	FOSL1
SLC38A1	8.80149e-36	0.290696	0.471	0.264	1.86116e-31	Malignant	SLC38A1
GALNT1	1.06904e-35	0.314463	0.511	0.305	2.26058e-31	Malignant	GALNT1
MAPK13	1.08304e-35	0.275236	0.348	0.161	2.2902e-31	Malignant	MAPK13
LYPLA1	1.21031e-35	0.331989	0.767	0.556	2.55933e-31	Malignant	LYPLA1
ERBB3	1.24757e-35	0.310776	0.371	0.185	2.6381e-31	Malignant	ERBB3
LAMB3	1.37673e-35	0.316534	0.454	0.259	2.91124e-31	Malignant	LAMB3
CDH1	1.48385e-35	0.322887	0.419	0.222	3.13776e-31	Malignant	CDH1
RTN4	1.50055e-35	0.331875	0.931	0.815	3.17307e-31	Malignant	RTN4
STARD10	1.96503e-35	0.276764	0.347	0.164	4.15525e-31	Malignant	STARD10
LY6K	2.25096e-35	0.342302	0.311	0.135	4.75988e-31	Malignant	LY6K
HILPDA	2.27539e-35	0.665216	0.369	0.188	4.81154e-31	Malignant	HILPDA
TMEM30B	2.89661e-35	0.272259	0.32	0.14	6.12518e-31	Malignant	TMEM30B
EFNA1	3.06797e-35	0.296376	0.541	0.318	6.48754e-31	Malignant	EFNA1
C11orf1	3.35386e-35	0.25212	0.369	0.179	7.09207e-31	Malignant	C11orf1
FOXA1	6.40784e-35	0.292998	0.335	0.155	1.355e-30	Malignant	FOXA1
ARPC5	9.90235e-35	-0.389082	0.72	0.765	2.09395e-30	Malignant	ARPC5
PRDM1	1.08973e-34	-0.434761	0.153	0.276	2.30435e-30	Malignant	PRDM1
MSX2	2.38674e-34	0.268904	0.329	0.148	5.04699e-30	Malignant	MSX2
SLC44A3	2.49577e-34	0.255892	0.314	0.138	5.27756e-30	Malignant	SLC44A3
PLCXD2	2.5212e-34	0.28813	0.267	0.104	5.33132e-30	Malignant	PLCXD2
PLA2G2F	2.57264e-34	0.352014	0.323	0.149	5.4401e-30	Malignant	PLA2G2F
MSI2	3.19166e-34	0.271641	0.467	0.263	6.74908e-30	Malignant	MSI2
ATP1A4	5.79661e-34	0.286089	0.28	0.116	1.22575e-29	Malignant	ATP1A4
AP2S1	5.82059e-34	-0.45903	0.716	0.752	1.23082e-29	Malignant	AP2S1
TBX3	6.79203e-34	0.31091	0.475	0.274	1.43624e-29	Malignant	TBX3
TMEM40	6.84848e-34	0.283409	0.393	0.201	1.44818e-29	Malignant	TMEM40
TMPRSS4	9.01659e-34	0.279092	0.351	0.17	1.90665e-29	Malignant	TMPRSS4
FAM174B	9.47213e-34	0.266833	0.34	0.161	2.00298e-29	Malignant	FAM174B
ALG1L	1.00285e-33	0.253866	0.258	0.098	2.12064e-29	Malignant	ALG1L
MIEN1	1.15656e-33	0.313102	0.677	0.473	2.44567e-29	Malignant	MIEN1
AVPI1	1.18596e-33	0.423495	0.512	0.325	2.50783e-29	Malignant	AVPI1
RAB38	1.20492e-33	0.284153	0.345	0.165	2.54792e-29	Malignant	RAB38
RPL38	1.51676e-33	0.278171	0.997	0.992	3.20734e-29	Malignant	RPL38
ZNF331	1.60005e-33	-0.584685	0.195	0.318	3.38347e-29	Malignant	ZNF331
HACD3	1.79354e-33	0.260759	0.539	0.323	3.79262e-29	Malignant	HACD3
GPRC5A	2.03602e-33	0.492507	0.483	0.295	4.30537e-29	Malignant	GPRC5A
NFKBIA	2.26701e-33	-0.6485	0.81	0.867	4.79382e-29	Malignant	NFKBIA
TSPAN1	2.88884e-33	0.363153	0.414	0.224	6.10875e-29	Malignant	TSPAN1
EMP2	3.55225e-33	0.339019	0.614	0.414	7.5116e-29	Malignant	EMP2
EZR	4.37735e-33	0.307328	0.763	0.555	9.25633e-29	Malignant	EZR
NHP2	5.08771e-33	0.3046	0.793	0.601	1.07585e-28	Malignant	NHP2
RPS15A	9.4506e-33	0.269622	1	0.999	1.99842e-28	Malignant	RPS15A
TIMP1	1.11176e-32	-1.23287	0.756	0.747	2.35093e-28	Malignant	TIMP1
B4GALT4	1.13573e-32	0.254884	0.332	0.154	2.40161e-28	Malignant	B4GALT4
KLF3	1.41121e-32	0.315338	0.56	0.35	2.98414e-28	Malignant	KLF3
KCNJ15	1.70696e-32	0.253814	0.302	0.135	3.60955e-28	Malignant	KCNJ15
RPS17	1.76828e-32	0.282981	0.999	0.998	3.73921e-28	Malignant	RPS17
BEX2	1.9439e-32	0.255487	0.339	0.162	4.11058e-28	Malignant	BEX2
RHOC	2.33506e-32	-0.661345	0.516	0.589	4.93772e-28	Malignant	RHOC
PRELID3B	2.86984e-32	0.2754	0.5	0.298	6.06855e-28	Malignant	PRELID3B
AKR1B10	3.16796e-32	0.474215	0.256	0.104	6.69896e-28	Malignant	AKR1B10
ZFP36	3.46855e-32	-0.548208	0.79	0.845	7.33459e-28	Malignant	ZFP36
SDC4	3.50925e-32	0.383124	0.583	0.39	7.42067e-28	Malignant	SDC4
GTF2I	3.65975e-32	0.286826	0.615	0.413	7.7389e-28	Malignant	GTF2I
ZNF626	4.01046e-32	0.299642	0.373	0.194	8.48053e-28	Malignant	ZNF626
CTTN	4.50492e-32	0.334036	0.564	0.36	9.52611e-28	Malignant	CTTN
EI24	6.60108e-32	0.304819	0.634	0.429	1.39586e-27	Malignant	EI24
IGFBP2	8.4018e-32	0.470243	0.601	0.416	1.77664e-27	Malignant	IGFBP2
CLEC2B	8.55604e-32	-0.420922	0.309	0.439	1.80926e-27	Malignant	CLEC2B
FAM49B	9.42774e-32	-0.581831	0.388	0.475	1.99359e-27	Malignant	FAM49B
GSTM4	1.17078e-31	0.377183	0.449	0.268	2.47573e-27	Malignant	GSTM4
GATA3-AS1	1.40821e-31	0.250121	0.255	0.1	2.97781e-27	Malignant	GATA3-AS1
CDC42EP4	1.46287e-31	0.3489	0.359	0.188	3.09338e-27	Malignant	CDC42EP4
ATP5I	1.49407e-31	0.33314	0.964	0.874	3.15936e-27	Malignant	ATP5I
RILPL2	1.60588e-31	-0.506172	0.22	0.332	3.39579e-27	Malignant	RILPL2
EID1	1.78357e-31	-0.54278	0.656	0.695	3.77153e-27	Malignant	EID1
ARL6IP5	1.86452e-31	-0.467946	0.483	0.58	3.94272e-27	Malignant	ARL6IP5
CLDN1	2.79949e-31	0.292783	0.467	0.273	5.91979e-27	Malignant	CLDN1
TXNIP	3.67534e-31	-0.52217	0.443	0.557	7.77187e-27	Malignant	TXNIP
ERP27	3.83184e-31	0.296744	0.321	0.153	8.10281e-27	Malignant	ERP27
ASS1	4.02171e-31	0.296478	0.296	0.134	8.5043e-27	Malignant	ASS1
GATA2	4.39978e-31	0.361199	0.343	0.176	9.30378e-27	Malignant	GATA2
UGDH	4.94469e-31	0.303038	0.436	0.25	1.0456e-26	Malignant	UGDH
PDLIM1	6.59475e-31	0.268419	0.743	0.527	1.39453e-26	Malignant	PDLIM1
CCDC107	6.85518e-31	-0.439341	0.205	0.318	1.4496e-26	Malignant	CCDC107
CASP1	7.66967e-31	-0.442004	0.152	0.259	1.62183e-26	Malignant	CASP1
METTL7A	7.86745e-31	0.268188	0.407	0.221	1.66365e-26	Malignant	METTL7A
MFSD1	8.1547e-31	-0.474073	0.214	0.324	1.72439e-26	Malignant	MFSD1
ZYX	8.74126e-31	-0.437722	0.212	0.324	1.84843e-26	Malignant	ZYX
RAP1A	9.46025e-31	-0.439793	0.378	0.477	2.00047e-26	Malignant	RAP1A
UQCR11	1.55053e-30	0.264374	0.982	0.937	3.27875e-26	Malignant	UQCR11
CYR61	1.5524e-30	-1.3665	0.161	0.265	3.2827e-26	Malignant	CYR61
TNFAIP2	1.60308e-30	0.353028	0.559	0.373	3.38988e-26	Malignant	TNFAIP2
PEBP1	1.7763e-30	0.323721	0.837	0.736	3.75616e-26	Malignant	PEBP1
TBCA	2.48148e-30	0.292943	0.913	0.78	5.24734e-26	Malignant	TBCA
FDFT1	2.86096e-30	0.344138	0.59	0.398	6.04978e-26	Malignant	FDFT1
CAPNS2	2.87706e-30	0.282445	0.332	0.164	6.08384e-26	Malignant	CAPNS2
ATP5G2	3.8553e-30	0.260063	0.986	0.949	8.15242e-26	Malignant	ATP5G2
RPL13	4.94941e-30	0.288865	1	1	1.0466e-25	Malignant	RPL13
S100A14	5.66908e-30	0.544976	0.504	0.33	1.19878e-25	Malignant	S100A14
CKLF	7.8451e-30	-0.691486	0.543	0.6	1.65892e-25	Malignant	CKLF
RAB11FIP1	8.31102e-30	0.280766	0.506	0.307	1.75745e-25	Malignant	RAB11FIP1
CKB	1.11233e-29	0.747188	0.463	0.29	2.35213e-25	Malignant	CKB
CAPN1	1.3997e-29	0.292136	0.592	0.399	2.9598e-25	Malignant	CAPN1
RAB11A	1.40714e-29	0.284088	0.816	0.637	2.97553e-25	Malignant	RAB11A
DNAJB1	1.69434e-29	-0.661361	0.785	0.832	3.58284e-25	Malignant	DNAJB1
ATP6AP2	2.09929e-29	-0.45237	0.519	0.596	4.43916e-25	Malignant	ATP6AP2
JUN	2.34907e-29	-0.58164	0.795	0.842	4.96734e-25	Malignant	JUN
TRIM31	2.59034e-29	0.501495	0.314	0.155	5.47754e-25	Malignant	TRIM31
C20orf24	2.60911e-29	0.290725	0.62	0.431	5.51723e-25	Malignant	C20orf24
GGCT	2.68755e-29	0.308218	0.549	0.359	5.68309e-25	Malignant	GGCT
CLDN23	2.93033e-29	0.300606	0.288	0.134	6.19647e-25	Malignant	CLDN23
UPK2	3.84049e-29	0.827174	0.341	0.184	8.1211e-25	Malignant	UPK2
UPK3A	4.47023e-29	0.41476	0.391	0.223	9.45276e-25	Malignant	UPK3A
CHMP2B	4.56129e-29	0.290013	0.543	0.357	9.64529e-25	Malignant	CHMP2B
ANXA4	4.86883e-29	0.374897	0.559	0.372	1.02956e-24	Malignant	ANXA4
CYB5R1	4.95404e-29	0.314104	0.493	0.312	1.04758e-24	Malignant	CYB5R1
RASSF7	4.96728e-29	0.253237	0.39	0.218	1.05038e-24	Malignant	RASSF7
PCP4L1	5.98985e-29	0.272739	0.359	0.188	1.26661e-24	Malignant	PCP4L1
RNF39	6.11568e-29	0.529429	0.309	0.156	1.29322e-24	Malignant	RNF39
LITAF	8.03346e-29	-0.575105	0.645	0.671	1.69876e-24	Malignant	LITAF
HES4	1.21849e-28	0.351104	0.716	0.533	2.57663e-24	Malignant	HES4
ZCRB1	1.45902e-28	0.277179	0.663	0.475	3.08524e-24	Malignant	ZCRB1
HSP90AA1	1.76264e-28	-0.49885	0.985	0.985	3.72727e-24	Malignant	HSP90AA1
ARPC3	1.81841e-28	-0.338071	0.918	0.913	3.84521e-24	Malignant	ARPC3
SEC61B	1.9887e-28	-0.399912	0.739	0.761	4.2053e-24	Malignant	SEC61B
HSPA6	2.12331e-28	-0.899571	0.193	0.307	4.48995e-24	Malignant	HSPA6
BTG1	2.13736e-28	-0.395446	0.83	0.889	4.51967e-24	Malignant	BTG1
COX7B	2.15671e-28	0.276377	0.955	0.863	4.56058e-24	Malignant	COX7B
ERGIC3	2.70503e-28	0.275633	0.823	0.66	5.72006e-24	Malignant	ERGIC3
FDPS	2.93628e-28	0.522219	0.584	0.408	6.20906e-24	Malignant	FDPS
CD55	3.24148e-28	0.380286	0.539	0.362	6.85444e-24	Malignant	CD55
SMIM5	4.19732e-28	0.306562	0.309	0.154	8.87565e-24	Malignant	SMIM5
TMA7	4.41238e-28	0.270093	0.986	0.922	9.33041e-24	Malignant	TMA7
ALDOA	4.43612e-28	0.365982	0.964	0.935	9.38062e-24	Malignant	ALDOA
SPAG4	4.72333e-28	0.287936	0.251	0.109	9.98796e-24	Malignant	SPAG4
SPAG16	6.85991e-28	0.250929	0.405	0.232	1.4506e-23	Malignant	SPAG16
RPL34	8.22626e-28	0.286546	1	1	1.73953e-23	Malignant	RPL34
HSPA8	8.49243e-28	-0.378852	0.851	0.872	1.79581e-23	Malignant	HSPA8
COX6C	1.00342e-27	0.323363	0.978	0.939	2.12183e-23	Malignant	COX6C
POLR1D	1.05514e-27	0.280313	0.761	0.582	2.23119e-23	Malignant	POLR1D
POLR2J	1.16614e-27	0.306262	0.755	0.581	2.46591e-23	Malignant	POLR2J
RPL15	1.36542e-27	0.260078	1	1	2.88732e-23	Malignant	RPL15
CXCL16	1.46899e-27	-0.562236	0.223	0.323	3.10633e-23	Malignant	CXCL16
ABRACL	1.48349e-27	0.261822	0.726	0.54	3.137e-23	Malignant	ABRACL
HSBP1	1.57298e-27	0.261417	0.89	0.747	3.32622e-23	Malignant	HSBP1
HMGA1	1.64066e-27	0.334503	0.611	0.43	3.46934e-23	Malignant	HMGA1
CD44	1.86207e-27	-0.48882	0.354	0.465	3.93753e-23	Malignant	CD44
ZNRD1	2.45215e-27	0.261516	0.514	0.33	5.18531e-23	Malignant	ZNRD1
BMP2	2.8878e-27	0.463494	0.346	0.193	6.10655e-23	Malignant	BMP2
BCAM	3.80286e-27	0.349599	0.434	0.263	8.04152e-23	Malignant	BCAM
TMEM141	4.53803e-27	0.335559	0.522	0.342	9.59611e-23	Malignant	TMEM141
CYP3A5	6.52039e-27	0.309737	0.296	0.145	1.3788e-22	Malignant	CYP3A5
ATP6V0E1	8.76125e-27	-0.277008	0.899	0.894	1.85265e-22	Malignant	ATP6V0E1
GALE	1.04374e-26	0.257217	0.352	0.19	2.2071e-22	Malignant	GALE
FAM3C	1.21085e-26	0.271691	0.522	0.329	2.56047e-22	Malignant	FAM3C
ABHD11	1.98551e-26	0.310907	0.379	0.215	4.19855e-22	Malignant	ABHD11
ACOX1	2.02366e-26	0.277462	0.392	0.225	4.27922e-22	Malignant	ACOX1
SQLE	2.39332e-26	0.290854	0.379	0.213	5.06091e-22	Malignant	SQLE
FO538757.2	3.05276e-26	0.32967	0.378	0.226	6.45536e-22	Malignant	FO538757.2
RPL7	3.5963e-26	0.427885	0.999	0.999	7.60474e-22	Malignant	RPL7
EGLN3	4.87434e-26	0.308793	0.274	0.131	1.03073e-21	Malignant	EGLN3
DPY30	7.81675e-26	0.267369	0.671	0.495	1.65293e-21	Malignant	DPY30
CFLAR	8.4365e-26	-0.494831	0.304	0.4	1.78398e-21	Malignant	CFLAR
ERO1A	8.70973e-26	0.355244	0.383	0.223	1.84176e-21	Malignant	ERO1A
MYL6	1.03537e-25	-0.40481	0.987	0.986	2.18939e-21	Malignant	MYL6
SOX4	1.05402e-25	0.299017	0.78	0.581	2.22883e-21	Malignant	SOX4
MMP28	1.09971e-25	0.264766	0.252	0.116	2.32545e-21	Malignant	MMP28
MMP24-AS1	1.48795e-25	0.309628	0.564	0.401	3.14642e-21	Malignant	MMP24-AS1
PIM1	1.74192e-25	0.388381	0.469	0.306	3.68346e-21	Malignant	PIM1
CTSA	1.79881e-25	-0.46464	0.391	0.483	3.80376e-21	Malignant	CTSA
PEA15	1.98075e-25	-0.458328	0.271	0.368	4.1885e-21	Malignant	PEA15
TPM4	3.17623e-25	-0.655985	0.606	0.624	6.71646e-21	Malignant	TPM4
TSPAN8	3.20096e-25	0.348161	0.295	0.147	6.76875e-21	Malignant	TSPAN8
VOPP1	3.37829e-25	-0.360093	0.168	0.264	7.14373e-21	Malignant	VOPP1
YWHAZ	7.31583e-25	0.453152	0.879	0.767	1.54701e-20	Malignant	YWHAZ
UBC	8.35515e-25	-0.257647	0.956	0.963	1.76678e-20	Malignant	UBC
ILK	9.85899e-25	-0.512477	0.261	0.355	2.08478e-20	Malignant	ILK
HSP90B1	1.15742e-24	-0.389958	0.706	0.729	2.44747e-20	Malignant	HSP90B1
HMGCS1	1.76109e-24	0.35783	0.375	0.223	3.724e-20	Malignant	HMGCS1
ATP1B1	3.19865e-24	0.284862	0.558	0.381	6.76386e-20	Malignant	ATP1B1
SNRPF	4.19964e-24	0.278417	0.826	0.669	8.88056e-20	Malignant	SNRPF
MRPS26	4.21759e-24	0.251717	0.567	0.39	8.91852e-20	Malignant	MRPS26
CISD3	4.36814e-24	0.317654	0.601	0.452	9.23688e-20	Malignant	CISD3
RPS27L	4.98508e-24	-0.372983	0.855	0.862	1.05415e-19	Malignant	RPS27L
TMEM147	6.77183e-24	0.330896	0.775	0.637	1.43197e-19	Malignant	TMEM147
ITGA3	6.79296e-24	0.30108	0.376	0.226	1.43644e-19	Malignant	ITGA3
SLC20A1	7.92135e-24	0.388062	0.555	0.4	1.67505e-19	Malignant	SLC20A1
C3orf14	8.94196e-24	0.261607	0.331	0.185	1.89087e-19	Malignant	C3orf14
TMEM50B	1.39532e-23	0.27176	0.57	0.392	2.95054e-19	Malignant	TMEM50B
RPL4	1.83499e-23	0.258623	0.984	0.976	3.88028e-19	Malignant	RPL4
C17orf89	3.16507e-23	0.280416	0.666	0.503	6.69286e-19	Malignant	C17orf89
DSP	3.72226e-23	0.252036	0.309	0.165	7.87108e-19	Malignant	DSP
HOTAIRM1	6.73421e-23	0.272246	0.424	0.267	1.42402e-18	Malignant	HOTAIRM1
HERPUD1	6.74095e-23	-0.678051	0.69	0.735	1.42544e-18	Malignant	HERPUD1
GDF15	1.04299e-22	0.929715	0.65	0.598	2.2055e-18	Malignant	GDF15
PPP1R14B	1.10799e-22	0.295348	0.566	0.407	2.34297e-18	Malignant	PPP1R14B
RPL6	1.13164e-22	0.323446	0.997	0.995	2.39296e-18	Malignant	RPL6
RND3	1.45327e-22	0.257759	0.46	0.294	3.07307e-18	Malignant	RND3
CCDC85B	1.47472e-22	-0.628094	0.39	0.467	3.11844e-18	Malignant	CCDC85B
LDHB	1.62539e-22	0.324794	0.835	0.753	3.43705e-18	Malignant	LDHB
SOCS3	2.64164e-22	-0.678207	0.371	0.461	5.58601e-18	Malignant	SOCS3
AKAP13	3.43039e-22	-0.38951	0.25	0.343	7.25391e-18	Malignant	AKAP13
OAZ1	3.47292e-22	-0.272587	0.981	0.98	7.34384e-18	Malignant	OAZ1
DPM3	5.12439e-22	0.257976	0.524	0.361	1.0836e-17	Malignant	DPM3
DKK1	5.58837e-22	0.395178	0.251	0.125	1.18172e-17	Malignant	DKK1
RPL36A	6.70165e-22	0.359955	0.916	0.888	1.41713e-17	Malignant	RPL36A
ZC3H12A	7.62716e-22	0.371964	0.459	0.312	1.61284e-17	Malignant	ZC3H12A
TIMM13	1.22085e-21	0.257586	0.803	0.65	2.58162e-17	Malignant	TIMM13
EIF6	2.00388e-21	0.251209	0.787	0.628	4.23741e-17	Malignant	EIF6
ARPC4	2.82874e-21	-0.338114	0.51	0.577	5.98165e-17	Malignant	ARPC4
IDI1	2.91604e-21	0.474875	0.497	0.358	6.16627e-17	Malignant	IDI1
STRA13	4.87161e-21	0.361284	0.609	0.455	1.03015e-16	Malignant	STRA13
SQSTM1	5.07853e-21	0.40208	0.815	0.697	1.07391e-16	Malignant	SQSTM1
CLIC1	6.96511e-21	-0.275011	0.916	0.904	1.47284e-16	Malignant	CLIC1
TGFB1	7.08739e-21	-0.316258	0.173	0.262	1.4987e-16	Malignant	TGFB1
CAST	7.12791e-21	0.254342	0.713	0.553	1.50727e-16	Malignant	CAST
SOD2	1.089e-20	-1.03068	0.49	0.541	2.3028e-16	Malignant	SOD2
MUC1	1.19774e-20	0.26464	0.266	0.137	2.53275e-16	Malignant	MUC1
UPK1A	1.43677e-20	0.45694	0.32	0.197	3.0382e-16	Malignant	UPK1A
SRSF9	1.5168e-20	0.259703	0.738	0.596	3.20743e-16	Malignant	SRSF9
CXCL8	1.73387e-20	-0.999094	0.395	0.491	3.66645e-16	Malignant	CXCL8
MCL1	1.8878e-20	-0.404773	0.687	0.705	3.99195e-16	Malignant	MCL1
PTMS	1.93156e-20	-0.43788	0.55	0.598	4.08447e-16	Malignant	PTMS
NDRG1	2.3459e-20	0.445628	0.394	0.256	4.96064e-16	Malignant	NDRG1
NBEAL1	2.72225e-20	0.346952	0.654	0.524	5.75647e-16	Malignant	NBEAL1
GRB2	4.23279e-20	-0.398607	0.265	0.343	8.95066e-16	Malignant	GRB2
ZFAND5	8.5259e-20	-0.624105	0.562	0.595	1.80289e-15	Malignant	ZFAND5
MIR4458HG	1.57488e-19	0.270376	0.36	0.223	3.33023e-15	Malignant	MIR4458HG
ATP1B3	1.81829e-19	-0.423248	0.565	0.604	3.84496e-15	Malignant	ATP1B3
MBNL1	1.94738e-19	-0.345548	0.214	0.3	4.11793e-15	Malignant	MBNL1
POLR2K	2.99974e-19	0.32234	0.739	0.599	6.34324e-15	Malignant	POLR2K
HIST1H1C	3.11818e-19	0.382556	0.298	0.175	6.59371e-15	Malignant	HIST1H1C
PTN	3.32667e-19	0.717374	0.271	0.156	7.03458e-15	Malignant	PTN
HSPB1	3.33905e-19	0.312049	0.999	0.984	7.06075e-15	Malignant	HSPB1
ITM2B	6.00467e-19	-0.314344	0.978	0.97	1.26975e-14	Malignant	ITM2B
NAP1L1	6.21801e-19	-0.312082	0.75	0.748	1.31486e-14	Malignant	NAP1L1
GLO1	9.67456e-19	0.289128	0.52	0.372	2.04578e-14	Malignant	GLO1
SNHG25	1.09893e-18	0.299437	0.447	0.299	2.32379e-14	Malignant	SNHG25
DNAJA1	1.1477e-18	-0.453624	0.669	0.693	2.42694e-14	Malignant	DNAJA1
TGIF1	1.75625e-18	0.250561	0.657	0.503	3.71376e-14	Malignant	TGIF1
MYH9	1.87733e-18	-0.470636	0.346	0.412	3.9698e-14	Malignant	MYH9
FABP4	2.21731e-18	0.511644	0.343	0.218	4.68872e-14	Malignant	FABP4
ST3GAL4	2.64418e-18	0.250105	0.379	0.247	5.59138e-14	Malignant	ST3GAL4
CNPY3	2.97183e-18	-0.41839	0.327	0.401	6.28423e-14	Malignant	CNPY3
HEXB	3.88315e-18	-0.390333	0.37	0.438	8.21131e-14	Malignant	HEXB
UPK3B	5.73621e-18	0.28943	0.275	0.158	1.21298e-13	Malignant	UPK3B
NINJ1	7.47809e-18	-0.509509	0.322	0.388	1.58132e-13	Malignant	NINJ1
TACC1	9.56648e-18	-0.325295	0.269	0.349	2.02293e-13	Malignant	TACC1
DRAP1	1.02616e-17	-0.29765	0.713	0.723	2.16991e-13	Malignant	DRAP1
ALDH2	1.04795e-17	-0.41434	0.21	0.29	2.216e-13	Malignant	ALDH2
COX14	1.14541e-17	0.310697	0.785	0.653	2.42209e-13	Malignant	COX14
SERPINH1	1.78173e-17	-0.890973	0.335	0.395	3.76765e-13	Malignant	SERPINH1
CDK4	1.93555e-17	0.294617	0.589	0.436	4.09292e-13	Malignant	CDK4
SERPINB1	2.78386e-17	-0.362365	0.288	0.367	5.88675e-13	Malignant	SERPINB1
PHLDA1	3.09827e-17	-0.549366	0.321	0.403	6.5516e-13	Malignant	PHLDA1
TPM3	3.63135e-17	-0.329135	0.636	0.658	7.67885e-13	Malignant	TPM3
RSU1	3.92073e-17	-0.349199	0.249	0.325	8.29077e-13	Malignant	RSU1
RDX	4.15731e-17	0.286818	0.496	0.364	8.79105e-13	Malignant	RDX
ACTR3	5.30158e-17	-0.37041	0.57	0.598	1.12107e-12	Malignant	ACTR3
ARL14	6.69981e-17	0.485503	0.274	0.164	1.41674e-12	Malignant	ARL14
SLC16A3	1.64548e-16	-0.426451	0.377	0.449	3.47953e-12	Malignant	SLC16A3
RAB32	1.90369e-16	-0.355804	0.262	0.338	4.02555e-12	Malignant	RAB32
CALM3	2.03479e-16	-0.374403	0.532	0.574	4.30278e-12	Malignant	CALM3
IFI27	2.4798e-16	0.595346	0.848	0.803	5.24379e-12	Malignant	IFI27
UBB	2.83026e-16	-0.296934	0.972	0.965	5.98486e-12	Malignant	UBB
RBPJ	4.13925e-16	-0.341092	0.281	0.354	8.75285e-12	Malignant	RBPJ
CLTA	4.35123e-16	-0.272633	0.712	0.717	9.20112e-12	Malignant	CLTA
CXCL17	5.81898e-16	0.313636	0.315	0.196	1.23048e-11	Malignant	CXCL17
RPL17	7.38516e-16	0.260437	0.717	0.598	1.56167e-11	Malignant	RPL17
VMP1	8.6328e-16	0.284395	0.755	0.619	1.82549e-11	Malignant	VMP1
ODC1	1.61061e-15	0.305179	0.306	0.197	3.40579e-11	Malignant	ODC1
HIGD1A	1.72684e-15	0.264208	0.54	0.407	3.65158e-11	Malignant	HIGD1A
HEXA	2.28423e-15	-0.360297	0.256	0.326	4.83022e-11	Malignant	HEXA
CYSTM1	2.30036e-15	0.323473	0.653	0.529	4.86433e-11	Malignant	CYSTM1
ATP6V0D1	2.76014e-15	-0.348009	0.363	0.42	5.8366e-11	Malignant	ATP6V0D1
S100A10	2.89106e-15	-0.299494	0.738	0.807	6.11344e-11	Malignant	S100A10
IFNGR1	3.56186e-15	-0.436413	0.38	0.438	7.53192e-11	Malignant	IFNGR1
ERP44	4.01737e-15	-0.345179	0.271	0.336	8.49513e-11	Malignant	ERP44
PSME2	4.68882e-15	-0.358503	0.713	0.723	9.91499e-11	Malignant	PSME2
TRIB1	9.55774e-15	0.265514	0.484	0.352	2.02108e-10	Malignant	TRIB1
CTSD	1.02079e-14	-0.713627	0.857	0.832	2.15855e-10	Malignant	CTSD
HSPH1	1.03232e-14	-0.513069	0.522	0.551	2.18295e-10	Malignant	HSPH1
SERPING1	1.16538e-14	-0.674879	0.239	0.301	2.46432e-10	Malignant	SERPING1
DBI	1.20671e-14	0.260747	0.947	0.896	2.55171e-10	Malignant	DBI
HNMT	2.65556e-14	0.257741	0.631	0.493	5.61545e-10	Malignant	HNMT
NCOA7	3.46909e-14	0.27141	0.397	0.279	7.33573e-10	Malignant	NCOA7
PLD3	3.88391e-14	-0.4693	0.376	0.422	8.21291e-10	Malignant	PLD3
B3GAT3	5.08065e-14	-0.26654	0.18	0.251	1.07435e-09	Malignant	B3GAT3
PLAU	7.98975e-14	-0.382766	0.232	0.31	1.68951e-09	Malignant	PLAU
NFKB1	8.94285e-14	-0.414456	0.197	0.262	1.89105e-09	Malignant	NFKB1
SCAMP2	9.82025e-14	-0.297953	0.203	0.27	2.07659e-09	Malignant	SCAMP2
STK4	1.07799e-13	-0.332871	0.242	0.311	2.27951e-09	Malignant	STK4
LEAP2	1.82787e-13	0.629683	0.255	0.164	3.86521e-09	Malignant	LEAP2
NFKBIZ	2.14084e-13	-0.405728	0.278	0.343	4.52702e-09	Malignant	NFKBIZ
COPE	2.61362e-13	-0.267394	0.718	0.718	5.52677e-09	Malignant	COPE
2024-09-07	3.13191e-13	-0.388916	0.583	0.597	6.62274e-09	Malignant	2024-09-07
DPP7	3.31382e-13	-0.324672	0.429	0.473	7.00741e-09	Malignant	DPP7
BPGM	6.37689e-13	0.342984	0.34	0.234	1.34846e-08	Malignant	BPGM
VKORC1	7.46224e-13	-0.387641	0.468	0.49	1.57797e-08	Malignant	VKORC1
SPCS1	1.08063e-12	0.265375	0.873	0.782	2.28509e-08	Malignant	SPCS1
LDHA	1.10636e-12	-0.254502	0.739	0.764	2.3395e-08	Malignant	LDHA
RCN1	2.9065e-12	0.275185	0.515	0.383	6.14609e-08	Malignant	RCN1
SEPP1	3.26624e-12	-0.298295	0.504	0.36	6.90679e-08	Malignant	SEPP1
MMP14	3.50636e-12	-0.352947	0.21	0.272	7.41455e-08	Malignant	MMP14
PDIA3	4.91511e-12	-0.265938	0.688	0.671	1.03935e-07	Malignant	PDIA3
FOS	4.99093e-12	-0.253455	0.872	0.908	1.05538e-07	Malignant	FOS
FTL	6.79086e-12	-0.41786	1	1	1.436e-07	Malignant	FTL
MDM2	8.63966e-12	0.371466	0.432	0.325	1.82694e-07	Malignant	MDM2
TRA2B	9.60041e-12	-0.308817	0.578	0.604	2.0301e-07	Malignant	TRA2B
WDR1	1.08812e-11	-0.341199	0.428	0.458	2.30094e-07	Malignant	WDR1
PHPT1	1.9258e-11	-0.321917	0.545	0.562	4.0723e-07	Malignant	PHPT1
KLF4	3.29186e-11	-0.521494	0.367	0.42	6.96097e-07	Malignant	KLF4
RNASET2	4.59005e-11	-0.582573	0.626	0.601	9.70612e-07	Malignant	RNASET2
SCD	4.7615e-11	0.259355	0.27	0.182	1.00687e-06	Malignant	SCD
DDX24	7.00067e-11	-0.289149	0.41	0.451	1.48036e-06	Malignant	DDX24
LAP3	7.67664e-11	-0.369504	0.232	0.284	1.6233e-06	Malignant	LAP3
IGFBP7	1.1087e-10	-3.40539	0.39	0.4	2.34446e-06	Malignant	IGFBP7
HMGB2	1.22717e-10	-0.472925	0.392	0.438	2.59497e-06	Malignant	HMGB2
PPIB	1.29978e-10	-0.276318	0.849	0.826	2.74852e-06	Malignant	PPIB
CD81	1.55527e-10	-0.396745	0.387	0.427	3.28878e-06	Malignant	CD81
TWF2	2.2186e-10	-0.291498	0.283	0.334	4.69145e-06	Malignant	TWF2
CSRP1	2.57096e-10	-0.505551	0.238	0.289	5.43655e-06	Malignant	CSRP1
PPP1CB	3.81475e-10	0.251578	0.658	0.53	8.06668e-06	Malignant	PPP1CB
IFI16	5.24923e-10	-0.295091	0.412	0.454	1.11e-05	Malignant	IFI16
DCTN3	5.99181e-10	-0.268198	0.376	0.414	1.26703e-05	Malignant	DCTN3
NUCB1	1.08897e-09	-0.310747	0.381	0.415	2.30274e-05	Malignant	NUCB1
PLSCR1	1.23802e-09	-0.295993	0.435	0.467	2.61792e-05	Malignant	PLSCR1
TMED9	1.51409e-09	-0.250094	0.667	0.662	3.20169e-05	Malignant	TMED9
OAZ2	1.83169e-09	-0.395843	0.401	0.428	3.87329e-05	Malignant	OAZ2
GNAQ	2.9271e-09	-0.257733	0.207	0.259	6.18964e-05	Malignant	GNAQ
CYB5R3	5.0333e-09	-0.435374	0.406	0.427	0.000106434	Malignant	CYB5R3
FLOT1	1.25543e-08	-0.295339	0.415	0.443	0.000265473	Malignant	FLOT1
FAM195B	1.51281e-08	-0.274473	0.328	0.366	0.000319899	Malignant	FAM195B
KLF6	1.51527e-08	-0.270732	0.876	0.874	0.000320419	Malignant	KLF6
PICALM	1.56165e-08	-0.259773	0.208	0.254	0.000330226	Malignant	PICALM
DHRS7	3.38822e-08	-0.271124	0.393	0.422	0.000716474	Malignant	DHRS7
JMJD1C	6.88326e-08	-0.280001	0.239	0.281	0.00145553	Malignant	JMJD1C
ARL2	7.68975e-08	-0.253455	0.379	0.419	0.00162607	Malignant	ARL2
MGST3	8.83817e-08	-0.250767	0.72	0.694	0.00186892	Malignant	MGST3
HSPA5	9.45254e-08	-0.318715	0.55	0.55	0.00199883	Malignant	HSPA5
JAK1	1.04222e-07	-0.27295	0.36	0.388	0.00220389	Malignant	JAK1
LAMP2	1.08169e-07	-0.285362	0.296	0.333	0.00228733	Malignant	LAMP2
NAGK	1.79839e-07	-0.250775	0.314	0.354	0.00380287	Malignant	NAGK
AREG	1.81353e-07	-0.705072	0.339	0.388	0.00383489	Malignant	AREG
DBNL	1.88572e-07	-0.262488	0.321	0.354	0.00398753	Malignant	DBNL
ARL5A	2.0458e-07	-0.263169	0.5	0.512	0.00432606	Malignant	ARL5A
NAMPT	2.29601e-07	-0.401779	0.55	0.537	0.00485513	Malignant	NAMPT
SERPINB6	7.44705e-07	-0.309644	0.395	0.417	0.0157475	Malignant	SERPINB6
LCN2	8.28944e-07	0.582868	0.254	0.188	0.0175288	Malignant	LCN2
LGMN	8.32924e-07	-0.46483	0.344	0.362	0.017613	Malignant	LGMN
RABAC1	1.19477e-06	-0.253255	0.688	0.667	0.0252645	Malignant	RABAC1
HIF1A	2.34031e-06	-0.266979	0.396	0.42	0.0494882	Malignant	HIF1A
ITGB1	2.38747e-06	-0.329239	0.638	0.602	0.0504854	Malignant	ITGB1
IFNGR2	3.02424e-06	-0.260309	0.446	0.457	0.0639507	Malignant	IFNGR2
LY6E	4.01761e-06	-0.269301	0.758	0.744	0.0849564	Malignant	LY6E
DUSP2	4.72544e-06	0.273776	0.631	0.573	0.0999241	Malignant	DUSP2
LGALS9	1.18189e-05	-0.270414	0.326	0.352	0.249922	Malignant	LGALS9
BAG3	2.25091e-05	-0.50482	0.292	0.318	0.475978	Malignant	BAG3
CALU	4.08989e-05	-0.395231	0.316	0.33	0.864848	Malignant	CALU
CSRNP1	0.000124821	-0.253502	0.289	0.311	1	Malignant	CSRNP1
ISG15	0.00016201	-0.496929	0.74	0.73	1	Malignant	ISG15
UBE2L6	0.000181766	-0.282617	0.404	0.41	1	Malignant	UBE2L6
TPM1	0.000436778	-1.06599	0.396	0.375	1	Malignant	TPM1
GLUL	0.000521515	-0.392576	0.752	0.708	1	Malignant	GLUL
TWISTNB	0.000553299	-0.34621	0.251	0.275	1	Malignant	TWISTNB
IER5	0.000653345	-0.261254	0.361	0.381	1	Malignant	IER5
LIPA	0.000670065	-0.256409	0.25	0.27	1	Malignant	LIPA
ARID5B	0.00174241	-0.313689	0.312	0.322	1	Malignant	ARID5B
DDIT4	0.00874378	0.252705	0.665	0.604	1	Malignant	DDIT4
CCL3.1	0	4.58366	0.518	0.047	0	Mono.Macr	CCL3
C1QB.1	0	4.54889	0.698	0.036	0	Mono.Macr	C1QB
HLA-DRA.1	0	4.50978	0.919	0.483	0	Mono.Macr	HLA-DRA
CCL3L3.1	0	4.37735	0.479	0.034	0	Mono.Macr	CCL3L3
HLA-DPB1.1	0	4.35052	0.845	0.29	0	Mono.Macr	HLA-DPB1
C1QA.1	0	4.34164	0.695	0.034	0	Mono.Macr	C1QA
CCL4L2.1	0	4.28071	0.483	0.05	0	Mono.Macr	CCL4L2
TYROBP.1	0	4.2787	0.847	0.052	0	Mono.Macr	TYROBP
C1QC.1	0	4.03619	0.658	0.022	0	Mono.Macr	C1QC
CCL4.1	0	3.99413	0.47	0.05	0	Mono.Macr	CCL4
RGS1.1	0	3.9353	0.721	0.045	0	Mono.Macr	RGS1
SRGN.1	0	3.65232	0.77	0.182	0	Mono.Macr	SRGN
HLA-DRB1.1	0	3.63802	0.887	0.423	0	Mono.Macr	HLA-DRB1
FCER1G.1	0	3.51388	0.766	0.035	0	Mono.Macr	FCER1G
AIF1.1	0	3.33136	0.77	0.031	0	Mono.Macr	AIF1
ALOX5AP.1	0	3.27983	0.709	0.026	0	Mono.Macr	ALOX5AP
HLA-DQB1.1	0	3.26688	0.746	0.181	0	Mono.Macr	HLA-DQB1
HLA-DQA1.1	0	3.19923	0.709	0.068	0	Mono.Macr	HLA-DQA1
IL1B.1	0	3.14363	0.459	0.071	0	Mono.Macr	IL1B
VIM.1	0	3.0208	0.691	0.043	0	Mono.Macr	VIM
GPR183.1	0	3.01542	0.535	0.015	0	Mono.Macr	GPR183
LYZ.1	0	2.9124	0.598	0.056	0	Mono.Macr	LYZ
LAPTM5.1	0	2.87863	0.739	0.069	0	Mono.Macr	LAPTM5
MS4A6A.1	0	2.70057	0.65	0.012	0	Mono.Macr	MS4A6A
CD14.1	0	2.53318	0.521	0.011	0	Mono.Macr	CD14
RGS2.1	0	2.45246	0.508	0.053	0	Mono.Macr	RGS2
LST1.1	0	2.41655	0.637	0.015	0	Mono.Macr	LST1
TREM2.1	0	2.10079	0.456	0.005	0	Mono.Macr	TREM2
CD83.1	0	2.07045	0.456	0.075	0	Mono.Macr	CD83
CXCR4.1	0	2.05334	0.492	0.03	0	Mono.Macr	CXCR4
MS4A7.1	0	1.95563	0.538	0.016	0	Mono.Macr	MS4A7
RGS10.1	0	1.91344	0.65	0.129	0	Mono.Macr	RGS10
HLA-DMB.1	0	1.89464	0.565	0.088	0	Mono.Macr	HLA-DMB
FCGR3A	0	1.89399	0.392	0.007	0	Mono.Macr	FCGR3A
FCGR2A.1	0	1.88646	0.503	0.01	0	Mono.Macr	FCGR2A
BCL2A1	0	1.80676	0.338	0.008	0	Mono.Macr	BCL2A1
CORO1A.1	0	1.78422	0.539	0.038	0	Mono.Macr	CORO1A
RNASE6.1	0	1.78098	0.488	0.009	0	Mono.Macr	RNASE6
ITGB2.1	0	1.71748	0.506	0.007	0	Mono.Macr	ITGB2
EMP3.1	0	1.70979	0.512	0.042	0	Mono.Macr	EMP3
SPI1.1	0	1.61222	0.494	0.006	0	Mono.Macr	SPI1
TMEM176B.1	0	1.56719	0.422	0.027	0	Mono.Macr	TMEM176B
C1orf162.1	0	1.49883	0.459	0.007	0	Mono.Macr	C1orf162
FAM26F.1	0	1.463	0.42	0.041	0	Mono.Macr	FAM26F
CD37.1	0	1.44592	0.477	0.014	0	Mono.Macr	CD37
MNDA	0	1.44141	0.42	0.004	0	Mono.Macr	MNDA
LY86.1	0	1.43157	0.456	0.004	0	Mono.Macr	LY86
OLR1	0	1.42473	0.396	0.009	0	Mono.Macr	OLR1
TGFBI.1	0	1.41794	0.45	0.058	0	Mono.Macr	TGFBI
IGSF6.1	0	1.35168	0.432	0.006	0	Mono.Macr	IGSF6
HCST.1	0	1.34287	0.41	0.038	0	Mono.Macr	HCST
PLEK	0	1.33574	0.407	0.003	0	Mono.Macr	PLEK
MS4A4A	0	1.30247	0.357	0.004	0	Mono.Macr	MS4A4A
CSF1R	0	1.29332	0.42	0.003	0	Mono.Macr	CSF1R
CD53.1	0	1.29288	0.428	0.008	0	Mono.Macr	CD53
FGL2	0	1.22729	0.357	0.014	0	Mono.Macr	FGL2
SAMSN1.1	0	1.22304	0.362	0.008	0	Mono.Macr	SAMSN1
VSIG4	0	1.21031	0.311	0.002	0	Mono.Macr	VSIG4
GPR34	0	1.19909	0.351	0.003	0	Mono.Macr	GPR34
TNFSF13B	0	1.13255	0.365	0.017	0	Mono.Macr	TNFSF13B
FYB.1	0	1.1228	0.365	0.011	0	Mono.Macr	FYB
MEF2C.1	0	1.07763	0.374	0.026	0	Mono.Macr	MEF2C
GLIPR1.1	0	1.06702	0.399	0.056	0	Mono.Macr	GLIPR1
CYBB	0	1.06631	0.365	0.007	0	Mono.Macr	CYBB
PTPRC.1	0	1.05303	0.371	0.011	0	Mono.Macr	PTPRC
MSR1	0	1.03985	0.314	0.013	0	Mono.Macr	MSR1
LILRB4	0	1.03108	0.323	0.001	0	Mono.Macr	LILRB4
C5AR1	0	0.999663	0.269	0.004	0	Mono.Macr	C5AR1
EVI2B	0	0.995855	0.329	0.006	0	Mono.Macr	EVI2B
OLFML3	0	0.981204	0.254	0.006	0	Mono.Macr	OLFML3
CPVL	0	0.977241	0.29	0.017	0	Mono.Macr	CPVL
PHACTR1	0	0.970061	0.27	0.008	0	Mono.Macr	PHACTR1
A2M.1	0	0.965341	0.281	0.01	0	Mono.Macr	A2M
CD86	0	0.964319	0.345	0.006	0	Mono.Macr	CD86
C1orf54	0	0.938301	0.303	0.026	0	Mono.Macr	C1orf54
TMEM176A.1	0	0.931472	0.3	0.023	0	Mono.Macr	TMEM176A
IFI30	0	0.92989	0.267	0.012	0	Mono.Macr	IFI30
HCLS1.1	0	0.919767	0.381	0.042	0	Mono.Macr	HCLS1
LAIR1	0	0.892808	0.317	0.017	0	Mono.Macr	LAIR1
ABI3	0	0.889637	0.315	0.006	0	Mono.Macr	ABI3
ADAP2	0	0.882555	0.318	0.008	0	Mono.Macr	ADAP2
LAT2	0	0.862744	0.296	0.003	0	Mono.Macr	LAT2
CLEC7A	0	0.856776	0.338	0.04	0	Mono.Macr	CLEC7A
LCP2	0	0.85183	0.287	0.006	0	Mono.Macr	LCP2
OGFRL1	0	0.811316	0.3	0.022	0	Mono.Macr	OGFRL1
C3AR1	0	0.799777	0.264	0.001	0	Mono.Macr	C3AR1
GYPC.1	0	0.797813	0.263	0.012	0	Mono.Macr	GYPC
RASSF4	0	0.79731	0.29	0.021	0	Mono.Macr	RASSF4
CD300A	0	0.756755	0.251	0.01	0	Mono.Macr	CD300A
CELF2	0	0.747293	0.275	0.007	0	Mono.Macr	CELF2
IRF8	0	0.743238	0.251	0.005	0	Mono.Macr	IRF8
HCK	0	0.741112	0.285	0.002	0	Mono.Macr	HCK
SERPINB9	0	0.740623	0.261	0.023	0	Mono.Macr	SERPINB9
EVI2A	0	0.739357	0.257	0.005	0	Mono.Macr	EVI2A
HAVCR2	0	0.710105	0.266	0.003	0	Mono.Macr	HAVCR2
CSF2RA	0	0.69592	0.263	0.015	0	Mono.Macr	CSF2RA
ZEB2	0	0.651128	0.255	0.015	0	Mono.Macr	ZEB2
HLA-DPA1.1	1.01324e-307	4.27791	0.812	0.326	2.14261e-303	Mono.Macr	HLA-DPA1
SPP1.1	3.89503e-294	4.84447	0.435	0.073	8.23642e-290	Mono.Macr	SPP1
APOE.1	3.59482e-283	4.84667	0.611	0.16	7.60161e-279	Mono.Macr	APOE
AXL.1	2.72146e-275	1.01598	0.348	0.047	5.75479e-271	Mono.Macr	AXL
SERPINF1.1	4.11505e-264	0.861015	0.308	0.038	8.70169e-260	Mono.Macr	SERPINF1
LY96.1	1.7668e-258	1.14199	0.444	0.082	3.73608e-254	Mono.Macr	LY96
RNF130.1	8.87291e-245	1.16596	0.435	0.085	1.87627e-240	Mono.Macr	RNF130
SERPINA1.1	2.29633e-244	1.08303	0.426	0.076	4.85583e-240	Mono.Macr	SERPINA1
CD74.1	7.18092e-234	3.59948	0.958	0.784	1.51848e-229	Mono.Macr	CD74
KCTD12	7.43925e-233	0.763097	0.32	0.047	1.5731e-228	Mono.Macr	KCTD12
SAMHD1	8.41702e-233	0.70603	0.291	0.039	1.77986e-228	Mono.Macr	SAMHD1
LSP1.1	1.85478e-221	1.3671	0.438	0.092	3.92213e-217	Mono.Macr	LSP1
ARRB2	3.97725e-220	0.857297	0.335	0.054	8.4103e-216	Mono.Macr	ARRB2
CD68.1	1.93438e-213	2.06469	0.637	0.234	4.09043e-209	Mono.Macr	CD68
MSN.1	7.15614e-209	0.786055	0.327	0.053	1.51324e-204	Mono.Macr	MSN
AP1S2.1	2.09387e-193	1.02486	0.393	0.084	4.42771e-189	Mono.Macr	AP1S2
HLA-DMA.1	5.20876e-189	2.10765	0.734	0.368	1.10144e-184	Mono.Macr	HLA-DMA
ACTB.1	1.22652e-183	1.34914	1	0.999	2.5936e-179	Mono.Macr	ACTB
COTL1.1	1.55974e-176	2.00261	0.676	0.308	3.29823e-172	Mono.Macr	COTL1
LGALS1.1	3.59347e-173	2.20555	0.869	0.52	7.59875e-169	Mono.Macr	LGALS1
CAMK1	3.49262e-170	0.748642	0.266	0.043	7.38549e-166	Mono.Macr	CAMK1
ICAM1	1.09069e-164	0.899455	0.306	0.057	2.30637e-160	Mono.Macr	ICAM1
YWHAH.1	1.84745e-158	1.86597	0.683	0.335	3.90662e-154	Mono.Macr	YWHAH
GPX1.1	1.54318e-157	1.58724	0.956	0.922	3.2632e-153	Mono.Macr	GPX1
HLA-DRB5.1	3.80146e-151	2.9393	0.665	0.317	8.03856e-147	Mono.Macr	HLA-DRB5
CYBA.1	3.17312e-150	1.45715	0.949	0.88	6.70988e-146	Mono.Macr	CYBA
TMSB4X.1	1.20889e-149	0.988088	1	1	2.55632e-145	Mono.Macr	TMSB4X
ARL4C.1	2.75721e-148	0.976511	0.35	0.082	5.83039e-144	Mono.Macr	ARL4C
MAFB.1	1.36898e-145	1.3011	0.467	0.143	2.89484e-141	Mono.Macr	MAFB
LCP1.1	2.22129e-143	0.815789	0.329	0.075	4.69715e-139	Mono.Macr	LCP1
MGST1.1	4.05984e-141	-1.09248	0.625	0.963	8.58493e-137	Mono.Macr	MGST1
ANXA5.1	9.61247e-141	1.2802	0.554	0.224	2.03265e-136	Mono.Macr	ANXA5
KRT19.1	8.97791e-138	-1.13811	0.926	0.999	1.89847e-133	Mono.Macr	KRT19
S100P.1	7.25326e-137	-0.997862	0.923	0.998	1.53378e-132	Mono.Macr	S100P
APOC1.1	2.10149e-132	3.39102	0.628	0.317	4.44382e-128	Mono.Macr	APOC1
NCF4	4.06717e-132	0.534339	0.251	0.047	8.60045e-128	Mono.Macr	NCF4
CST3.1	1.32969e-130	1.33713	0.989	0.986	2.81177e-126	Mono.Macr	CST3
GSN.1	1.99576e-128	1.42437	0.626	0.311	4.22024e-124	Mono.Macr	GSN
DAB2.1	2.15195e-128	0.885047	0.327	0.08	4.5505e-124	Mono.Macr	DAB2
CAPG.1	5.80646e-127	1.3462	0.833	0.608	1.22783e-122	Mono.Macr	CAPG
CYB5A.1	5.82479e-127	-0.961018	0.575	0.923	1.23171e-122	Mono.Macr	CYB5A
TYMP.1	9.47843e-127	1.68313	0.694	0.389	2.00431e-122	Mono.Macr	TYMP
HTRA1.1	1.66566e-126	0.954528	0.276	0.06	3.52221e-122	Mono.Macr	HTRA1
NPC2.1	2.12242e-125	1.53556	0.934	0.891	4.48807e-121	Mono.Macr	NPC2
KRT8.1	1.92021e-122	-1.03909	0.634	0.946	4.06048e-118	Mono.Macr	KRT8
ADIRF.1	4.14301e-121	-1.44206	0.907	0.966	8.7608e-117	Mono.Macr	ADIRF
CD52.1	6.41879e-119	1.12078	0.254	0.053	1.35732e-114	Mono.Macr	CD52
B2M.1	2.83687e-118	1.04958	1	1	5.99885e-114	Mono.Macr	B2M
SAT1.1	3.40656e-117	1.42046	0.971	0.904	7.20352e-113	Mono.Macr	SAT1
CTSB.1	3.23167e-116	1.8601	0.764	0.575	6.83368e-112	Mono.Macr	CTSB
GMFG.1	1.06315e-115	1.03239	0.571	0.234	2.24813e-111	Mono.Macr	GMFG
TUBA1A.1	1.6823e-115	0.806582	0.311	0.077	3.55739e-111	Mono.Macr	TUBA1A
RAB31.1	1.60052e-114	0.92282	0.398	0.13	3.38446e-110	Mono.Macr	RAB31
PFN1.1	1.29028e-113	0.94824	0.983	0.98	2.72843e-109	Mono.Macr	PFN1
PSAP.1	1.06077e-111	1.59915	0.862	0.754	2.2431e-107	Mono.Macr	PSAP
FXYD3.1	9.88412e-110	-0.971468	0.86	0.996	2.0901e-105	Mono.Macr	FXYD3
PDLIM1.1	1.1197e-107	-1.13201	0.309	0.744	2.36771e-103	Mono.Macr	PDLIM1
AGR2.1	2.0398e-107	-1.04991	0.512	0.883	4.31335e-103	Mono.Macr	AGR2
ID1.1	2.53706e-106	-1.21511	0.755	0.967	5.36486e-102	Mono.Macr	ID1
UQCRH.1	2.86117e-106	-0.766874	0.911	0.983	6.05023e-102	Mono.Macr	UQCRH
C15orf48.1	2.65387e-104	1.52225	0.435	0.158	5.61188e-100	Mono.Macr	C15orf48
AKR1C3.1	6.29916e-103	-1.21992	0.44	0.813	1.33202e-98	Mono.Macr	AKR1C3
GPSM3.1	6.44721e-103	0.98609	0.471	0.19	1.36333e-98	Mono.Macr	GPSM3
G0S2.1	6.01468e-100	2.50264	0.365	0.118	1.27186e-95	Mono.Macr	G0S2
KRT7.1	8.64628e-100	-0.938956	0.709	0.966	1.82834e-95	Mono.Macr	KRT7
HSPA1A.1	9.62369e-100	1.8082	0.773	0.499	2.03503e-95	Mono.Macr	HSPA1A
ELF3.1	2.48067e-99	-0.953974	0.677	0.96	5.24562e-95	Mono.Macr	ELF3
PPT1.1	2.59834e-98	1.06169	0.523	0.247	5.49446e-94	Mono.Macr	PPT1
RHOG.1	1.36102e-97	1.0594	0.488	0.218	2.87802e-93	Mono.Macr	RHOG
HPGD.1	9.85434e-97	-1.11171	0.468	0.829	2.0838e-92	Mono.Macr	HPGD
VSIG2.1	8.26745e-96	-0.993388	0.404	0.791	1.74824e-91	Mono.Macr	VSIG2
CTSS.1	9.60443e-96	1.33218	0.625	0.371	2.03095e-91	Mono.Macr	CTSS
KRT18.1	5.78389e-95	-0.995114	0.626	0.935	1.22306e-90	Mono.Macr	KRT18
RPL23A.1	5.69572e-94	-0.491403	1	1	1.20442e-89	Mono.Macr	RPL23A
SDC1.1	2.97985e-93	-0.82769	0.477	0.893	6.30118e-89	Mono.Macr	SDC1
SH3KBP1	1.22108e-92	0.585313	0.279	0.075	2.5821e-88	Mono.Macr	SH3KBP1
PPDPF.1	2.19384e-92	-0.80994	0.841	0.992	4.6391e-88	Mono.Macr	PPDPF
TACSTD2.1	2.32658e-92	-0.781078	0.721	0.977	4.91979e-88	Mono.Macr	TACSTD2
RB1.1	3.86607e-92	0.921351	0.383	0.14	8.1752e-88	Mono.Macr	RB1
CXCL2.1	1.16756e-91	1.62992	0.402	0.143	2.46893e-87	Mono.Macr	CXCL2
AKR1C2.1	5.44575e-91	-0.804603	0.52	0.893	1.15156e-86	Mono.Macr	AKR1C2
SMIM22.1	1.87112e-90	-0.727929	0.527	0.934	3.95668e-86	Mono.Macr	SMIM22
CTSZ.1	5.29603e-90	1.22637	0.509	0.251	1.1199e-85	Mono.Macr	CTSZ
FXYD5.1	4.5564e-89	0.90592	0.761	0.504	9.63497e-85	Mono.Macr	FXYD5
KLF5.1	8.26826e-89	-0.837965	0.413	0.826	1.74841e-84	Mono.Macr	KLF5
C3	1.06064e-87	1.02599	0.336	0.112	2.24282e-83	Mono.Macr	C3
GRN.1	2.24771e-87	1.23661	0.832	0.759	4.75302e-83	Mono.Macr	GRN
PLAUR.1	4.23272e-86	1.72914	0.619	0.357	8.95052e-82	Mono.Macr	PLAUR
C10orf54.1	4.98913e-86	1.06902	0.449	0.195	1.055e-81	Mono.Macr	C10orf54
SERINC2.1	3.50629e-84	-0.795193	0.405	0.805	7.41439e-80	Mono.Macr	SERINC2
PSCA.1	8.88058e-84	-0.785241	0.776	0.966	1.87789e-79	Mono.Macr	PSCA
GPX2.1	1.67257e-83	-0.832238	0.562	0.897	3.53681e-79	Mono.Macr	GPX2
RPL30.1	3.95222e-83	-0.544055	0.994	0.999	8.35736e-79	Mono.Macr	RPL30
RPL41.1	1.87327e-82	-0.539731	1	1	3.96122e-78	Mono.Macr	RPL41
PRDX2.1	3.15394e-81	-0.753138	0.529	0.855	6.66933e-77	Mono.Macr	PRDX2
PPP1R18.1	4.96443e-81	0.54431	0.258	0.072	1.04978e-76	Mono.Macr	PPP1R18
NGFRAP1.1	5.31698e-81	-0.72773	0.575	0.905	1.12433e-76	Mono.Macr	NGFRAP1
TMSB10.1	1.11764e-80	0.591575	1	0.998	2.36336e-76	Mono.Macr	TMSB10
ARPC1B.1	4.35232e-80	0.948773	0.824	0.708	9.20342e-76	Mono.Macr	ARPC1B
DSTN	4.56631e-80	-0.644789	0.683	0.964	9.65592e-76	Mono.Macr	DSTN
SGK1.1	3.81942e-79	1.17484	0.571	0.292	8.07655e-75	Mono.Macr	SGK1
S100A6.1	4.11786e-79	-0.990975	0.998	0.998	8.70763e-75	Mono.Macr	S100A6
DHRS2.1	1.20673e-78	-1.00952	0.497	0.817	2.55176e-74	Mono.Macr	DHRS2
GATA3.1	3.87799e-78	-0.80721	0.387	0.777	8.2004e-74	Mono.Macr	GATA3
RPLP0.1	6.79331e-78	-0.614961	0.982	0.994	1.43651e-73	Mono.Macr	RPLP0
TBXAS1	7.19982e-78	0.605853	0.258	0.075	1.52247e-73	Mono.Macr	TBXAS1
FAM49B.1	1.38312e-77	0.935423	0.608	0.387	2.92474e-73	Mono.Macr	FAM49B
TSTD1.1	3.3715e-76	-0.673819	0.498	0.854	7.12938e-72	Mono.Macr	TSTD1
OCIAD2.1	6.63701e-76	-0.677579	0.429	0.834	1.40346e-71	Mono.Macr	OCIAD2
FABP5.1	1.31925e-75	-0.973241	0.823	0.961	2.78968e-71	Mono.Macr	FABP5
NR4A2.1	6.1238e-75	1.13378	0.554	0.296	1.29494e-70	Mono.Macr	NR4A2
LPAR6.1	7.03672e-75	0.959283	0.429	0.192	1.48799e-70	Mono.Macr	LPAR6
CD24.1	8.70804e-75	-1.33958	0.425	0.752	1.8414e-70	Mono.Macr	CD24
PLXDC2	1.44807e-74	0.609912	0.272	0.084	3.06208e-70	Mono.Macr	PLXDC2
PERP.1	1.53768e-73	-0.639114	0.518	0.928	3.25158e-69	Mono.Macr	PERP
ARHGDIB.1	3.53922e-73	1.02252	0.797	0.716	7.48404e-69	Mono.Macr	ARHGDIB
SRI.1	1.02704e-72	-0.852074	0.596	0.846	2.17178e-68	Mono.Macr	SRI
TP53TG1.1	1.09407e-72	-0.639178	0.401	0.788	2.31352e-68	Mono.Macr	TP53TG1
RPLP1.1	1.03476e-71	-0.367979	1	1	2.18811e-67	Mono.Macr	RPLP1
S100A4.1	1.55458e-71	0.568537	0.854	0.562	3.28731e-67	Mono.Macr	S100A4
MDK.1	2.26496e-71	-0.933258	0.494	0.822	4.78949e-67	Mono.Macr	MDK
NR4A3	9.59273e-71	0.944135	0.293	0.101	2.02848e-66	Mono.Macr	NR4A3
RPL19.1	1.35922e-70	-0.357079	1	1	2.87421e-66	Mono.Macr	RPL19
RPL3.1	2.91959e-70	-0.579219	0.997	1	6.17377e-66	Mono.Macr	RPL3
RAB25.1	3.38937e-70	-0.685369	0.333	0.728	7.16717e-66	Mono.Macr	RAB25
CXCL16.1	3.88313e-70	0.916036	0.452	0.222	8.21126e-66	Mono.Macr	CXCL16
SNCG.1	1.16028e-69	-0.87778	0.658	0.922	2.45353e-65	Mono.Macr	SNCG
CLDN4.1	8.10069e-69	-0.937368	0.721	0.905	1.71297e-64	Mono.Macr	CLDN4
ATP6V1B2.1	1.7426e-68	0.710236	0.312	0.114	3.68489e-64	Mono.Macr	ATP6V1B2
KRT10.1	4.00131e-68	-0.629295	0.625	0.901	8.46116e-64	Mono.Macr	KRT10
RGCC.1	5.68712e-67	1.07243	0.312	0.112	1.2026e-62	Mono.Macr	RGCC
CTSC.1	6.14625e-67	0.962835	0.683	0.462	1.29969e-62	Mono.Macr	CTSC
CXADR.1	8.84707e-67	-0.626167	0.341	0.741	1.8708e-62	Mono.Macr	CXADR
RAC2.1	1.04344e-66	0.68396	0.293	0.103	2.20646e-62	Mono.Macr	RAC2
RGS19	1.8357e-66	0.584835	0.314	0.116	3.88178e-62	Mono.Macr	RGS19
FAM213A.1	3.12842e-66	-0.684534	0.404	0.745	6.61536e-62	Mono.Macr	FAM213A
CRTAC1.1	2.63011e-65	-1.10949	0.138	0.478	5.56164e-61	Mono.Macr	CRTAC1
CXCL8.1	2.88262e-65	1.63308	0.644	0.394	6.0956e-61	Mono.Macr	CXCL8
FCGRT.1	4.35819e-65	1.27199	0.634	0.478	9.21584e-61	Mono.Macr	FCGRT
CSTB.1	1.34583e-64	-1.12314	0.932	0.974	2.84589e-60	Mono.Macr	CSTB
SPINK1.1	1.57592e-64	-1.179	0.772	0.847	3.33243e-60	Mono.Macr	SPINK1
RNASET2.1	1.88505e-64	1.12253	0.745	0.623	3.98614e-60	Mono.Macr	RNASET2
FABP6.1	2.31272e-64	-0.649179	0.183	0.556	4.89048e-60	Mono.Macr	FABP6
SHFM1.1	2.95808e-64	-0.542909	0.782	0.95	6.25516e-60	Mono.Macr	SHFM1
OAZ1.1	5.27322e-64	0.524451	0.986	0.981	1.11508e-59	Mono.Macr	OAZ1
TNFAIP3.1	2.19267e-63	1.21618	0.449	0.23	4.63663e-59	Mono.Macr	TNFAIP3
HMOX1	1.03727e-62	0.804013	0.308	0.115	2.1934e-58	Mono.Macr	HMOX1
PLPP2.1	1.32308e-62	-0.610819	0.26	0.639	2.79778e-58	Mono.Macr	PLPP2
RPL35A.1	1.49371e-62	-0.449391	0.995	1	3.15861e-58	Mono.Macr	RPL35A
RPS18.1	4.06985e-62	-0.488743	0.998	1	8.6061e-58	Mono.Macr	RPS18
GSTP1.1	4.18441e-62	-0.624337	0.92	0.979	8.84835e-58	Mono.Macr	GSTP1
RPL37.1	5.20459e-62	-0.480175	0.995	1	1.10056e-57	Mono.Macr	RPL37
EHF.1	1.55926e-61	-0.638446	0.21	0.57	3.29721e-57	Mono.Macr	EHF
PFN2.1	2.09061e-61	-0.586609	0.221	0.595	4.42081e-57	Mono.Macr	PFN2
BTBD16.1	2.11299e-61	-0.748629	0.182	0.523	4.46812e-57	Mono.Macr	BTBD16
LYN	2.28614e-61	0.585284	0.278	0.1	4.83428e-57	Mono.Macr	LYN
KRT17.1	4.95533e-61	-1.07017	0.794	0.901	1.04785e-56	Mono.Macr	KRT17
MPZL2.1	6.56026e-61	-0.627925	0.291	0.664	1.38723e-56	Mono.Macr	MPZL2
TESC.1	7.57532e-61	-0.85497	0.203	0.557	1.60188e-56	Mono.Macr	TESC
LITAF.1	1.17072e-60	0.89613	0.752	0.644	2.47562e-56	Mono.Macr	LITAF
CTSD.1	1.71887e-60	1.20176	0.886	0.856	3.63472e-56	Mono.Macr	CTSD
ZFAS1.1	2.27325e-60	-0.629883	0.767	0.937	4.80701e-56	Mono.Macr	ZFAS1
SNX10	2.61138e-60	0.588133	0.261	0.09	5.52203e-56	Mono.Macr	SNX10
IGFBP3.1	6.57391e-60	-1.13561	0.29	0.617	1.39012e-55	Mono.Macr	IGFBP3
ARHGAP18.1	7.73829e-60	0.609527	0.296	0.112	1.63634e-55	Mono.Macr	ARHGAP18
C16orf74.1	1.02102e-59	-0.621584	0.168	0.51	2.15904e-55	Mono.Macr	C16orf74
FBLN1.1	3.77339e-59	-0.963052	0.281	0.626	7.97921e-55	Mono.Macr	FBLN1
HSD17B2.1	9.24052e-59	-0.835539	0.119	0.439	1.954e-54	Mono.Macr	HSD17B2
MFSD1.1	9.58495e-59	0.753205	0.423	0.214	2.02683e-54	Mono.Macr	MFSD1
AQP3.1	1.14371e-58	-0.768563	0.417	0.752	2.41849e-54	Mono.Macr	AQP3
RPS21.1	2.83256e-58	-0.39048	0.988	0.998	5.98973e-54	Mono.Macr	RPS21
CYP4B1.1	3.05924e-58	-0.760338	0.329	0.681	6.46906e-54	Mono.Macr	CYP4B1
CARD16.1	1.6343e-57	0.722919	0.384	0.18	3.4559e-53	Mono.Macr	CARD16
ZNF331.1	2.09179e-57	0.901834	0.41	0.195	4.42329e-53	Mono.Macr	ZNF331
CAMK2N1.1	2.43096e-57	-0.82645	0.311	0.652	5.1405e-53	Mono.Macr	CAMK2N1
TUBA1B.1	2.9466e-57	1.10202	0.827	0.743	6.23087e-53	Mono.Macr	TUBA1B
AKR1C1.1	1.64313e-56	-0.810797	0.183	0.513	3.47457e-52	Mono.Macr	AKR1C1
RPS8.1	4.46193e-56	-0.476113	0.998	1	9.4352e-52	Mono.Macr	RPS8
H2AFJ.1	1.07567e-55	-0.697378	0.593	0.848	2.27461e-51	Mono.Macr	H2AFJ
CDC42EP5.1	1.17631e-55	-0.678247	0.165	0.495	2.48743e-51	Mono.Macr	CDC42EP5
RPS7.1	1.49939e-55	-0.42204	0.992	0.999	3.17061e-51	Mono.Macr	RPS7
RPS2.1	1.81303e-55	-0.456886	0.998	1	3.83382e-51	Mono.Macr	RPS2
RPL22.1	1.87411e-55	-0.425214	0.986	0.996	3.963e-51	Mono.Macr	RPL22
HLA-C.1	2.58281e-55	1.01846	0.902	0.89	5.4616e-51	Mono.Macr	HLA-C
RPS28.1	7.81552e-55	-0.345733	0.998	1	1.65267e-50	Mono.Macr	RPS28
OST4.1	1.50813e-54	-0.416987	0.917	0.984	3.1891e-50	Mono.Macr	OST4
HLA-B.1	1.8547e-54	1.0046	0.961	0.928	3.92194e-50	Mono.Macr	HLA-B
RPL36.1	6.24123e-54	-0.421249	0.997	1	1.31977e-49	Mono.Macr	RPL36
NACA.1	6.73964e-54	-0.445736	0.977	0.988	1.42516e-49	Mono.Macr	NACA
ID2.1	1.54313e-53	0.968706	0.766	0.633	3.2631e-49	Mono.Macr	ID2
JUP.1	3.22189e-53	-0.633982	0.284	0.621	6.813e-49	Mono.Macr	JUP
GNAI2.1	6.86986e-53	0.823907	0.471	0.28	1.4527e-48	Mono.Macr	GNAI2
PRDX5.1	1.17381e-52	-0.48062	0.839	0.977	2.48213e-48	Mono.Macr	PRDX5
DUSP1.1	1.47953e-52	0.98658	0.889	0.76	3.12861e-48	Mono.Macr	DUSP1
RPL10A.1	2.74592e-52	-0.532665	0.994	0.998	5.80652e-48	Mono.Macr	RPL10A
CLDN7.1	4.17507e-52	-0.67181	0.317	0.634	8.8286e-48	Mono.Macr	CLDN7
NQO1.1	7.37787e-52	-0.693664	0.221	0.538	1.56012e-47	Mono.Macr	NQO1
CTSE.1	1.03608e-51	-0.814321	0.143	0.441	2.1909e-47	Mono.Macr	CTSE
RPS4X.1	1.13795e-51	-0.534152	0.995	0.999	2.40631e-47	Mono.Macr	RPS4X
RPL31.1	1.76334e-51	-0.524295	0.997	1	3.72877e-47	Mono.Macr	RPL31
ID3	2.53843e-51	-1.07981	0.656	0.836	5.36777e-47	Mono.Macr	ID3
MAL2.1	2.68383e-51	-0.677326	0.197	0.515	5.67523e-47	Mono.Macr	MAL2
RPL13A.1	3.65777e-51	-0.427954	1	1	7.73471e-47	Mono.Macr	RPL13A
UQCRQ.1	6.94226e-51	-0.48615	0.898	0.988	1.46801e-46	Mono.Macr	UQCRQ
RPL24.1	7.07506e-51	-0.379088	0.988	0.998	1.49609e-46	Mono.Macr	RPL24
TMEM97.1	8.40647e-51	-1.02291	0.258	0.56	1.77763e-46	Mono.Macr	TMEM97
FTL.1	9.13542e-51	0.876367	1	1	1.93178e-46	Mono.Macr	FTL
BCAM.1	2.17896e-50	-0.831778	0.143	0.434	4.60763e-46	Mono.Macr	BCAM
SDCBP.1	8.30279e-50	0.898908	0.706	0.601	1.75571e-45	Mono.Macr	SDCBP
TXNDC17.1	2.57483e-49	-0.592524	0.643	0.874	5.44474e-45	Mono.Macr	TXNDC17
SPINT2.1	2.68757e-49	-0.554487	0.683	0.895	5.68313e-45	Mono.Macr	SPINT2
EPSTI1.1	3.55743e-49	0.742549	0.321	0.143	7.52254e-45	Mono.Macr	EPSTI1
PTGR1.1	1.34218e-48	-0.763286	0.254	0.545	2.83818e-44	Mono.Macr	PTGR1
TNFRSF21.1	2.56917e-48	-0.581165	0.32	0.632	5.43277e-44	Mono.Macr	TNFRSF21
TMEM54.1	3.21785e-48	-0.539152	0.251	0.567	6.80446e-44	Mono.Macr	TMEM54
RPS6.1	5.99812e-48	-0.629112	0.998	1	1.26836e-43	Mono.Macr	RPS6
APOL1.1	1.65404e-47	-0.571867	0.218	0.524	3.49764e-43	Mono.Macr	APOL1
HES1.1	1.72603e-47	-0.662899	0.668	0.913	3.64986e-43	Mono.Macr	HES1
TIMP3	1.8393e-47	-0.663273	0.135	0.429	3.88938e-43	Mono.Macr	TIMP3
ERRFI1.1	3.23827e-47	-0.785569	0.294	0.596	6.84764e-43	Mono.Macr	ERRFI1
BTG2.1	9.73175e-47	-0.91032	0.743	0.855	2.05787e-42	Mono.Macr	BTG2
RPL14.1	1.03293e-46	-0.359235	0.995	0.999	2.18423e-42	Mono.Macr	RPL14
SLC14A1	1.28236e-46	-0.588189	0.132	0.42	2.71168e-42	Mono.Macr	SLC14A1
CREM.1	1.65765e-46	1.02045	0.387	0.211	3.50526e-42	Mono.Macr	CREM
ARPC3.1	1.67097e-46	0.541862	0.916	0.918	3.53343e-42	Mono.Macr	ARPC3
RPS27A.1	1.87732e-46	-0.389269	1	0.999	3.96978e-42	Mono.Macr	RPS27A
TINAGL1.1	1.9641e-46	-0.636859	0.33	0.647	4.15328e-42	Mono.Macr	TINAGL1
IGFBP5.1	2.01638e-46	-1.04848	0.149	0.425	4.26384e-42	Mono.Macr	IGFBP5
PPARG.1	2.69704e-46	-0.488048	0.189	0.5	5.70316e-42	Mono.Macr	PPARG
IGFBP2.1	2.7733e-46	-0.927376	0.315	0.601	5.86442e-42	Mono.Macr	IGFBP2
NSG1.1	3.78371e-46	-0.630227	0.164	0.452	8.00104e-42	Mono.Macr	NSG1
SCCPDH.1	4.74943e-46	-0.499711	0.44	0.764	1.00431e-41	Mono.Macr	SCCPDH
RPL37A.1	8.4153e-46	-0.347921	0.997	0.999	1.7795e-41	Mono.Macr	RPL37A
RPS3.1	9.05225e-46	-0.38938	1	0.999	1.91419e-41	Mono.Macr	RPS3
SFN.1	1.21041e-45	-0.840844	0.529	0.777	2.55952e-41	Mono.Macr	SFN
TOB1.1	1.21091e-45	-0.590468	0.459	0.774	2.56059e-41	Mono.Macr	TOB1
AES	1.37462e-45	-0.526962	0.393	0.706	2.90678e-41	Mono.Macr	AES
BTF3.1	1.57518e-45	-0.525923	0.944	0.977	3.33088e-41	Mono.Macr	BTF3
TPP1.1	1.99707e-45	0.686364	0.39	0.21	4.223e-41	Mono.Macr	TPP1
HOOK2.1	7.04281e-45	-0.484007	0.239	0.559	1.48927e-40	Mono.Macr	HOOK2
S100A13	9.50644e-45	-0.586581	0.318	0.622	2.01023e-40	Mono.Macr	S100A13
MAOA.1	1.71211e-44	-0.462466	0.185	0.492	3.62042e-40	Mono.Macr	MAOA
SOD1.1	3.52845e-44	-0.443542	0.812	0.947	7.46126e-40	Mono.Macr	SOD1
RPL32.1	3.59839e-44	-0.369233	1	1	7.60916e-40	Mono.Macr	RPL32
FBP1.1	6.0682e-44	-0.690032	0.333	0.608	1.28318e-39	Mono.Macr	FBP1
SNHG18.1	6.55738e-44	-0.569594	0.15	0.443	1.38662e-39	Mono.Macr	SNHG18
TRAF4.1	7.19462e-44	-0.636822	0.303	0.604	1.52137e-39	Mono.Macr	TRAF4
BLCAP.1	7.5518e-44	-0.515948	0.279	0.584	1.5969e-39	Mono.Macr	BLCAP
HINT1.1	7.72482e-44	-0.470497	0.899	0.971	1.63349e-39	Mono.Macr	HINT1
RHOA.1	1.42771e-43	0.592003	0.823	0.759	3.01903e-39	Mono.Macr	RHOA
EPCAM.1	1.62716e-43	-0.486061	0.159	0.453	3.44079e-39	Mono.Macr	EPCAM
PPIC	4.45648e-43	-0.430732	0.276	0.597	9.42368e-39	Mono.Macr	PPIC
PHLDA3.1	4.61659e-43	-0.615814	0.225	0.513	9.76225e-39	Mono.Macr	PHLDA3
SH3BGRL3.1	4.63443e-43	0.623396	0.931	0.944	9.79997e-39	Mono.Macr	SH3BGRL3
S100A2.1	2.66266e-42	-0.604872	0.661	0.864	5.63045e-38	Mono.Macr	S100A2
SNRPD2.1	3.42829e-42	-0.412059	0.85	0.958	7.24947e-38	Mono.Macr	SNRPD2
GADD45B.1	3.77563e-42	1.03897	0.697	0.559	7.98394e-38	Mono.Macr	GADD45B
C12orf57	3.91631e-42	-0.461743	0.545	0.837	8.28143e-38	Mono.Macr	C12orf57
SPOCD1.1	6.49673e-42	-0.675855	0.129	0.398	1.3738e-37	Mono.Macr	SPOCD1
LIMS1.1	7.83542e-42	0.729344	0.562	0.414	1.65688e-37	Mono.Macr	LIMS1
RPL8.1	1.05109e-41	-0.369246	0.998	1	2.22263e-37	Mono.Macr	RPL8
PSMB9.1	1.46239e-41	0.723696	0.497	0.325	3.09238e-37	Mono.Macr	PSMB9
CKLF.1	1.47666e-41	0.99324	0.641	0.543	3.12254e-37	Mono.Macr	CKLF
MYL12B	1.93462e-41	-0.461312	0.838	0.943	4.09094e-37	Mono.Macr	MYL12B
KRTCAP3.1	3.01781e-41	-0.472228	0.213	0.502	6.38147e-37	Mono.Macr	KRTCAP3
HERPUD1.1	3.18525e-41	1.06556	0.779	0.689	6.73553e-37	Mono.Macr	HERPUD1
SOX4.1	6.14106e-41	-0.568722	0.479	0.779	1.29859e-36	Mono.Macr	SOX4
OVOL1.1	3.45298e-40	-0.668049	0.209	0.488	7.30167e-36	Mono.Macr	OVOL1
GSTM3.1	3.50033e-40	-1.24364	0.488	0.697	7.4018e-36	Mono.Macr	GSTM3
GADD45A.1	3.97697e-40	-0.733398	0.35	0.629	8.4097e-36	Mono.Macr	GADD45A
MT2A.1	7.4222e-40	1.45153	0.542	0.392	1.5695e-35	Mono.Macr	MT2A
NFKBIA.1	1.04587e-39	0.959685	0.869	0.811	2.2116e-35	Mono.Macr	NFKBIA
WFDC2.1	1.46164e-39	-0.643978	0.306	0.611	3.09079e-35	Mono.Macr	WFDC2
RP11-532F12.5.1	1.5892e-39	-0.428005	0.227	0.518	3.36052e-35	Mono.Macr	RP11-532F12.5
RAB13	1.60614e-39	-0.422507	0.432	0.749	3.39635e-35	Mono.Macr	RAB13
RPL39.1	1.87483e-39	-0.369766	1	1	3.96451e-35	Mono.Macr	RPL39
HLA-E.1	3.99161e-39	0.766344	0.817	0.784	8.44066e-35	Mono.Macr	HLA-E
RPS5.1	4.85927e-39	-0.336487	0.989	0.999	1.02754e-34	Mono.Macr	RPS5
PEBP1.1	6.44996e-39	-0.493533	0.652	0.837	1.36391e-34	Mono.Macr	PEBP1
TBX3.1	8.66087e-39	-0.469063	0.194	0.474	1.83143e-34	Mono.Macr	TBX3
RPL11.1	1.03505e-38	-0.335644	1	1	2.18872e-34	Mono.Macr	RPL11
ROMO1.1	1.16166e-38	-0.40158	0.689	0.908	2.45645e-34	Mono.Macr	ROMO1
IFITM2.1	1.53128e-38	0.748535	0.332	0.166	3.23805e-34	Mono.Macr	IFITM2
C10orf99.1	1.97538e-38	-0.584275	0.261	0.554	4.17715e-34	Mono.Macr	C10orf99
SCN11A.1	2.96168e-38	-0.519821	0.044	0.27	6.26278e-34	Mono.Macr	SCN11A
NFKBID	3.64411e-38	0.562468	0.252	0.109	7.70584e-34	Mono.Macr	NFKBID
COLCA1.1	3.83523e-38	-0.392786	0.057	0.292	8.10997e-34	Mono.Macr	COLCA1
GPRC5C.1	4.73009e-38	-0.438183	0.188	0.465	1.00023e-33	Mono.Macr	GPRC5C
GRB2.1	9.03989e-38	0.617272	0.425	0.264	1.91158e-33	Mono.Macr	GRB2
CAPZB.1	9.82336e-38	0.62285	0.748	0.695	2.07725e-33	Mono.Macr	CAPZB
LYPD6B.1	1.10948e-37	-0.374797	0.126	0.391	2.3461e-33	Mono.Macr	LYPD6B
SOD2.1	2.74157e-37	1.48075	0.602	0.49	5.79733e-33	Mono.Macr	SOD2
PVRL4.1	4.87573e-37	-0.41762	0.21	0.498	1.03102e-32	Mono.Macr	PVRL4
ATP8B1.1	5.0577e-37	-0.381209	0.131	0.391	1.0695e-32	Mono.Macr	ATP8B1
PCBD1.1	5.3073e-37	-0.461451	0.491	0.756	1.12228e-32	Mono.Macr	PCBD1
TSPAN13.1	5.35838e-37	-0.371823	0.263	0.56	1.13308e-32	Mono.Macr	TSPAN13
NUDT4.1	6.92473e-37	-0.447229	0.372	0.669	1.4643e-32	Mono.Macr	NUDT4
THEM6.1	6.96616e-37	-0.407374	0.143	0.401	1.47307e-32	Mono.Macr	THEM6
EI24.1	9.9736e-37	-0.443146	0.348	0.633	2.10902e-32	Mono.Macr	EI24
NDFIP2.1	1.01137e-36	-0.409688	0.227	0.525	2.13865e-32	Mono.Macr	NDFIP2
ADI1	1.12461e-36	-0.46234	0.414	0.702	2.37809e-32	Mono.Macr	ADI1
TSC22D1	1.74188e-36	-0.608413	0.381	0.656	3.68338e-32	Mono.Macr	TSC22D1
NDUFS5	1.85583e-36	-0.436397	0.812	0.95	3.92434e-32	Mono.Macr	NDUFS5
CASP1.1	3.34964e-36	0.644357	0.303	0.153	7.08314e-32	Mono.Macr	CASP1
NDUFC1.1	3.4328e-36	-0.429264	0.565	0.815	7.25899e-32	Mono.Macr	NDUFC1
RPS14	9.68401e-36	-0.283367	1	1	2.04778e-31	Mono.Macr	RPS14
LSR.1	1.06538e-35	-0.418422	0.266	0.554	2.25284e-31	Mono.Macr	LSR
ID4	1.19791e-35	-0.431622	0.126	0.378	2.53311e-31	Mono.Macr	ID4
EFNA1.1	1.30604e-35	-0.465721	0.254	0.539	2.76176e-31	Mono.Macr	EFNA1
KTN1.1	1.57831e-35	-0.351179	0.65	0.886	3.3375e-31	Mono.Macr	KTN1
PTGS2	1.71482e-35	0.50328	0.258	0.11	3.62616e-31	Mono.Macr	PTGS2
SERPINB5.1	2.66163e-35	-0.465458	0.17	0.431	5.62827e-31	Mono.Macr	SERPINB5
RALBP1.1	5.49352e-35	-0.764373	0.368	0.617	1.16166e-30	Mono.Macr	RALBP1
HES4.1	7.37266e-35	-0.530583	0.455	0.715	1.55902e-30	Mono.Macr	HES4
HILPDA.1	7.79232e-35	-0.924072	0.131	0.368	1.64776e-30	Mono.Macr	HILPDA
STEAP1.1	8.15245e-35	-0.440594	0.093	0.33	1.72392e-30	Mono.Macr	STEAP1
LINC00493.1	1.57366e-34	-0.408764	0.574	0.826	3.32765e-30	Mono.Macr	LINC00493
ODF2L	2.14064e-34	-0.372598	0.156	0.412	4.52659e-30	Mono.Macr	ODF2L
PABPC1.1	2.18087e-34	-0.435018	0.916	0.964	4.61166e-30	Mono.Macr	PABPC1
FAM162A.1	2.238e-34	-0.560061	0.545	0.783	4.73247e-30	Mono.Macr	FAM162A
IGFBP4	2.46399e-34	-0.47784	0.248	0.517	5.21034e-30	Mono.Macr	IGFBP4
SSH3.1	2.76223e-34	-0.360417	0.165	0.425	5.84102e-30	Mono.Macr	SSH3
IGFBP7.1	2.89265e-34	-1.01421	0.156	0.394	6.1168e-30	Mono.Macr	IGFBP7
MAST4.1	4.6094e-34	-0.41334	0.234	0.515	9.74704e-30	Mono.Macr	MAST4
PNRC1.1	5.2755e-34	0.90772	0.727	0.671	1.11556e-29	Mono.Macr	PNRC1
ARPC1A	5.70031e-34	-0.393145	0.368	0.647	1.20539e-29	Mono.Macr	ARPC1A
MRPS33.1	7.02819e-34	-0.429228	0.413	0.682	1.48618e-29	Mono.Macr	MRPS33
ATPIF1.1	7.63578e-34	-0.407965	0.701	0.894	1.61466e-29	Mono.Macr	ATPIF1
TXN.1	8.96124e-34	-0.460468	0.805	0.935	1.89494e-29	Mono.Macr	TXN
PIR.1	9.84466e-34	-0.425356	0.11	0.344	2.08175e-29	Mono.Macr	PIR
SLC2A1.1	1.01213e-33	-0.517287	0.219	0.482	2.14026e-29	Mono.Macr	SLC2A1
AP2S1.1	1.26645e-33	0.619789	0.752	0.717	2.67803e-29	Mono.Macr	AP2S1
FHL2	1.55241e-33	-0.504015	0.173	0.419	3.28272e-29	Mono.Macr	FHL2
NINJ1.1	1.72584e-33	0.803292	0.458	0.321	3.64946e-29	Mono.Macr	NINJ1
RPS12	2.07361e-33	-0.307215	1	0.999	4.38485e-29	Mono.Macr	RPS12
LAPTM4B	2.34043e-33	-0.41801	0.116	0.345	4.94907e-29	Mono.Macr	LAPTM4B
MIF.1	2.40575e-33	-0.434738	0.671	0.889	5.08719e-29	Mono.Macr	MIF
SOWAHC.1	2.53677e-33	-0.44641	0.141	0.388	5.36425e-29	Mono.Macr	SOWAHC
RPL7.1	4.10243e-33	-0.592895	0.998	0.999	8.67501e-29	Mono.Macr	RPL7
TSPAN6.1	4.93742e-33	-0.383256	0.207	0.477	1.04407e-28	Mono.Macr	TSPAN6
HEBP2.1	4.94079e-33	-0.479666	0.423	0.697	1.04478e-28	Mono.Macr	HEBP2
S100A16.1	4.99661e-33	-0.528974	0.405	0.673	1.05658e-28	Mono.Macr	S100A16
TMEM14A.1	5.14623e-33	-0.387152	0.377	0.669	1.08822e-28	Mono.Macr	TMEM14A
RPL15.1	6.94017e-33	-0.369921	1	1	1.46757e-28	Mono.Macr	RPL15
ANXA10.1	7.00275e-33	-0.48662	0.06	0.269	1.4808e-28	Mono.Macr	ANXA10
MIEN1.1	8.31498e-33	-0.405644	0.402	0.676	1.75829e-28	Mono.Macr	MIEN1
SYTL1.1	9.63377e-33	-0.383762	0.213	0.479	2.03716e-28	Mono.Macr	SYTL1
NAMPT.1	9.92073e-33	0.741842	0.635	0.548	2.09784e-28	Mono.Macr	NAMPT
CTSL.1	1.09932e-32	0.90957	0.389	0.237	2.32462e-28	Mono.Macr	CTSL
CROT.1	1.15394e-32	-0.420562	0.209	0.466	2.44012e-28	Mono.Macr	CROT
GIPC1.1	1.28722e-32	-0.396845	0.246	0.513	2.72195e-28	Mono.Macr	GIPC1
RPL18A	1.32695e-32	-0.29532	1	1	2.80596e-28	Mono.Macr	RPL18A
CDC42EP4.1	1.89303e-32	-0.444368	0.125	0.357	4.00299e-28	Mono.Macr	CDC42EP4
FAM3C.1	2.05957e-32	-0.426821	0.252	0.52	4.35516e-28	Mono.Macr	FAM3C
LDHB.1	3.19826e-32	-0.501043	0.689	0.835	6.76305e-28	Mono.Macr	LDHB
WDR72.1	4.7446e-32	-0.360561	0.066	0.283	1.00329e-27	Mono.Macr	WDR72
RP11-44F21.5.1	4.83509e-32	-0.344716	0.164	0.415	1.02243e-27	Mono.Macr	RP11-44F21.5
HOXB7.1	5.39029e-32	-0.335923	0.168	0.426	1.13983e-27	Mono.Macr	HOXB7
HLA-A.1	9.14307e-32	0.749411	0.893	0.874	1.93339e-27	Mono.Macr	HLA-A
AP1M2.1	9.91394e-32	-0.333301	0.147	0.389	2.0964e-27	Mono.Macr	AP1M2
KCNJ15.1	1.08827e-31	-0.331649	0.083	0.301	2.30125e-27	Mono.Macr	KCNJ15
MTX2.1	1.8469e-31	-0.357369	0.23	0.49	3.90546e-27	Mono.Macr	MTX2
DDR1.1	2.19873e-31	-0.346035	0.149	0.385	4.64943e-27	Mono.Macr	DDR1
SYT8.1	2.26455e-31	-0.488763	0.408	0.662	4.78862e-27	Mono.Macr	SYT8
AIG1.1	2.59862e-31	-0.406044	0.368	0.632	5.49504e-27	Mono.Macr	AIG1
LAD1.1	4.22399e-31	-0.324875	0.231	0.506	8.93205e-27	Mono.Macr	LAD1
PAFAH1B3.1	4.3335e-31	-0.397699	0.258	0.517	9.16363e-27	Mono.Macr	PAFAH1B3
EPHA2.1	5.01491e-31	-0.403019	0.185	0.43	1.06045e-26	Mono.Macr	EPHA2
SMCO4	5.81793e-31	0.439642	0.258	0.122	1.23026e-26	Mono.Macr	SMCO4
C19orf33.1	7.35188e-31	-0.334787	0.408	0.693	1.55463e-26	Mono.Macr	C19orf33
COX7C.1	9.36938e-31	-0.307062	0.976	0.997	1.98125e-26	Mono.Macr	COX7C
PNKD	1.14477e-30	-0.379662	0.371	0.643	2.42074e-26	Mono.Macr	PNKD
CAPS.1	1.36612e-30	-0.521008	0.347	0.591	2.88879e-26	Mono.Macr	CAPS
IRF6.1	1.40301e-30	-0.347656	0.189	0.444	2.96681e-26	Mono.Macr	IRF6
WBP5	1.59416e-30	-0.456587	0.5	0.736	3.37101e-26	Mono.Macr	WBP5
HACD3.1	1.80869e-30	-0.314522	0.264	0.537	3.82466e-26	Mono.Macr	HACD3
RCN2	2.37546e-30	-0.326667	0.359	0.634	5.02315e-26	Mono.Macr	RCN2
GID8.1	2.8039e-30	-0.334787	0.237	0.493	5.92913e-26	Mono.Macr	GID8
FAM84A.1	3.04519e-30	-0.556617	0.212	0.453	6.43937e-26	Mono.Macr	FAM84A
SYPL1.1	3.1502e-30	-0.405894	0.538	0.809	6.66142e-26	Mono.Macr	SYPL1
LAMB3.1	3.48897e-30	-0.418437	0.213	0.452	7.37778e-26	Mono.Macr	LAMB3
CFL1.1	3.51669e-30	0.371863	0.97	0.981	7.43639e-26	Mono.Macr	CFL1
RHOBTB3	4.81086e-30	-0.40574	0.171	0.413	1.01731e-25	Mono.Macr	RHOBTB3
PLCXD2.1	5.71201e-30	-0.341977	0.065	0.265	1.20786e-25	Mono.Macr	PLCXD2
CNN3	6.52131e-30	-0.37107	0.21	0.46	1.379e-25	Mono.Macr	CNN3
CLU.1	6.72452e-30	-0.588082	0.428	0.679	1.42197e-25	Mono.Macr	CLU
TMEM134.1	7.57506e-30	-0.435222	0.444	0.689	1.60182e-25	Mono.Macr	TMEM134
MSI2.1	1.0456e-29	-0.32788	0.212	0.465	2.21102e-25	Mono.Macr	MSI2
TSC22D3.1	1.06097e-29	0.83013	0.523	0.394	2.24354e-25	Mono.Macr	TSC22D3
SLC38A1.1	1.42265e-29	-0.364989	0.221	0.469	3.00834e-25	Mono.Macr	SLC38A1
LYPD3.1	1.69187e-29	-0.454116	0.36	0.623	3.57764e-25	Mono.Macr	LYPD3
RPS17.1	1.76695e-29	-0.357038	0.997	0.999	3.73639e-25	Mono.Macr	RPS17
CTTN.1	1.86874e-29	-0.404194	0.296	0.563	3.95165e-25	Mono.Macr	CTTN
PRSS23	1.99785e-29	-0.4386	0.074	0.274	4.22466e-25	Mono.Macr	PRSS23
PLPP1	2.13518e-29	-0.372596	0.227	0.477	4.51506e-25	Mono.Macr	PLPP1
NDUFB4	2.24974e-29	-0.369595	0.707	0.886	4.75729e-25	Mono.Macr	NDUFB4
EMP2.1	2.64241e-29	-0.409432	0.35	0.612	5.58764e-25	Mono.Macr	EMP2
AC090498.1.1	2.67584e-29	-0.420202	0.587	0.809	5.65832e-25	Mono.Macr	AC090498.1
ARPC5.1	2.73624e-29	0.4366	0.764	0.72	5.78605e-25	Mono.Macr	ARPC5
FAM3B.1	2.88386e-29	-0.496588	0.252	0.484	6.09821e-25	Mono.Macr	FAM3B
CD9.1	3.65883e-29	-0.40108	0.817	0.962	7.73697e-25	Mono.Macr	CD9
PTPN6	3.91664e-29	0.486984	0.296	0.158	8.28212e-25	Mono.Macr	PTPN6
SPTSSB.1	4.69285e-29	-0.572137	0.209	0.441	9.9235e-25	Mono.Macr	SPTSSB
CCND1.1	7.26111e-29	-0.819154	0.521	0.72	1.53543e-24	Mono.Macr	CCND1
MANBAL	7.48697e-29	-0.314497	0.168	0.404	1.58319e-24	Mono.Macr	MANBAL
CAP1.1	9.70316e-29	0.589879	0.653	0.602	2.05183e-24	Mono.Macr	CAP1
GATA2.1	1.00689e-28	-0.445159	0.132	0.342	2.12918e-24	Mono.Macr	GATA2
FDPS.1	1.61571e-28	-0.620537	0.336	0.582	3.41659e-24	Mono.Macr	FDPS
POLR2J.1	1.67943e-28	-0.407054	0.515	0.754	3.55132e-24	Mono.Macr	POLR2J
BCAS1.1	2.03942e-28	-0.326934	0.173	0.405	4.31256e-24	Mono.Macr	BCAS1
CRB3.1	2.06459e-28	-0.377527	0.197	0.427	4.36579e-24	Mono.Macr	CRB3
TUSC3	2.10659e-28	-0.330337	0.215	0.459	4.4546e-24	Mono.Macr	TUSC3
REXO2	2.16921e-28	-0.364254	0.284	0.534	4.58702e-24	Mono.Macr	REXO2
RTN4.1	3.2809e-28	-0.370091	0.779	0.93	6.93778e-24	Mono.Macr	RTN4
EPS8	3.32621e-28	-0.305492	0.167	0.405	7.03361e-24	Mono.Macr	EPS8
STARD10.1	4.01175e-28	-0.320153	0.128	0.345	8.48325e-24	Mono.Macr	STARD10
MYO6	4.4927e-28	-0.281904	0.134	0.362	9.50026e-24	Mono.Macr	MYO6
RND3.1	5.36011e-28	-0.397283	0.219	0.459	1.13345e-23	Mono.Macr	RND3
TNFRSF12A	5.62393e-28	-0.532281	0.284	0.506	1.18924e-23	Mono.Macr	TNFRSF12A
ANAPC16	6.39798e-28	-0.368813	0.595	0.8	1.35292e-23	Mono.Macr	ANAPC16
MZT2A.1	6.74875e-28	-0.399617	0.556	0.794	1.42709e-23	Mono.Macr	MZT2A
RBPMS	6.75653e-28	-0.311734	0.125	0.338	1.42874e-23	Mono.Macr	RBPMS
LIMCH1	7.42557e-28	-0.322735	0.113	0.324	1.57021e-23	Mono.Macr	LIMCH1
ICA1.1	8.1254e-28	-0.316292	0.144	0.369	1.7182e-23	Mono.Macr	ICA1
ZCRB1.1	8.4247e-28	-0.36555	0.408	0.661	1.78149e-23	Mono.Macr	ZCRB1
DAP	8.78705e-28	-0.324976	0.246	0.496	1.85811e-23	Mono.Macr	DAP
RPS27.1	9.73788e-28	-0.281673	1	1	2.05917e-23	Mono.Macr	RPS27
RPL13.1	9.76594e-28	-0.357303	1	1	2.06511e-23	Mono.Macr	RPL13
F11R.1	1.03131e-27	-0.318762	0.192	0.429	2.18081e-23	Mono.Macr	F11R
EBPL	1.04652e-27	-0.331304	0.305	0.559	2.21297e-23	Mono.Macr	EBPL
TBCA.1	1.14671e-27	-0.363868	0.733	0.912	2.42484e-23	Mono.Macr	TBCA
TMEM205.1	1.15086e-27	-0.377052	0.405	0.662	2.43361e-23	Mono.Macr	TMEM205
CALM2.1	1.17228e-27	0.354772	0.941	0.941	2.47891e-23	Mono.Macr	CALM2
RPL23.1	1.20101e-27	-0.295506	0.982	0.997	2.53967e-23	Mono.Macr	RPL23
RPL6.1	1.29211e-27	-0.442032	0.994	0.997	2.73229e-23	Mono.Macr	RPL6
FOSL1.1	1.4073e-27	-0.467446	0.197	0.422	2.97587e-23	Mono.Macr	FOSL1
IL20RA.1	1.5047e-27	-0.292271	0.092	0.294	3.18184e-23	Mono.Macr	IL20RA
STAP2.1	1.80395e-27	-0.328862	0.221	0.467	3.81463e-23	Mono.Macr	STAP2
SNRPN	2.20841e-27	-0.354212	0.324	0.576	4.66991e-23	Mono.Macr	SNRPN
MRPS26.1	2.63439e-27	-0.355725	0.312	0.566	5.57069e-23	Mono.Macr	MRPS26
TMPRSS4.1	2.79933e-27	-0.298662	0.131	0.349	5.91946e-23	Mono.Macr	TMPRSS4
UPK1B.1	2.91904e-27	-0.777165	0.167	0.366	6.17261e-23	Mono.Macr	UPK1B
TMEM30B.1	4.01942e-27	-0.299075	0.11	0.318	8.49946e-23	Mono.Macr	TMEM30B
IDH1.1	4.38849e-27	-0.410573	0.464	0.703	9.27991e-23	Mono.Macr	IDH1
RILPL2.1	4.39912e-27	0.655214	0.354	0.221	9.30238e-23	Mono.Macr	RILPL2
SH3YL1.1	5.09653e-27	-0.342352	0.351	0.611	1.07771e-22	Mono.Macr	SH3YL1
FERMT1.1	5.31267e-27	-0.286716	0.11	0.318	1.12342e-22	Mono.Macr	FERMT1
UGDH.1	5.39709e-27	-0.362593	0.201	0.435	1.14127e-22	Mono.Macr	UGDH
KRT13.1	5.87625e-27	-0.755835	0.467	0.659	1.24259e-22	Mono.Macr	KRT13
ZNRD1.1	7.08694e-27	-0.335737	0.266	0.513	1.4986e-22	Mono.Macr	ZNRD1
TRIM29	9.28087e-27	-0.296111	0.158	0.386	1.96253e-22	Mono.Macr	TRIM29
FOXA1.1	1.23941e-26	-0.32939	0.126	0.333	2.62087e-22	Mono.Macr	FOXA1
RPS10.1	1.24829e-26	-0.387814	0.907	0.959	2.63964e-22	Mono.Macr	RPS10
BMP2.1	1.24893e-26	-0.572152	0.143	0.345	2.64098e-22	Mono.Macr	BMP2
PADI3.1	1.3631e-26	-0.424585	0.164	0.378	2.88242e-22	Mono.Macr	PADI3
ATP6AP2.1	1.37921e-26	0.540773	0.613	0.52	2.91647e-22	Mono.Macr	ATP6AP2
RPS15A.1	1.54568e-26	-0.327976	1	1	3.2685e-22	Mono.Macr	RPS15A
CA12.1	1.60346e-26	-0.323077	0.141	0.355	3.39069e-22	Mono.Macr	CA12
C11orf1.1	2.0873e-26	-0.270056	0.147	0.367	4.4138e-22	Mono.Macr	C11orf1
ITGA3.1	3.23876e-26	-0.384356	0.162	0.376	6.84867e-22	Mono.Macr	ITGA3
S100A10.1	3.78482e-26	0.463992	0.842	0.739	8.00338e-22	Mono.Macr	S100A10
SLC44A3.1	4.03084e-26	-0.281703	0.108	0.312	8.52362e-22	Mono.Macr	SLC44A3
SNRPE.1	4.32413e-26	-0.301393	0.73	0.898	9.14381e-22	Mono.Macr	SNRPE
SLC25A4	4.64801e-26	-0.29196	0.107	0.305	9.82868e-22	Mono.Macr	SLC25A4
PSMB5	6.45962e-26	-0.326387	0.438	0.685	1.36595e-21	Mono.Macr	PSMB5
COX6A1.1	6.59618e-26	-0.345837	0.919	0.975	1.39483e-21	Mono.Macr	COX6A1
RDX.1	6.63506e-26	-0.502826	0.285	0.495	1.40305e-21	Mono.Macr	RDX
RPL27	7.3188e-26	-0.250904	0.994	0.997	1.54763e-21	Mono.Macr	RPL27
DPM3.1	7.33033e-26	-0.397215	0.294	0.523	1.55007e-21	Mono.Macr	DPM3
RPL38.1	7.74269e-26	-0.320166	0.989	0.997	1.63727e-21	Mono.Macr	RPL38
INPP1	8.31263e-26	-0.277982	0.09	0.282	1.75779e-21	Mono.Macr	INPP1
HSPB1.1	9.35717e-26	-0.444446	0.974	0.998	1.97867e-21	Mono.Macr	HSPB1
EFNB1	9.37905e-26	-0.336686	0.098	0.288	1.98329e-21	Mono.Macr	EFNB1
CLEC2B.1	9.69524e-26	0.499037	0.456	0.31	2.05016e-21	Mono.Macr	CLEC2B
LIMA1	1.06565e-25	-0.355103	0.228	0.466	2.25343e-21	Mono.Macr	LIMA1
GALNT1.1	1.22047e-25	-0.389344	0.273	0.509	2.58081e-21	Mono.Macr	GALNT1
HSPA1B.1	1.40124e-25	0.976223	0.769	0.734	2.96306e-21	Mono.Macr	HSPA1B
GCLC.1	1.46007e-25	-0.439099	0.165	0.379	3.08746e-21	Mono.Macr	GCLC
SERPINB1.1	1.67857e-25	0.556179	0.42	0.288	3.54951e-21	Mono.Macr	SERPINB1
TMA7.1	1.71328e-25	-0.342563	0.902	0.985	3.62291e-21	Mono.Macr	TMA7
ARL6IP5.1	1.73222e-25	0.590785	0.583	0.485	3.66295e-21	Mono.Macr	ARL6IP5
YBX3	1.78778e-25	-0.350566	0.523	0.761	3.78043e-21	Mono.Macr	YBX3
MRPL36	1.92324e-25	-0.362282	0.284	0.514	4.06689e-21	Mono.Macr	MRPL36
GTF2I.1	2.02002e-25	-0.307685	0.36	0.613	4.27154e-21	Mono.Macr	GTF2I
MSX2.1	2.3182e-25	-0.300539	0.122	0.327	4.90207e-21	Mono.Macr	MSX2
FAM127B	2.39714e-25	-0.286522	0.209	0.442	5.06899e-21	Mono.Macr	FAM127B
MRPL32	3.17819e-25	-0.309645	0.224	0.455	6.72061e-21	Mono.Macr	MRPL32
ASS1.1	3.31688e-25	-0.327967	0.102	0.294	7.01387e-21	Mono.Macr	ASS1
ATP1A4.1	3.36558e-25	-0.297722	0.089	0.278	7.11686e-21	Mono.Macr	ATP1A4
ALDH2.1	4.04931e-25	0.596514	0.341	0.21	8.56266e-21	Mono.Macr	ALDH2
KLF3.1	4.227e-25	-0.37404	0.314	0.557	8.93842e-21	Mono.Macr	KLF3
SRP9	4.69799e-25	-0.337559	0.641	0.844	9.93438e-21	Mono.Macr	SRP9
NFKB1.1	5.11958e-25	0.639529	0.323	0.197	1.08259e-20	Mono.Macr	NFKB1
DNAJC19	5.17732e-25	-0.29195	0.309	0.554	1.0948e-20	Mono.Macr	DNAJC19
DKK1.1	5.9388e-25	-0.514666	0.071	0.25	1.25582e-20	Mono.Macr	DKK1
IP6K2	5.98834e-25	-0.345056	0.297	0.528	1.2663e-20	Mono.Macr	IP6K2
LY6K.1	6.47453e-25	-0.345357	0.111	0.309	1.36911e-20	Mono.Macr	LY6K
PAWR	7.32847e-25	-0.253609	0.138	0.349	1.54968e-20	Mono.Macr	PAWR
GCSH	7.50804e-25	-0.276675	0.188	0.413	1.58765e-20	Mono.Macr	GCSH
MSMO1.1	8.54623e-25	-0.402199	0.2	0.415	1.80719e-20	Mono.Macr	MSMO1
RPL18	1.01736e-24	-0.259706	0.997	0.999	2.1513e-20	Mono.Macr	RPL18
ITM2B.1	1.03158e-24	0.464935	0.97	0.977	2.18138e-20	Mono.Macr	ITM2B
CUTA	1.03819e-24	-0.393116	0.709	0.861	2.19535e-20	Mono.Macr	CUTA
KLF4.1	1.11607e-24	0.801038	0.492	0.367	2.36005e-20	Mono.Macr	KLF4
LINC00511	1.35449e-24	-0.271242	0.086	0.271	2.8642e-20	Mono.Macr	LINC00511
GPRC5A.1	1.3883e-24	-0.529958	0.26	0.481	2.9357e-20	Mono.Macr	GPRC5A
UQCR10.1	1.40085e-24	-0.423695	0.893	0.976	2.96224e-20	Mono.Macr	UQCR10
ZNF593	1.40759e-24	-0.27271	0.362	0.619	2.97649e-20	Mono.Macr	ZNF593
DDAH2.1	1.42212e-24	0.427752	0.297	0.168	3.00722e-20	Mono.Macr	DDAH2
DPY30.1	1.49014e-24	-0.33432	0.432	0.67	3.15105e-20	Mono.Macr	DPY30
GSTM4.1	1.74572e-24	-0.430662	0.233	0.447	3.69149e-20	Mono.Macr	GSTM4
DDT.1	1.83387e-24	-0.452043	0.64	0.839	3.8779e-20	Mono.Macr	DDT
CAPNS2.1	1.90212e-24	-0.320011	0.128	0.33	4.02223e-20	Mono.Macr	CAPNS2
HMGCS2.1	1.92941e-24	-0.630621	0.266	0.469	4.07993e-20	Mono.Macr	HMGCS2
CAPN1.1	1.98504e-24	-0.337215	0.35	0.591	4.19757e-20	Mono.Macr	CAPN1
SNAI2	2.15474e-24	-0.403393	0.122	0.32	4.55641e-20	Mono.Macr	SNAI2
HSBP1L1	2.5724e-24	-0.3199	0.173	0.381	5.43959e-20	Mono.Macr	HSBP1L1
RNF39.1	2.67003e-24	-0.596232	0.12	0.307	5.64605e-20	Mono.Macr	RNF39
SPAG16.1	2.77108e-24	-0.292438	0.185	0.403	5.85972e-20	Mono.Macr	SPAG16
LMNA	3.37452e-24	-0.392556	0.695	0.897	7.13576e-20	Mono.Macr	LMNA
C7orf55	3.65636e-24	-0.29883	0.186	0.407	7.73174e-20	Mono.Macr	C7orf55
SNX31.1	4.12392e-24	-0.352552	0.114	0.307	8.72044e-20	Mono.Macr	SNX31
SLC25A6	4.15119e-24	-0.290934	0.899	0.973	8.7781e-20	Mono.Macr	SLC25A6
UBE2E3	5.54884e-24	-0.317411	0.383	0.622	1.17336e-19	Mono.Macr	UBE2E3
CNIH4	5.85634e-24	-0.286396	0.348	0.601	1.23838e-19	Mono.Macr	CNIH4
MCL1.1	6.12841e-24	0.560027	0.722	0.687	1.29591e-19	Mono.Macr	MCL1
ANXA4.1	6.79742e-24	-0.402916	0.32	0.557	1.43738e-19	Mono.Macr	ANXA4
CORO1C	7.15962e-24	0.417481	0.252	0.136	1.51397e-19	Mono.Macr	CORO1C
SH3BGRL.1	8.34228e-24	0.503836	0.634	0.591	1.76406e-19	Mono.Macr	SH3BGRL
GSTO2	9.34455e-24	-0.255862	0.108	0.299	1.976e-19	Mono.Macr	GSTO2
METTL9	1.01372e-23	-0.318202	0.332	0.565	2.14362e-19	Mono.Macr	METTL9
FAM63B	1.10537e-23	-0.253364	0.17	0.386	2.33742e-19	Mono.Macr	FAM63B
CD44.1	1.12366e-23	0.595995	0.48	0.355	2.37609e-19	Mono.Macr	CD44
OPTN	1.12567e-23	-0.261334	0.102	0.292	2.38034e-19	Mono.Macr	OPTN
FAM174B.1	1.33236e-23	-0.257416	0.137	0.338	2.81741e-19	Mono.Macr	FAM174B
IFNGR1.1	1.45368e-23	0.687793	0.482	0.38	3.07395e-19	Mono.Macr	IFNGR1
HS3ST1.1	1.99159e-23	-0.325716	0.17	0.372	4.21141e-19	Mono.Macr	HS3ST1
WASL	2.09231e-23	-0.285459	0.15	0.349	4.4244e-19	Mono.Macr	WASL
CFLAR.1	2.41522e-23	0.637379	0.417	0.305	5.10723e-19	Mono.Macr	CFLAR
RCN1.1	2.53182e-23	-0.463099	0.285	0.515	5.35378e-19	Mono.Macr	RCN1
AREG.1	2.55086e-23	1.19474	0.473	0.338	5.39405e-19	Mono.Macr	AREG
ERBB3.1	2.9743e-23	-0.313548	0.167	0.369	6.28946e-19	Mono.Macr	ERBB3
SPINT1.1	3.52237e-23	-0.339938	0.329	0.553	7.44841e-19	Mono.Macr	SPINT1
GATA3-AS1.1	3.75263e-23	-0.27441	0.08	0.253	7.9353e-19	Mono.Macr	GATA3-AS1
GLUL.1	4.26805e-23	0.762052	0.764	0.75	9.02521e-19	Mono.Macr	GLUL
STRA13.1	4.28345e-23	-0.462843	0.383	0.608	9.05779e-19	Mono.Macr	STRA13
RAB11A.1	4.53546e-23	-0.326803	0.595	0.814	9.59069e-19	Mono.Macr	RAB11A
CNPY2	5.18419e-23	-0.344937	0.426	0.66	1.09625e-18	Mono.Macr	CNPY2
PTOV1	5.44852e-23	-0.286723	0.203	0.416	1.15214e-18	Mono.Macr	PTOV1
ECHDC2	5.93662e-23	-0.268822	0.153	0.353	1.25536e-18	Mono.Macr	ECHDC2
C1orf186	6.13262e-23	-0.27108	0.092	0.269	1.2968e-18	Mono.Macr	C1orf186
BEX2.1	6.61029e-23	-0.260075	0.138	0.336	1.39781e-18	Mono.Macr	BEX2
RPSA	6.6353e-23	-0.253721	0.979	0.991	1.4031e-18	Mono.Macr	RPSA
RPL5	6.87964e-23	-0.366899	0.973	0.988	1.45477e-18	Mono.Macr	RPL5
PAIP1	7.03363e-23	-0.261176	0.177	0.389	1.48733e-18	Mono.Macr	PAIP1
COA3	7.24968e-23	-0.321027	0.384	0.618	1.53302e-18	Mono.Macr	COA3
ZNF626.1	7.49696e-23	-0.302589	0.165	0.371	1.58531e-18	Mono.Macr	ZNF626
SMIM14	7.53554e-23	-0.270884	0.269	0.504	1.59346e-18	Mono.Macr	SMIM14
PRSS22.1	8.09217e-23	-0.468339	0.192	0.384	1.71117e-18	Mono.Macr	PRSS22
AP1S1	8.11436e-23	-0.313262	0.341	0.562	1.71586e-18	Mono.Macr	AP1S1
TMC4	8.41987e-23	-0.2554	0.123	0.313	1.78047e-18	Mono.Macr	TMC4
FAM105A	1.17598e-22	0.435475	0.257	0.141	2.48674e-18	Mono.Macr	FAM105A
HSBP1.1	1.23142e-22	-0.295528	0.715	0.889	2.60395e-18	Mono.Macr	HSBP1
ERGIC3.1	1.27955e-22	-0.319028	0.611	0.822	2.70574e-18	Mono.Macr	ERGIC3
CREG1	1.29505e-22	0.526914	0.56	0.47	2.73852e-18	Mono.Macr	CREG1
AKR1B10.1	1.45474e-22	-0.509357	0.087	0.254	3.0762e-18	Mono.Macr	AKR1B10
PHLDA2.1	1.54308e-22	-0.869705	0.733	0.848	3.263e-18	Mono.Macr	PHLDA2
ERBB2	1.60882e-22	-0.28429	0.125	0.311	3.40201e-18	Mono.Macr	ERBB2
APOA1BP	1.65088e-22	-0.283241	0.314	0.55	3.49095e-18	Mono.Macr	APOA1BP
SLPI.1	1.89592e-22	-0.541263	0.45	0.687	4.00911e-18	Mono.Macr	SLPI
NDUFA5	2.2183e-22	-0.311907	0.408	0.649	4.69081e-18	Mono.Macr	NDUFA5
APP	2.37179e-22	-0.272556	0.222	0.444	5.01539e-18	Mono.Macr	APP
UBL5	2.39073e-22	-0.271862	0.92	0.98	5.05544e-18	Mono.Macr	UBL5
RPL4.1	2.39494e-22	-0.336493	0.97	0.984	5.06434e-18	Mono.Macr	RPL4
MMP24-AS1.1	2.43024e-22	-0.369581	0.347	0.562	5.13899e-18	Mono.Macr	MMP24-AS1
SEPW1	2.65759e-22	-0.318979	0.658	0.855	5.61974e-18	Mono.Macr	SEPW1
NDUFB9	3.17956e-22	-0.306157	0.643	0.835	6.72349e-18	Mono.Macr	NDUFB9
C17orf89.1	3.21734e-22	-0.360096	0.443	0.665	6.80339e-18	Mono.Macr	C17orf89
MIR4458HG.1	3.32711e-22	-0.386712	0.168	0.359	7.03551e-18	Mono.Macr	MIR4458HG
GCLM	3.51427e-22	-0.271867	0.087	0.258	7.43127e-18	Mono.Macr	GCLM
NHP2.1	3.65433e-22	-0.319352	0.569	0.791	7.72745e-18	Mono.Macr	NHP2
TRIM31.1	3.7231e-22	-0.58036	0.129	0.312	7.87286e-18	Mono.Macr	TRIM31
CHMP2B.1	3.84886e-22	-0.320741	0.321	0.541	8.1388e-18	Mono.Macr	CHMP2B
ISYNA1	4.71272e-22	-0.29628	0.149	0.34	9.96551e-18	Mono.Macr	ISYNA1
TRMT112	5.48859e-22	-0.309301	0.773	0.903	1.16062e-17	Mono.Macr	TRMT112
MARCKSL1	6.52542e-22	-0.33109	0.408	0.634	1.37987e-17	Mono.Macr	MARCKSL1
SLC39A6	8.23437e-22	-0.270993	0.195	0.402	1.74124e-17	Mono.Macr	SLC39A6
MPST	8.40931e-22	-0.297923	0.339	0.572	1.77823e-17	Mono.Macr	MPST
RAB38.1	8.43246e-22	-0.259151	0.147	0.343	1.78313e-17	Mono.Macr	RAB38
SKP1	8.87846e-22	-0.280587	0.865	0.961	1.87744e-17	Mono.Macr	SKP1
ALDH1L1	1.04226e-21	-0.266567	0.09	0.262	2.20396e-17	Mono.Macr	ALDH1L1
CYB5R1.1	1.2019e-21	-0.327148	0.276	0.491	2.54153e-17	Mono.Macr	CYB5R1
FDFT1.1	2.059e-21	-0.337189	0.354	0.588	4.35396e-17	Mono.Macr	FDFT1
RAB4A	2.25137e-21	-0.275746	0.356	0.6	4.76075e-17	Mono.Macr	RAB4A
LINC00657	2.55855e-21	-0.270624	0.314	0.541	5.41031e-17	Mono.Macr	LINC00657
VGLL1.1	2.62893e-21	-0.287552	0.117	0.298	5.55913e-17	Mono.Macr	VGLL1
RNF11	2.95337e-21	-0.271121	0.263	0.484	6.24519e-17	Mono.Macr	RNF11
SLC16A3.1	2.95734e-21	0.622464	0.486	0.377	6.25358e-17	Mono.Macr	SLC16A3
MAPK13.1	2.99237e-21	-0.257926	0.152	0.346	6.32768e-17	Mono.Macr	MAPK13
IL18	3.079e-21	0.424106	0.326	0.204	6.51084e-17	Mono.Macr	IL18
NR2F6	3.2218e-21	-0.260485	0.098	0.268	6.81282e-17	Mono.Macr	NR2F6
IMMP1L	3.56299e-21	-0.263589	0.125	0.308	7.5343e-17	Mono.Macr	IMMP1L
TMEM59	3.58951e-21	-0.331462	0.797	0.918	7.59038e-17	Mono.Macr	TMEM59
TRAK1	3.59831e-21	-0.291765	0.135	0.315	7.60899e-17	Mono.Macr	TRAK1
PGRMC1	3.74313e-21	-0.295427	0.306	0.53	7.91523e-17	Mono.Macr	PGRMC1
FAM200B	3.7954e-21	-0.252921	0.257	0.475	8.02576e-17	Mono.Macr	FAM200B
ZFP36.1	3.94606e-21	0.507203	0.848	0.79	8.34434e-17	Mono.Macr	ZFP36
RAB40B	4.78008e-21	-0.27608	0.131	0.309	1.01079e-16	Mono.Macr	RAB40B
CNPY3.1	5.67557e-21	0.590485	0.429	0.328	1.20016e-16	Mono.Macr	CNPY3
CRIP2	6.04391e-21	-0.352246	0.192	0.382	1.27805e-16	Mono.Macr	CRIP2
GOT2	6.91654e-21	-0.256988	0.18	0.376	1.46257e-16	Mono.Macr	GOT2
TIMM13.1	7.01765e-21	-0.298039	0.583	0.802	1.48395e-16	Mono.Macr	TIMM13
BTG1.1	7.2389e-21	0.509908	0.881	0.831	1.53074e-16	Mono.Macr	BTG1
LIPH.1	8.72323e-21	-0.399198	0.168	0.358	1.84461e-16	Mono.Macr	LIPH
TOMM20	9.02704e-21	-0.265296	0.488	0.712	1.90886e-16	Mono.Macr	TOMM20
ALDOA.1	1.083e-20	-0.387914	0.913	0.964	2.29011e-16	Mono.Macr	ALDOA
IFT20	1.09762e-20	-0.297359	0.294	0.505	2.32103e-16	Mono.Macr	IFT20
SRPK1	1.1693e-20	-0.259954	0.173	0.364	2.47261e-16	Mono.Macr	SRPK1
SPTBN1	1.1879e-20	-0.262617	0.126	0.302	2.51193e-16	Mono.Macr	SPTBN1
PCP4L1.1	1.29044e-20	-0.264291	0.161	0.357	2.72876e-16	Mono.Macr	PCP4L1
ERP27.1	1.29787e-20	-0.263356	0.137	0.319	2.74449e-16	Mono.Macr	ERP27
GLO1.1	1.39202e-20	-0.386743	0.311	0.519	2.94356e-16	Mono.Macr	GLO1
ST3GAL4.1	1.46807e-20	-0.357966	0.192	0.378	3.10438e-16	Mono.Macr	ST3GAL4
TMEM141.1	1.48863e-20	-0.363763	0.308	0.52	3.14786e-16	Mono.Macr	TMEM141
C14orf1	1.68167e-20	-0.265293	0.275	0.483	3.55606e-16	Mono.Macr	C14orf1
PRELID3B.1	2.1325e-20	-0.275948	0.279	0.497	4.50939e-16	Mono.Macr	PRELID3B
FABP4.1	2.15913e-20	-0.860971	0.17	0.342	4.5657e-16	Mono.Macr	FABP4
ANXA1.1	2.70526e-20	0.398002	0.655	0.535	5.72054e-16	Mono.Macr	ANXA1
NME1	2.73406e-20	-0.312162	0.435	0.677	5.78145e-16	Mono.Macr	NME1
ALKBH7	2.92593e-20	-0.284696	0.461	0.697	6.18717e-16	Mono.Macr	ALKBH7
QKI	3.00408e-20	0.399219	0.264	0.153	6.35242e-16	Mono.Macr	QKI
HSP90AA1.1	3.07208e-20	0.648467	0.983	0.985	6.49622e-16	Mono.Macr	HSP90AA1
POLR1D.1	3.08435e-20	-0.311741	0.536	0.759	6.52217e-16	Mono.Macr	POLR1D
NET1	4.04447e-20	-0.268787	0.249	0.464	8.55243e-16	Mono.Macr	NET1
PRDM1.1	4.32558e-20	0.533102	0.27	0.155	9.14688e-16	Mono.Macr	PRDM1
PLA2G2F.1	4.62366e-20	-0.340252	0.147	0.32	9.77718e-16	Mono.Macr	PLA2G2F
CDH1.1	4.82449e-20	-0.297644	0.216	0.416	1.02019e-15	Mono.Macr	CDH1
CHCHD2	4.98404e-20	-0.301567	0.896	0.966	1.05392e-15	Mono.Macr	CHCHD2
PTP4A2.1	4.99042e-20	-0.309556	0.547	0.769	1.05527e-15	Mono.Macr	PTP4A2
BAMBI	5.73195e-20	-0.346371	0.116	0.283	1.21208e-15	Mono.Macr	BAMBI
LMO7	5.78592e-20	-0.28451	0.123	0.295	1.22349e-15	Mono.Macr	LMO7
EIF2S2	5.78884e-20	-0.300024	0.628	0.833	1.22411e-15	Mono.Macr	EIF2S2
RNF19A	5.87502e-20	-0.284202	0.179	0.367	1.24233e-15	Mono.Macr	RNF19A
USMG5	6.04823e-20	-0.27541	0.782	0.914	1.27896e-15	Mono.Macr	USMG5
NDUFB10	6.09989e-20	-0.341635	0.649	0.824	1.28988e-15	Mono.Macr	NDUFB10
HOTAIRM1.1	6.22883e-20	-0.321001	0.225	0.423	1.31715e-15	Mono.Macr	HOTAIRM1
RAB20	6.56647e-20	0.532372	0.267	0.162	1.38855e-15	Mono.Macr	RAB20
RAP1A.1	6.57561e-20	0.493995	0.468	0.38	1.39048e-15	Mono.Macr	RAP1A
GNB2L1	6.62929e-20	-0.391106	0.992	0.993	1.40183e-15	Mono.Macr	GNB2L1
LYPLA1.1	6.80368e-20	-0.296087	0.526	0.765	1.43871e-15	Mono.Macr	LYPLA1
PLTP	7.11808e-20	0.670309	0.263	0.155	1.50519e-15	Mono.Macr	PLTP
ASPH	8.26024e-20	-0.261871	0.303	0.532	1.74671e-15	Mono.Macr	ASPH
PIM1.1	8.57843e-20	-0.395171	0.267	0.468	1.814e-15	Mono.Macr	PIM1
ATP6V0B	9.65664e-20	0.399402	0.79	0.767	2.04199e-15	Mono.Macr	ATP6V0B
TMEM40.1	1.14723e-19	-0.274331	0.198	0.39	2.42593e-15	Mono.Macr	TMEM40
PHF14	1.14863e-19	-0.271159	0.246	0.454	2.42889e-15	Mono.Macr	PHF14
COX6C.1	1.14941e-19	-0.347052	0.926	0.978	2.43055e-15	Mono.Macr	COX6C
RPL34.1	1.24351e-19	-0.307129	1	1	2.62953e-15	Mono.Macr	RPL34
RAB2A	1.25271e-19	-0.268951	0.517	0.751	2.64899e-15	Mono.Macr	RAB2A
NDRG1.1	1.38691e-19	-0.526327	0.212	0.392	2.93277e-15	Mono.Macr	NDRG1
PEA15.1	1.50347e-19	0.513299	0.384	0.272	3.17925e-15	Mono.Macr	PEA15
NDUFC2	1.59288e-19	-0.308392	0.617	0.804	3.36831e-15	Mono.Macr	NDUFC2
MMP28.1	1.60726e-19	-0.30287	0.095	0.251	3.39871e-15	Mono.Macr	MMP28
ARPC4.1	1.66733e-19	0.428252	0.589	0.511	3.52574e-15	Mono.Macr	ARPC4
NFKBIZ.1	1.73067e-19	0.596579	0.389	0.278	3.65967e-15	Mono.Macr	NFKBIZ
SQLE.1	2.07135e-19	-0.277797	0.186	0.377	4.38008e-15	Mono.Macr	SQLE
TM4SF1	2.44081e-19	-0.389562	0.161	0.338	5.16134e-15	Mono.Macr	TM4SF1
COA4	2.44367e-19	-0.252943	0.303	0.517	5.16738e-15	Mono.Macr	COA4
PYCARD	2.64226e-19	0.522127	0.677	0.656	5.58733e-15	Mono.Macr	PYCARD
PLSCR1.1	3.00664e-19	0.479832	0.52	0.435	6.35783e-15	Mono.Macr	PLSCR1
MRPL42	3.14453e-19	-0.262455	0.317	0.544	6.64942e-15	Mono.Macr	MRPL42
DYNLT1	3.15186e-19	-0.277055	0.602	0.798	6.66492e-15	Mono.Macr	DYNLT1
TMEM106C	3.53296e-19	-0.266911	0.174	0.357	7.4708e-15	Mono.Macr	TMEM106C
PNPLA2	3.89707e-19	-0.251685	0.215	0.415	8.24074e-15	Mono.Macr	PNPLA2
PFDN4	3.91065e-19	-0.252475	0.393	0.636	8.26947e-15	Mono.Macr	PFDN4
HSPA6.1	4.22505e-19	1.07214	0.312	0.194	8.93429e-15	Mono.Macr	HSPA6
SNRPF.1	5.4004e-19	-0.314928	0.625	0.824	1.14197e-14	Mono.Macr	SNRPF
NBEAL1.1	5.47172e-19	-0.430391	0.479	0.653	1.15705e-14	Mono.Macr	NBEAL1
IMPDH2	5.58421e-19	-0.280692	0.35	0.567	1.18084e-14	Mono.Macr	IMPDH2
LAMTOR5	6.65401e-19	-0.303975	0.68	0.863	1.40706e-14	Mono.Macr	LAMTOR5
CISD3.1	8.60243e-19	-0.372901	0.414	0.6	1.81907e-14	Mono.Macr	CISD3
CLDN23.1	8.71302e-19	-0.297999	0.123	0.286	1.84245e-14	Mono.Macr	CLDN23
TSPAN1.1	1.01318e-18	-0.301103	0.219	0.412	2.14248e-14	Mono.Macr	TSPAN1
YPEL3	1.09877e-18	-0.299672	0.219	0.401	2.32346e-14	Mono.Macr	YPEL3
SQSTM1.1	1.13177e-18	-0.466497	0.656	0.814	2.39324e-14	Mono.Macr	SQSTM1
ATP1B3.1	1.18422e-18	0.586019	0.602	0.565	2.50415e-14	Mono.Macr	ATP1B3
CTSA.1	1.29184e-18	0.536445	0.485	0.392	2.73173e-14	Mono.Macr	CTSA
ZFAND5.1	1.30833e-18	0.881992	0.587	0.563	2.7666e-14	Mono.Macr	ZFAND5
C20orf24.1	1.35391e-18	-0.263559	0.396	0.618	2.86297e-14	Mono.Macr	C20orf24
ATP5G1	1.53233e-18	-0.315481	0.542	0.756	3.24027e-14	Mono.Macr	ATP5G1
COX7A2L	1.82259e-18	-0.268852	0.56	0.776	3.85405e-14	Mono.Macr	COX7A2L
TMEM50B.1	2.65511e-18	-0.281325	0.353	0.568	5.6145e-14	Mono.Macr	TMEM50B
PTN.1	2.96895e-18	-0.926153	0.12	0.27	6.27815e-14	Mono.Macr	PTN
LAP3.1	3.14319e-18	0.569355	0.332	0.231	6.64659e-14	Mono.Macr	LAP3
ATP5I.1	3.58557e-18	-0.29185	0.853	0.964	7.58204e-14	Mono.Macr	ATP5I
MPC2	4.22392e-18	-0.268621	0.458	0.667	8.9319e-14	Mono.Macr	MPC2
CITED4	4.30193e-18	-0.405864	0.116	0.268	9.09686e-14	Mono.Macr	CITED4
GDF15.1	5.03126e-18	-0.912269	0.554	0.65	1.06391e-13	Mono.Macr	GDF15
TUBA4A	6.26835e-18	-0.259106	0.152	0.322	1.32551e-13	Mono.Macr	TUBA4A
CBR1	6.34738e-18	-0.259485	0.267	0.462	1.34222e-13	Mono.Macr	CBR1
SRSF9.1	6.76539e-18	-0.317065	0.547	0.737	1.43061e-13	Mono.Macr	SRSF9
LINC01420	7.67855e-18	-0.294723	0.518	0.723	1.62371e-13	Mono.Macr	LINC01420
DYNLL1	7.71324e-18	-0.268918	0.919	0.97	1.63104e-13	Mono.Macr	DYNLL1
SMIM5.1	9.25783e-18	-0.293771	0.143	0.307	1.95766e-13	Mono.Macr	SMIM5
MTHFD2	9.33073e-18	0.388006	0.257	0.153	1.97308e-13	Mono.Macr	MTHFD2
VOPP1.1	1.02895e-17	0.398567	0.27	0.169	2.17582e-13	Mono.Macr	VOPP1
CYP3A5.1	1.03382e-17	-0.313405	0.132	0.294	2.18611e-13	Mono.Macr	CYP3A5
RHOV.1	1.43431e-17	-0.334187	0.276	0.469	3.03298e-13	Mono.Macr	RHOV
SCAMP2.1	1.60981e-17	0.421699	0.305	0.204	3.4041e-13	Mono.Macr	SCAMP2
HEXA.1	1.68827e-17	0.496992	0.356	0.257	3.57001e-13	Mono.Macr	HEXA
CD46	1.70718e-17	-0.250096	0.369	0.585	3.61001e-13	Mono.Macr	CD46
COX14.1	1.95902e-17	-0.382151	0.593	0.784	4.14254e-13	Mono.Macr	COX14
TMEM147.1	2.30948e-17	-0.363716	0.599	0.773	4.88364e-13	Mono.Macr	TMEM147
HMGB2.1	2.6595e-17	0.768507	0.48	0.392	5.62378e-13	Mono.Macr	HMGB2
IFI27.1	3.21611e-17	-0.713017	0.773	0.848	6.80079e-13	Mono.Macr	IFI27
IFITM3.1	3.22469e-17	0.901073	0.676	0.644	6.81893e-13	Mono.Macr	IFITM3
POLR2K.1	3.80283e-17	-0.369673	0.536	0.739	8.04147e-13	Mono.Macr	POLR2K
C9orf16	4.13079e-17	-0.345525	0.664	0.807	8.73496e-13	Mono.Macr	C9orf16
PARK7	4.27938e-17	-0.291557	0.734	0.854	9.04917e-13	Mono.Macr	PARK7
TPM3.1	4.67522e-17	0.453112	0.65	0.637	9.88623e-13	Mono.Macr	TPM3
SNRPD1	6.56042e-17	-0.308228	0.608	0.789	1.38727e-12	Mono.Macr	SNRPD1
PSME2.1	7.00947e-17	0.516966	0.713	0.713	1.48222e-12	Mono.Macr	PSME2
CYSTM1.1	7.19683e-17	-0.394298	0.471	0.652	1.52184e-12	Mono.Macr	CYSTM1
TPM1.1	7.58867e-17	-0.25572	0.212	0.399	1.6047e-12	Mono.Macr	TPM1
LY6D.1	8.21145e-17	-0.71754	0.417	0.571	1.73639e-12	Mono.Macr	LY6D
ACOX1.1	8.85914e-17	-0.279331	0.21	0.39	1.87335e-12	Mono.Macr	ACOX1
CDK4.1	9.77293e-17	-0.305175	0.381	0.588	2.06658e-12	Mono.Macr	CDK4
GGCT.1	1.10163e-16	-0.261576	0.339	0.547	2.3295e-12	Mono.Macr	GGCT
CRABP2.1	1.17222e-16	-0.477041	0.402	0.572	2.47877e-12	Mono.Macr	CRABP2
UQCR11.1	1.35039e-16	-0.257959	0.926	0.982	2.85554e-12	Mono.Macr	UQCR11
PPP1R14B.1	1.43763e-16	-0.309863	0.374	0.564	3.04e-12	Mono.Macr	PPP1R14B
MLF2	2.0819e-16	-0.269136	0.444	0.649	4.40238e-12	Mono.Macr	MLF2
RAB32.1	2.15402e-16	0.476617	0.36	0.263	4.55489e-12	Mono.Macr	RAB32
TMBIM1	2.40606e-16	-0.281916	0.266	0.453	5.08786e-12	Mono.Macr	TMBIM1
ATP6V0D1.1	2.93432e-16	0.480926	0.44	0.363	6.20491e-12	Mono.Macr	ATP6V0D1
DNAJB1.1	3.27899e-16	0.77611	0.812	0.786	6.93374e-12	Mono.Macr	DNAJB1
CD55.1	3.50787e-16	-0.335138	0.351	0.536	7.41774e-12	Mono.Macr	CD55
PTGES	3.53985e-16	-0.25319	0.114	0.258	7.48537e-12	Mono.Macr	PTGES
CALM1.1	3.86341e-16	0.376563	0.841	0.859	8.16956e-12	Mono.Macr	CALM1
VAMP8	4.06637e-16	0.331461	0.868	0.891	8.59874e-12	Mono.Macr	VAMP8
DGUOK	5.02706e-16	-0.268265	0.464	0.667	1.06302e-11	Mono.Macr	DGUOK
TAX1BP3	5.15373e-16	-0.281425	0.356	0.552	1.08981e-11	Mono.Macr	TAX1BP3
TNFAIP2.1	5.36201e-16	-0.29093	0.363	0.557	1.13385e-11	Mono.Macr	TNFAIP2
MBNL1.1	5.52416e-16	0.432073	0.312	0.215	1.16814e-11	Mono.Macr	MBNL1
BPGM.1	6.3187e-16	-0.455772	0.183	0.339	1.33615e-11	Mono.Macr	BPGM
HEXB.1	9.13808e-16	0.466995	0.452	0.37	1.93234e-11	Mono.Macr	HEXB
PPIA	9.22375e-16	-0.28627	0.962	0.986	1.95045e-11	Mono.Macr	PPIA
EGLN3.1	9.4701e-16	-0.291679	0.126	0.272	2.00255e-11	Mono.Macr	EGLN3
LGALS9.1	1.1143e-15	0.494065	0.417	0.325	2.3563e-11	Mono.Macr	LGALS9
NTAN1	1.2476e-15	-0.289823	0.233	0.396	2.63817e-11	Mono.Macr	NTAN1
FO538757.2.1	1.40456e-15	-0.305775	0.219	0.376	2.97008e-11	Mono.Macr	FO538757.2
C3orf14.1	1.91512e-15	-0.251264	0.174	0.329	4.04972e-11	Mono.Macr	C3orf14
RPL9	2.07325e-15	-0.263169	0.995	0.998	4.38408e-11	Mono.Macr	RPL9
ABHD11.1	2.64142e-15	-0.260739	0.206	0.377	5.58555e-11	Mono.Macr	ABHD11
REL	3.00926e-15	0.602292	0.589	0.576	6.36339e-11	Mono.Macr	REL
SNHG25.1	3.17305e-15	-0.355099	0.267	0.446	6.70973e-11	Mono.Macr	SNHG25
IDI1.1	3.47164e-15	-0.487405	0.33	0.495	7.34112e-11	Mono.Macr	IDI1
ODC1.1	5.35665e-15	-0.379311	0.164	0.305	1.13272e-10	Mono.Macr	ODC1
VMP1.1	5.48428e-15	-0.305589	0.56	0.754	1.15971e-10	Mono.Macr	VMP1
GLTSCR2	1.24329e-14	-0.302508	0.692	0.822	2.62906e-10	Mono.Macr	GLTSCR2
IER5.1	1.2545e-14	0.52259	0.453	0.36	2.65277e-10	Mono.Macr	IER5
UBXN4	1.31426e-14	-0.256296	0.483	0.68	2.77913e-10	Mono.Macr	UBXN4
RSL1D1	1.47494e-14	-0.255337	0.435	0.628	3.11892e-10	Mono.Macr	RSL1D1
EEF2	1.49688e-14	-0.381804	0.85	0.914	3.1653e-10	Mono.Macr	EEF2
CAST.1	1.57505e-14	-0.259752	0.521	0.711	3.3306e-10	Mono.Macr	CAST
VAMP5.1	2.01621e-14	0.508835	0.323	0.224	4.26347e-10	Mono.Macr	VAMP5
DRAP1.1	2.28689e-14	0.379746	0.71	0.713	4.83585e-10	Mono.Macr	DRAP1
AVPI1.1	3.06832e-14	-0.368961	0.348	0.509	6.48827e-10	Mono.Macr	AVPI1
UCP2	3.51188e-14	0.489325	0.426	0.352	7.42623e-10	Mono.Macr	UCP2
CLIC1.1	4.72611e-14	0.261923	0.898	0.916	9.99383e-10	Mono.Macr	CLIC1
NCOA7.1	4.9351e-14	-0.357855	0.236	0.397	1.04358e-09	Mono.Macr	NCOA7
ATP6V0E1.1	7.04357e-14	0.285152	0.866	0.899	1.48943e-09	Mono.Macr	ATP6V0E1
AKAP13.1	7.21373e-14	0.44815	0.339	0.251	1.52542e-09	Mono.Macr	AKAP13
STK17B	9.12876e-14	0.350477	0.273	0.179	1.93037e-09	Mono.Macr	STK17B
AKR1B1	9.79685e-14	0.330928	0.502	0.427	2.07164e-09	Mono.Macr	AKR1B1
RPS19BP1	9.94885e-14	-0.281546	0.488	0.658	2.10378e-09	Mono.Macr	RPS19BP1
NDUFA4	1.03337e-13	-0.284762	0.931	0.979	2.18516e-09	Mono.Macr	NDUFA4
PHB	1.08395e-13	-0.264846	0.462	0.655	2.29211e-09	Mono.Macr	PHB
DPP7.1	1.25225e-13	0.434492	0.486	0.429	2.64801e-09	Mono.Macr	DPP7
ANGPTL4	1.3127e-13	-0.257551	0.122	0.255	2.77584e-09	Mono.Macr	ANGPTL4
CCDC34	1.38992e-13	-0.254731	0.122	0.251	2.93912e-09	Mono.Macr	CCDC34
HSPA8.1	1.54637e-13	0.404054	0.842	0.852	3.26996e-09	Mono.Macr	HSPA8
TSPAN8.1	1.58734e-13	-0.264599	0.149	0.293	3.35658e-09	Mono.Macr	TSPAN8
RAB34	2.18462e-13	-0.260639	0.234	0.39	4.61961e-09	Mono.Macr	RAB34
ZYX.1	2.98086e-13	0.445078	0.299	0.214	6.30332e-09	Mono.Macr	ZYX
CALR	3.01853e-13	0.290783	0.785	0.781	6.38298e-09	Mono.Macr	CALR
TGFB1.1	3.37501e-13	0.321821	0.263	0.174	7.1368e-09	Mono.Macr	TGFB1
HMGCS1.1	3.52431e-13	-0.271721	0.221	0.373	7.45251e-09	Mono.Macr	HMGCS1
CKB.1	4.75004e-13	-0.5514	0.299	0.461	1.00444e-08	Mono.Macr	CKB
ERO1A.1	5.67827e-13	-0.277092	0.225	0.381	1.20073e-08	Mono.Macr	ERO1A
LEAP2.1	6.92913e-13	-0.630635	0.134	0.254	1.46523e-08	Mono.Macr	LEAP2
TNFAIP8	7.86755e-13	0.434757	0.251	0.168	1.66367e-08	Mono.Macr	TNFAIP8
RPL36A.1	9.11386e-13	-0.362949	0.883	0.916	1.92722e-08	Mono.Macr	RPL36A
SEPP1.1	9.3336e-13	0.538883	0.302	0.503	1.97368e-08	Mono.Macr	SEPP1
RPL17.1	1.00808e-12	-0.28638	0.568	0.716	2.13169e-08	Mono.Macr	RPL17
DNAJA1.1	1.27706e-12	0.54581	0.68	0.669	2.70046e-08	Mono.Macr	DNAJA1
TWSG1	1.87575e-12	-0.331523	0.155	0.283	3.96645e-08	Mono.Macr	TWSG1
HSPH1.1	2.3098e-12	0.635297	0.548	0.523	4.88431e-08	Mono.Macr	HSPH1
EEF1A1	2.59028e-12	-0.438077	0.998	0.999	5.4774e-08	Mono.Macr	EEF1A1
IER3	2.73178e-12	0.544477	0.778	0.749	5.77662e-08	Mono.Macr	IER3
MOB1A	3.17014e-12	0.411366	0.517	0.489	6.70358e-08	Mono.Macr	MOB1A
YWHAZ.1	3.73637e-12	-0.401352	0.742	0.878	7.90093e-08	Mono.Macr	YWHAZ
SLC20A1.1	4.29906e-12	-0.329988	0.398	0.553	9.09079e-08	Mono.Macr	SLC20A1
ATP6V1F	6.48384e-12	0.362663	0.817	0.85	1.37107e-07	Mono.Macr	ATP6V1F
DNMT1	6.86053e-12	0.300818	0.254	0.169	1.45073e-07	Mono.Macr	DNMT1
ERP44.1	9.05545e-12	0.420609	0.342	0.271	1.91486e-07	Mono.Macr	ERP44
NDUFS6	1.38879e-11	-0.280913	0.68	0.832	2.93674e-07	Mono.Macr	NDUFS6
UPK2.1	1.55158e-11	-0.618786	0.212	0.338	3.28097e-07	Mono.Macr	UPK2
EIF1	2.43351e-11	-0.342025	0.989	0.991	5.14589e-07	Mono.Macr	EIF1
SNX2	2.55888e-11	0.394465	0.35	0.286	5.41101e-07	Mono.Macr	SNX2
ACTR2	3.26294e-11	0.371774	0.532	0.501	6.89981e-07	Mono.Macr	ACTR2
ZC3H12A.1	3.31585e-11	-0.325547	0.312	0.457	7.01169e-07	Mono.Macr	ZC3H12A
RPS3A	3.77709e-11	-0.339945	0.997	0.998	7.98704e-07	Mono.Macr	RPS3A
IFNGR2.1	3.78219e-11	0.406674	0.488	0.446	7.99782e-07	Mono.Macr	IFNGR2
VMA21	5.63881e-11	0.334755	0.333	0.259	1.19238e-06	Mono.Macr	VMA21
TAOK3	7.47831e-11	0.39373	0.374	0.308	1.58136e-06	Mono.Macr	TAOK3
CCDC107.1	1.26001e-10	0.36922	0.284	0.208	2.66443e-06	Mono.Macr	CCDC107
RIPK2	2.03859e-10	0.364555	0.257	0.181	4.31081e-06	Mono.Macr	RIPK2
CALM3.1	2.51538e-10	0.440582	0.551	0.533	5.31901e-06	Mono.Macr	CALM3
SARAF	3.50736e-10	0.295529	0.746	0.75	7.41665e-06	Mono.Macr	SARAF
PLAU.1	3.64815e-10	0.364098	0.318	0.233	7.71438e-06	Mono.Macr	PLAU
HSP90B1.1	3.74706e-10	0.332198	0.688	0.707	7.92353e-06	Mono.Macr	HSP90B1
TRA2B.1	4.31317e-10	0.411109	0.595	0.578	9.12063e-06	Mono.Macr	TRA2B
S100A14.1	4.92495e-10	-0.312815	0.366	0.501	1.04143e-05	Mono.Macr	S100A14
CLTA.1	5.44612e-10	0.299265	0.686	0.712	1.15164e-05	Mono.Macr	CLTA
JUN.1	5.80756e-10	0.378525	0.82	0.796	1.22807e-05	Mono.Macr	JUN
HIST1H1C.1	6.6657e-10	-0.347585	0.182	0.296	1.40953e-05	Mono.Macr	HIST1H1C
HMGA1.1	6.81935e-10	-0.271234	0.459	0.608	1.44202e-05	Mono.Macr	HMGA1
FOS.1	7.04984e-10	0.307991	0.914	0.872	1.49076e-05	Mono.Macr	FOS
LMO4	7.67294e-10	-0.274691	0.336	0.476	1.62252e-05	Mono.Macr	LMO4
SQRDL	8.42459e-10	0.340087	0.269	0.198	1.78146e-05	Mono.Macr	SQRDL
SOCS3.1	9.85124e-10	0.461372	0.438	0.373	2.08314e-05	Mono.Macr	SOCS3
GDI2	1.04238e-09	0.337533	0.655	0.66	2.20421e-05	Mono.Macr	GDI2
RBPJ.1	1.31735e-09	0.365182	0.345	0.282	2.78567e-05	Mono.Macr	RBPJ
LGMN.1	1.68615e-09	0.686466	0.384	0.344	3.56553e-05	Mono.Macr	LGMN
ACTR3.1	1.88017e-09	0.401292	0.562	0.571	3.97582e-05	Mono.Macr	ACTR3
NAGK.1	3.8736e-09	0.377766	0.371	0.315	8.19112e-05	Mono.Macr	NAGK
KLF6.1	3.96141e-09	0.361167	0.878	0.875	8.37679e-05	Mono.Macr	KLF6
GNAQ.1	5.00931e-09	0.325327	0.273	0.207	0.000105927	Mono.Macr	GNAQ
PAK1	6.09461e-09	0.327868	0.254	0.185	0.000128877	Mono.Macr	PAK1
PLD3.1	6.48734e-09	0.593864	0.407	0.377	0.000137181	Mono.Macr	PLD3
MYL12A.1	1.05792e-08	0.268969	0.856	0.889	0.000223708	Mono.Macr	MYL12A
NR4A1	1.27626e-08	0.362816	0.617	0.57	0.000269878	Mono.Macr	NR4A1
LAMP2.1	1.37462e-08	0.394474	0.35	0.297	0.000290678	Mono.Macr	LAMP2
KDM6B	1.50172e-08	0.449607	0.359	0.307	0.000317555	Mono.Macr	KDM6B
ARL14.1	1.56482e-08	-0.437052	0.173	0.272	0.000330897	Mono.Macr	ARL14
ATP5B	1.62131e-08	-0.256153	0.715	0.823	0.000342842	Mono.Macr	ATP5B
CMTM6	1.74514e-08	0.345745	0.595	0.602	0.000369027	Mono.Macr	CMTM6
STK4.1	2.18402e-08	0.38789	0.303	0.243	0.000461832	Mono.Macr	STK4
MXD1	2.28136e-08	0.411807	0.335	0.271	0.000482417	Mono.Macr	MXD1
DDIT4.1	3.25022e-08	-0.436843	0.535	0.666	0.000687291	Mono.Macr	DDIT4
TWF2.1	4.16857e-08	0.348417	0.335	0.284	0.000881486	Mono.Macr	TWF2
RNF13	6.463e-08	0.368082	0.372	0.325	0.00136667	Mono.Macr	RNF13
HIF1A.1	7.54709e-08	0.384063	0.434	0.396	0.00159591	Mono.Macr	HIF1A
H2AFY	8.75019e-08	0.291	0.656	0.679	0.00185031	Mono.Macr	H2AFY
CD81.1	9.90641e-08	0.462148	0.422	0.387	0.00209481	Mono.Macr	CD81
ARL5A.1	1.3804e-07	0.366439	0.511	0.5	0.002919	Mono.Macr	ARL5A
M6PR	1.38815e-07	0.331456	0.408	0.373	0.00293539	Mono.Macr	M6PR
TXNIP.1	1.56144e-07	0.387469	0.488	0.446	0.00330183	Mono.Macr	TXNIP
RPL12	1.95431e-07	-0.344668	0.998	0.999	0.00413258	Mono.Macr	RPL12
CAPZA1	2.16815e-07	0.268624	0.553	0.534	0.00458477	Mono.Macr	CAPZA1
PPIF	2.18633e-07	0.385448	0.272	0.218	0.00462322	Mono.Macr	PPIF
GCA	2.2516e-07	0.315538	0.272	0.212	0.00476123	Mono.Macr	GCA
C8orf4	2.50997e-07	-0.294201	0.17	0.263	0.00530757	Mono.Macr	C8orf4
UPP1	2.99697e-07	0.296592	0.384	0.323	0.0063374	Mono.Macr	UPP1
IFI16.1	4.53973e-07	0.344917	0.449	0.413	0.0095997	Mono.Macr	IFI16
GRINA	4.91537e-07	0.3587	0.363	0.323	0.0103941	Mono.Macr	GRINA
AKR1A1	5.0366e-07	0.348088	0.533	0.543	0.0106504	Mono.Macr	AKR1A1
SEC61B.1	6.50084e-07	0.312859	0.7	0.74	0.0137467	Mono.Macr	SEC61B
DHRS7.1	7.85709e-07	0.348155	0.416	0.393	0.0166146	Mono.Macr	DHRS7
HMGN2	9.70392e-07	0.415791	0.761	0.802	0.0205199	Mono.Macr	HMGN2
NUDT3	1.03595e-06	0.311837	0.308	0.259	0.0219061	Mono.Macr	NUDT3
C4orf3	1.10612e-06	-0.289424	0.707	0.805	0.02339	Mono.Macr	C4orf3
PICALM.1	1.10835e-06	0.265948	0.26	0.208	0.0234372	Mono.Macr	PICALM
SSR1	1.29386e-06	0.278945	0.467	0.444	0.0273599	Mono.Macr	SSR1
RPS24	1.45226e-06	-0.250994	0.997	0.997	0.0307094	Mono.Macr	RPS24
H2AFV	1.49135e-06	0.355845	0.548	0.558	0.0315361	Mono.Macr	H2AFV
CLK1	1.53328e-06	0.332709	0.505	0.487	0.0324228	Mono.Macr	CLK1
RPL7A	1.7898e-06	-0.341213	0.982	0.983	0.0378471	Mono.Macr	RPL7A
LIPA.1	1.86878e-06	0.426161	0.293	0.25	0.0395173	Mono.Macr	LIPA
COPE.1	1.96597e-06	0.269647	0.688	0.718	0.0415723	Mono.Macr	COPE
IFI6	2.1041e-06	0.455223	0.655	0.631	0.0444934	Mono.Macr	IFI6
CSRNP1.1	2.34228e-06	0.378304	0.33	0.289	0.0495299	Mono.Macr	CSRNP1
CEBPB	2.68801e-06	0.254179	0.683	0.713	0.0568407	Mono.Macr	CEBPB
DBNL.1	3.76494e-06	0.330449	0.351	0.321	0.0796135	Mono.Macr	DBNL
NCOA4	4.42101e-06	0.301387	0.305	0.263	0.0934866	Mono.Macr	NCOA4
PPP1R15A	4.89544e-06	0.325502	0.793	0.759	0.103519	Mono.Macr	PPP1R15A
SUMO3	7.77489e-06	0.275181	0.518	0.516	0.164408	Mono.Macr	SUMO3
LGALS3	8.60746e-06	0.34534	0.67	0.673	0.182013	Mono.Macr	LGALS3
CKS2	1.9672e-05	0.509743	0.53	0.527	0.415984	Mono.Macr	CKS2
SPCS3	2.05506e-05	0.290203	0.399	0.386	0.434564	Mono.Macr	SPCS3
PDIA3.1	2.12652e-05	0.251423	0.637	0.689	0.449673	Mono.Macr	PDIA3
ALOX5	2.22948e-05	0.329898	0.306	0.272	0.471445	Mono.Macr	ALOX5
LDHA.1	2.51469e-05	0.27853	0.724	0.74	0.531757	Mono.Macr	LDHA
SSR3	3.01763e-05	0.269785	0.592	0.624	0.638107	Mono.Macr	SSR3
NANS	4.09967e-05	0.297001	0.324	0.295	0.866916	Mono.Macr	NANS
H2AFZ	4.26237e-05	0.297624	0.8	0.86	0.901321	Mono.Macr	H2AFZ
FLOT1.1	4.48987e-05	0.327609	0.423	0.416	0.949428	Mono.Macr	FLOT1
RNF149	5.34085e-05	0.255394	0.432	0.415	1	Mono.Macr	RNF149
TWISTNB.1	5.657e-05	0.535781	0.287	0.251	1	Mono.Macr	TWISTNB
LY6E.1	6.25317e-05	0.362802	0.713	0.759	1	Mono.Macr	LY6E
SDF2L1	7.88911e-05	0.288593	0.494	0.492	1	Mono.Macr	SDF2L1
ASAH1	8.72601e-05	0.317954	0.701	0.747	1	Mono.Macr	ASAH1
ATP6AP1	8.74684e-05	0.309411	0.431	0.436	1	Mono.Macr	ATP6AP1
SELK	0.000148706	0.362022	0.7	0.757	1	Mono.Macr	SELK
GNA15	0.000158617	0.333508	0.309	0.284	1	Mono.Macr	GNA15
OSTF1	0.000173601	0.277411	0.434	0.435	1	Mono.Macr	OSTF1
TACC1.1	0.000189766	0.268723	0.299	0.271	1	Mono.Macr	TACC1
RAB8A	0.000300755	0.286987	0.279	0.254	1	Mono.Macr	RAB8A
BLVRA	0.000437021	0.25201	0.267	0.237	1	Mono.Macr	BLVRA
CHMP1B	0.000526647	0.402729	0.529	0.562	1	Mono.Macr	CHMP1B
ATG3	0.00082491	0.29006	0.342	0.333	1	Mono.Macr	ATG3
CCDC85B.1	0.000836192	0.280578	0.405	0.393	1	Mono.Macr	CCDC85B
NDRG2	0.00106979	0.329526	0.314	0.297	1	Mono.Macr	NDRG2
DRAM2	0.00121246	0.292048	0.363	0.361	1	Mono.Macr	DRAM2
IQGAP1	0.00139508	0.253651	0.375	0.367	1	Mono.Macr	IQGAP1
HNRNPU	0.00149683	0.262118	0.553	0.593	1	Mono.Macr	HNRNPU
MAP3K8	0.0015034	0.257715	0.393	0.377	1	Mono.Macr	MAP3K8
UBE2L6.1	0.00152923	0.381494	0.399	0.404	1	Mono.Macr	UBE2L6
SNX6	0.00170956	0.276495	0.39	0.391	1	Mono.Macr	SNX6
IFI44L	0.00204107	0.260247	0.258	0.227	1	Mono.Macr	IFI44L
JMJD1C.1	0.00206951	0.294131	0.261	0.24	1	Mono.Macr	JMJD1C
LCN2.1	0.00252773	-0.57126	0.197	0.253	1	Mono.Macr	LCN2
MT1X	0.00292449	0.321499	0.446	0.431	1	Mono.Macr	MT1X
EIF4E	0.00324734	0.299946	0.483	0.51	1	Mono.Macr	EIF4E
GPNMB	0.00471829	0.341746	0.462	0.438	1	Mono.Macr	GPNMB
C20orf27	0.00613442	0.250107	0.317	0.307	1	Mono.Macr	C20orf27
MX1	0.0089256	0.40628	0.279	0.274	1	Mono.Macr	MX1
HSPA5.1	0.00903976	0.273027	0.512	0.551	1	Mono.Macr	HSPA5
CCL5	0	2.72326	0.6	0.029	0	T cells	CCL5
CD52.2	0	2.5131	0.785	0.052	0	T cells	CD52
KLRB1	0	2.29728	0.497	0.012	0	T cells	KLRB1
CD3D	0	2.00902	0.667	0.03	0	T cells	CD3D
TRAC	0	1.99937	0.631	0.012	0	T cells	TRAC
CORO1A.2	0	1.69933	0.708	0.044	0	T cells	CORO1A
NKG7	0	1.63058	0.446	0.01	0	T cells	NKG7
CD2	0	1.62812	0.621	0.007	0	T cells	CD2
GZMA	0	1.47847	0.492	0.007	0	T cells	GZMA
CD69	0	1.41812	0.39	0.016	0	T cells	CD69
TRBC1	0	1.28901	0.41	0.007	0	T cells	TRBC1
PTPRC.2	0	1.28736	0.538	0.015	0	T cells	PTPRC
CD7	0	1.20853	0.503	0.01	0	T cells	CD7
CD3E	0	1.1869	0.513	0.006	0	T cells	CD3E
CST7	0	0.977075	0.385	0.007	0	T cells	CST7
GZMB	0	0.958961	0.282	0.008	0	T cells	GZMB
CYTIP	0	0.896922	0.359	0.008	0	T cells	CYTIP
AC092580.4	0	0.8962	0.41	0.007	0	T cells	AC092580.4
CD48	0	0.815198	0.379	0.008	0	T cells	CD48
FYB.2	0	0.800965	0.4	0.015	0	T cells	FYB
ITM2A	0	0.761334	0.338	0.011	0	T cells	ITM2A
CD3G	0	0.758814	0.333	0.01	0	T cells	CD3G
GIMAP7	0	0.578076	0.287	0.007	0	T cells	GIMAP7
TBC1D10C	0	0.526527	0.277	0.004	0	T cells	TBC1D10C
GZMM	0	0.501402	0.262	0.003	0	T cells	GZMM
LCK	2.25437e-304	0.883061	0.39	0.018	4.76708e-300	T cells	LCK
HCST.2	4.218e-277	1.30221	0.564	0.042	8.91938e-273	T cells	HCST
CD53.2	6.0508e-251	0.710177	0.318	0.014	1.2795e-246	T cells	CD53
CD37.2	1.54844e-247	0.737012	0.379	0.021	3.27434e-243	T cells	CD37
LTB	2.1428e-238	1.53718	0.415	0.026	4.53116e-234	T cells	LTB
SAMSN1.2	4.50902e-235	0.664142	0.297	0.013	9.53477e-231	T cells	SAMSN1
CXCR4.2	1.46004e-234	1.49012	0.482	0.036	3.0874e-230	T cells	CXCR4
RGS1.2	2.52844e-234	1.93954	0.59	0.054	5.34664e-230	T cells	RGS1
ALOX5AP.2	2.65969e-207	0.85266	0.462	0.036	5.62418e-203	T cells	ALOX5AP
GYPC.2	2.59009e-180	0.525682	0.282	0.016	5.47701e-176	T cells	GYPC
LAT	3.61706e-173	0.605064	0.272	0.015	7.64864e-169	T cells	LAT
VIM.2	1.01962e-161	0.75545	0.497	0.052	2.15609e-157	T cells	VIM
TRBC2	1.95852e-157	1.43343	0.554	0.071	4.14148e-153	T cells	TRBC2
IL32.1	3.89238e-145	2.28093	0.81	0.174	8.23083e-141	T cells	IL32
IL2RG	3.08412e-142	0.757152	0.364	0.033	6.52168e-138	T cells	IL2RG
EVL.1	4.84632e-131	0.96703	0.477	0.061	1.0248e-126	T cells	EVL
LAPTM5.2	1.08151e-119	0.969771	0.533	0.079	2.28696e-115	T cells	LAPTM5
CCL4.2	1.16985e-114	1.98398	0.426	0.056	2.47376e-110	T cells	CCL4
SRGN.2	1.12503e-110	1.50359	0.764	0.189	2.37898e-106	T cells	SRGN
ACAP1	2.80995e-104	0.730354	0.354	0.042	5.94193e-100	T cells	ACAP1
RAC2.2	3.77916e-77	1.03316	0.492	0.105	7.99141e-73	T cells	RAC2
WIPF1	2.65792e-71	0.427329	0.267	0.033	5.62043e-67	T cells	WIPF1
EMP3.2	1.37077e-70	0.617049	0.328	0.049	2.89862e-66	T cells	EMP3
LSP1.2	4.40352e-49	0.74097	0.405	0.097	9.31168e-45	T cells	LSP1
CLEC2D	8.65437e-48	0.569767	0.318	0.065	1.83005e-43	T cells	CLEC2D
RORA	2.26196e-44	0.575524	0.272	0.052	4.78314e-40	T cells	RORA
IFITM2.2	8.18277e-44	1.05049	0.523	0.167	1.73033e-39	T cells	IFITM2
GMFG.2	4.28755e-43	0.865858	0.656	0.238	9.06645e-39	T cells	GMFG
CCL4L2.2	1.45328e-39	1.27288	0.272	0.057	3.07311e-35	T cells	CCL4L2
PPP1R18.2	2.54474e-39	0.469603	0.318	0.074	5.3811e-35	T cells	PPP1R18
LCP1.2	3.60229e-33	0.424007	0.308	0.078	7.6174e-29	T cells	LCP1
MSN.2	1.98602e-32	0.361918	0.256	0.057	4.19963e-28	T cells	MSN
FNBP1	3.43974e-29	0.455753	0.282	0.075	7.27367e-25	T cells	FNBP1
STK4.2	6.53099e-28	0.653843	0.549	0.243	1.38104e-23	T cells	STK4
RP11-347P5.1	1.2404e-25	0.426087	0.297	0.086	2.62294e-21	T cells	RP11-347P5.1
B2M.2	7.70944e-24	0.591774	1	1	1.63024e-19	T cells	B2M
ISG20	1.17976e-23	0.621374	0.421	0.169	2.49473e-19	T cells	ISG20
TSC22D3.2	1.4743e-23	0.942032	0.677	0.395	3.11756e-19	T cells	TSC22D3
PFN1.2	1.21076e-22	0.599768	1	0.98	2.56027e-18	T cells	PFN1
LIMD2	2.31026e-22	0.567722	0.41	0.163	4.88528e-18	T cells	LIMD2
S100A4.2	1.19849e-21	0.777912	0.882	0.566	2.53433e-17	T cells	S100A4
SKAP1	1.33197e-21	0.361807	0.251	0.074	2.81658e-17	T cells	SKAP1
2024-09-01	2.91006e-21	0.537022	0.277	0.09	6.15361e-17	T cells	2024-09-01
CD96	1.09715e-20	0.387927	0.256	0.08	2.32004e-16	T cells	CD96
RGS10.2	1.56184e-20	0.431994	0.359	0.138	3.30267e-16	T cells	RGS10
ARHGDIB.2	2.90419e-19	0.718069	0.877	0.717	6.14119e-15	T cells	ARHGDIB
HSPB1.2	2.49752e-18	-0.850289	0.99	0.998	5.28126e-14	T cells	HSPB1
RARRES3	3.16502e-18	0.478185	0.585	0.31	6.69274e-14	T cells	RARRES3
HLA-C.2	1.7936e-17	0.524546	0.99	0.89	3.79276e-13	T cells	HLA-C
NR3C1	2.79587e-17	0.411456	0.308	0.117	5.91214e-13	T cells	NR3C1
RGCC.2	3.41958e-17	0.603087	0.308	0.115	7.23105e-13	T cells	RGCC
SOCS1	5.07201e-16	0.43974	0.262	0.096	1.07253e-11	T cells	SOCS1
KIAA1551	7.10933e-16	0.330127	0.251	0.089	1.50334e-11	T cells	KIAA1551
FTL.2	2.93341e-15	-0.771714	1	1	6.20299e-11	T cells	FTL
TXNIP.2	7.91062e-15	0.567774	0.687	0.446	1.67278e-10	T cells	TXNIP
CRABP2.2	2.03671e-14	-0.985212	0.318	0.57	4.30682e-10	T cells	CRABP2
ANKRD28	2.11373e-14	0.355753	0.256	0.099	4.46969e-10	T cells	ANKRD28
CREM.2	2.91943e-14	0.564091	0.405	0.213	6.17344e-10	T cells	CREM
S100P.2	6.44151e-14	-0.482078	0.964	0.997	1.36212e-09	T cells	S100P
RPS29	9.68935e-14	0.35471	1	0.999	2.04891e-09	T cells	RPS29
S100A9	1.91268e-13	-1.313	0.195	0.471	4.04455e-09	T cells	S100A9
CARD16.2	2.03196e-13	0.442183	0.369	0.183	4.29679e-09	T cells	CARD16
CMTM3.1	2.63407e-13	0.318298	0.267	0.105	5.57e-09	T cells	CMTM3
IFI27.2	6.12237e-13	-1.05787	0.728	0.847	1.29464e-08	T cells	IFI27
PSMB9.2	9.66824e-13	0.529411	0.544	0.327	2.04445e-08	T cells	PSMB9
C9orf142	1.15616e-12	0.461498	0.559	0.353	2.44481e-08	T cells	C9orf142
HLA-A.2	1.34147e-12	0.509486	0.964	0.874	2.83668e-08	T cells	HLA-A
S100A6.2	1.35383e-12	-0.638129	1	0.998	2.8628e-08	T cells	S100A6
CST3.2	1.36812e-12	-0.570251	0.933	0.986	2.89304e-08	T cells	CST3
LINC00152.1	1.97385e-12	0.35501	0.328	0.146	4.1739e-08	T cells	LINC00152
S100A16.2	2.41041e-12	-0.627786	0.441	0.669	5.09705e-08	T cells	S100A16
PSIP1	4.51069e-12	0.327257	0.303	0.135	9.53831e-08	T cells	PSIP1
GPSM3.2	8.53644e-12	0.452407	0.374	0.194	1.80511e-07	T cells	GPSM3
MYL12A.2	1.46916e-11	0.420943	0.974	0.887	3.10668e-07	T cells	MYL12A
S100A11.1	1.53036e-11	-0.336402	1	1	3.2361e-07	T cells	S100A11
PPDPF.2	1.53126e-11	-0.441038	0.969	0.99	3.23799e-07	T cells	PPDPF
FXYD3.2	3.89931e-11	-0.491389	0.949	0.994	8.24549e-07	T cells	FXYD3
PHLDA2.2	4.52846e-11	-0.880481	0.733	0.847	9.57587e-07	T cells	PHLDA2
CSTB.2	4.80203e-11	-0.866995	0.974	0.973	1.01544e-06	T cells	CSTB
CKLF.2	4.92113e-11	0.519831	0.723	0.543	1.04062e-06	T cells	CKLF
STK17A	4.98518e-11	0.386986	0.39	0.213	1.05417e-06	T cells	STK17A
ICAM3	6.12057e-11	0.405844	0.338	0.177	1.29426e-06	T cells	ICAM3
RPS27A.2	6.45856e-11	0.250216	1	0.999	1.36573e-06	T cells	RPS27A
RPS15A.2	9.11274e-11	0.27103	1	1	1.92698e-06	T cells	RPS15A
PFDN5	1.35782e-10	0.27573	0.99	0.982	2.87125e-06	T cells	PFDN5
MT2A.2	2.8919e-10	0.299642	0.605	0.394	6.1152e-06	T cells	MT2A
RPS25	2.94653e-10	0.273906	1	0.999	6.23074e-06	T cells	RPS25
RHOV.2	4.09355e-10	-0.677498	0.262	0.467	8.65623e-06	T cells	RHOV
STK17B.1	4.26029e-10	0.412503	0.344	0.18	9.00882e-06	T cells	STK17B
RPL26	7.89327e-10	0.253841	1	0.997	1.66911e-05	T cells	RPL26
SDC4.1	8.51982e-10	-0.669598	0.395	0.578	1.8016e-05	T cells	SDC4
BTG1.2	8.74047e-10	0.44168	0.938	0.831	1.84826e-05	T cells	BTG1
CCND1.2	8.74063e-10	-0.739151	0.579	0.717	1.84829e-05	T cells	CCND1
ID2.2	8.74363e-10	0.366459	0.79	0.634	1.84893e-05	T cells	ID2
HLA-B.2	9.98784e-10	0.389055	1	0.928	2.11203e-05	T cells	HLA-B
HOPX	1.24243e-09	0.419769	0.328	0.177	2.62725e-05	T cells	HOPX
WBP5.1	1.25411e-09	-0.507796	0.59	0.733	2.65195e-05	T cells	WBP5
RPL12.1	1.35916e-09	0.253199	1	0.999	2.87408e-05	T cells	RPL12
TNFAIP3.2	1.4899e-09	0.469111	0.4	0.233	3.15054e-05	T cells	TNFAIP3
CD24.2	1.64146e-09	-0.877499	0.626	0.747	3.47103e-05	T cells	CD24
MBNL1.2	1.66113e-09	0.349217	0.379	0.216	3.51262e-05	T cells	MBNL1
RPL7A.1	1.87912e-09	0.262755	0.995	0.983	3.97358e-05	T cells	RPL7A
PPHLN1	2.46004e-09	0.326531	0.569	0.376	5.202e-05	T cells	PPHLN1
SH3BGRL3.2	2.56551e-09	0.405129	0.974	0.943	5.42502e-05	T cells	SH3BGRL3
GPNMB.1	2.58556e-09	-0.555483	0.215	0.44	5.46742e-05	T cells	GPNMB
HNRNPA1	2.87781e-09	0.299142	0.985	0.954	6.08543e-05	T cells	HNRNPA1
CAPS.2	4.6924e-09	-0.545517	0.41	0.587	9.92255e-05	T cells	CAPS
RPL35	4.75599e-09	0.283705	0.99	0.998	0.00010057	T cells	RPL35
COTL1.2	5.40725e-09	0.427836	0.487	0.314	0.000114342	T cells	COTL1
DSTN.1	6.77058e-09	-0.401912	0.913	0.959	0.000143171	T cells	DSTN
C9orf16.1	7.33188e-09	0.331841	0.913	0.803	0.00015504	T cells	C9orf16
NPC2.2	1.14858e-08	-0.457315	0.821	0.892	0.000242879	T cells	NPC2
C9orf78	1.67664e-08	0.351687	0.472	0.306	0.000354542	T cells	C9orf78
FABP4.2	1.72574e-08	0.605993	0.518	0.338	0.000364925	T cells	FABP4
BRI3	2.23533e-08	-0.582805	0.503	0.637	0.000472682	T cells	BRI3
SCCPDH.2	2.42074e-08	-0.475802	0.641	0.759	0.00051189	T cells	SCCPDH
SFN.2	2.53874e-08	-0.576395	0.631	0.773	0.000536843	T cells	SFN
TM4SF1.1	2.90684e-08	-0.590229	0.149	0.336	0.000614681	T cells	TM4SF1
ACTB.2	3.07241e-08	0.299631	1	0.999	0.000649692	T cells	ACTB
FTH1	3.51663e-08	-0.629132	1	1	0.000743627	T cells	FTH1
KRT7.2	3.96961e-08	-0.499914	0.923	0.962	0.000839413	T cells	KRT7
NUPR1	4.03304e-08	-0.414633	0.21	0.407	0.000852826	T cells	NUPR1
PPP2R5C	4.44499e-08	0.302679	0.436	0.276	0.000939937	T cells	PPP2R5C
S100A2.2	4.88674e-08	-0.929614	0.769	0.861	0.00103335	T cells	S100A2
APOBEC3G	5.42166e-08	0.367016	0.328	0.192	0.00114646	T cells	APOBEC3G
PHLDA3.2	5.86475e-08	-0.491031	0.338	0.509	0.00124016	T cells	PHLDA3
SLPI.2	6.2062e-08	-0.811566	0.549	0.684	0.00131236	T cells	SLPI
CXCL8.2	7.122e-08	-1.27847	0.221	0.399	0.00150602	T cells	CXCL8
RAC1	7.34236e-08	-0.290753	0.995	0.985	0.00155261	T cells	RAC1
DDX24.1	7.80587e-08	0.346554	0.564	0.411	0.00165063	T cells	DDX24
TRAF4.2	7.89194e-08	-0.508469	0.446	0.6	0.00166883	T cells	TRAF4
MAT2B	8.24203e-08	0.303635	0.492	0.326	0.00174286	T cells	MAT2B
PRPF38B	8.90012e-08	0.319788	0.621	0.45	0.00188202	T cells	PRPF38B
KRT19.2	1.00601e-07	-0.427727	0.979	0.998	0.0021273	T cells	KRT19
SAT1.2	1.17975e-07	-0.561356	0.908	0.905	0.00249471	T cells	SAT1
ZFAND2A	1.18885e-07	-0.719881	0.226	0.406	0.00251393	T cells	ZFAND2A
ANXA2	1.29086e-07	-0.418761	0.836	0.912	0.00272965	T cells	ANXA2
CXCL17.1	1.34242e-07	-0.65166	0.144	0.312	0.00283869	T cells	CXCL17
HSBP1.2	1.45524e-07	-0.342553	0.779	0.886	0.00307726	T cells	HSBP1
HLA-F	1.46858e-07	0.366359	0.415	0.268	0.00310545	T cells	HLA-F
HLA-E.2	2.36394e-07	0.359989	0.897	0.784	0.00499879	T cells	HLA-E
MARCKS	2.38859e-07	-0.376968	0.774	0.851	0.00505092	T cells	MARCKS
LEPROTL1	2.38979e-07	0.491589	0.482	0.33	0.00505344	T cells	LEPROTL1
TNFAIP8.1	2.48163e-07	0.256041	0.308	0.169	0.00524766	T cells	TNFAIP8
RAB25.2	2.57008e-07	-0.385114	0.605	0.721	0.00543469	T cells	RAB25
S100A14.2	2.64323e-07	-0.826553	0.333	0.5	0.00558938	T cells	S100A14
RPL21	2.92774e-07	0.27816	1	0.999	0.00619099	T cells	RPL21
ARL6IP5.2	3.04718e-07	0.358386	0.651	0.486	0.00644357	T cells	ARL6IP5
JAK1.1	3.11448e-07	0.302445	0.503	0.36	0.00658588	T cells	JAK1
GPX1.2	3.46083e-07	-0.410512	0.877	0.923	0.00731827	T cells	GPX1
[truncated: 3,294 more rows]
